# Supplementary material for: Silver-mediated direct trifluoromethoxylation of α-diazo esters via the −OCF3 anion
Source: Royal Society of Chemistry journal article supplement (doi:10.1039/c6cc03040h), 2016-01-01

## Supporting Information

### Silver-Mediated Direct Trifluoromethoxylation of $\alpha$ -Diazo Esters by $^-OCF_3$ Anion

Gao-Feng Zha, Jia-Bin Han, Xiao-Qian Hu, Hua-Li Qin\*, Wan-Yin Fang, Cheng-Pan Zhang\*

School of Chemistry, Chemical Engineering and Life Science, Wuhan University of Technology, 205 Luoshi Road, Wuhan, China, 400032  
Email: [qinhuali@whut.edu.cn](mailto:qinhuali@whut.edu.cn), [cpzhang@whut.edu.cn](mailto:cpzhang@whut.edu.cn)

## Table of content

|                                                                                                              |     |
|--------------------------------------------------------------------------------------------------------------|-----|
| 1. General considerations.....                                                                               | S2  |
| 2. Screening the optimized reaction conditions for silver-mediated trifluoromethoxylation of <b>1a</b> ..... | S2  |
| 3. Synthesis of $CF_3SO_2OCF_3$ .....                                                                        | S5  |
| 4. General procedures for the synthesis of $\alpha$ -diazo esters.....                                       | S6  |
| 5. Typical procedures for silver-mediated trifluoromethoxylation of $\alpha$ -diazo esters.....              | S8  |
| 6. Control experiments.....                                                                                  | S24 |
| 7. NMR spectra of <b>1o</b> , <b>1p</b> , <b>1r</b> , <b>3b</b> , and <b>3c</b> .....                        | S31 |
| 8. NMR spectra of <b>2</b> and <b>4</b> .....                                                                | S36 |

## 1. General Considerations

All reactions were carried out under a nitrogen atmosphere. Unless otherwise specified, NMR spectra were recorded in CDCl<sub>3</sub> on a 500 or 400 MHz (for <sup>1</sup>H), 471 or 376 MHz (for <sup>19</sup>F), or 126 or 100 MHz (for <sup>13</sup>C) spectrometer. All chemical shifts were reported in ppm relative to TMS (<sup>1</sup>H NMR, 0 ppm) and PhCF<sub>3</sub> (<sup>19</sup>F NMR, -63.0 ppm) as internal or external standards. The HPLC experiments were carried out on a Waters e2695 instrument (column: J&K, RP-C18, 5 μm, 4.6 × 150 mm), and the yields of the products were determined by using the corresponding pure compounds as the external standards. The coupling constants were reported in Hertz (Hz). The following abbreviations were used to explain the multiplicities: s = singlet, d = doublet, t = triplet, q = quartet, m = multiplet, br = broad. Melting points were measured and uncorrected. MS experiments were performed on a TOF-Q ESI or CI/EI instrument. AgOCF<sub>3</sub> was synthesized and used in CH<sub>3</sub>CN solutions (0.5 M or 1.0 M) according to the literature.<sup>[1]</sup> Other Q<sup>+</sup>[OCF<sub>3</sub>]<sup>-</sup> salts were prepared *in situ* from the corresponding anhydrous fluorides according to the literature.<sup>[2]</sup> Solvents were dried before use according to the literature.<sup>[3]</sup> 2,2,6,6-tetramethylpiperidiny-1-oxy (TEMPO) was sublimated before use according to the literature.<sup>[4]</sup> Other reagents used in the reactions were all purchased from commercial sources and used without further purification.

## 2. Screening the optimized reaction conditions for silver-mediated trifluoromethoxylation of **1a**

**Table 1** Trifluoromethoxylation of **1a** by AgOCF<sub>3</sub>

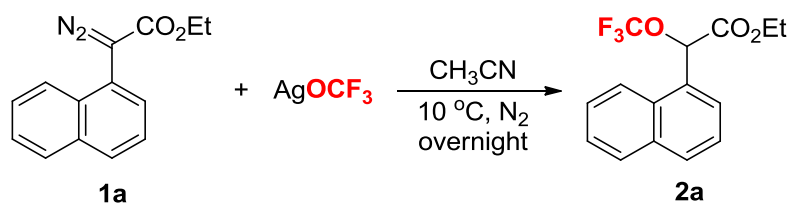

| Entry | <b>1a</b> : AgOCF <sub>3</sub> <sup>a</sup> | Conditions <sup>b</sup> | Yield<br>( <b>2a</b> , %) <sup>c</sup> |
|-------|---------------------------------------------|-------------------------|----------------------------------------|
| 1     | 1 : 2                                       | Method A                | 43                                     |
| 2     | 2 : 1                                       | Method A                | 36                                     |

|                       |              |                                          |                |
|-----------------------|--------------|------------------------------------------|----------------|
| 3                     | 1 : 4        | Method A                                 | 53             |
| 4                     | 1 : 4        | Method A at -30 °C, then warmed to 10 °C | 53             |
| 5                     | 1 : 4        | Method A at 25 °C                        | 58             |
| 6                     | 1 : 2        | Method B                                 | 20             |
| 7                     | 1 : 2        | Method C                                 | 38             |
| 8 <sup>d</sup>        | 1 : 2        | Method C                                 | 36             |
| 9 <sup>d</sup>        | 1 : 3        | Method C                                 | 45             |
| <b>10<sup>d</sup></b> | <b>1 : 4</b> | <b>Method C</b>                          | <b>60 (56)</b> |
| 11                    | 1 : 2        | Method D                                 | 37             |
| 12                    | 1 : 2        | Method E                                 | 41             |

<sup>a</sup> The molar ratio of **1a** and AgOCF<sub>3</sub>. The reactions were run on a 0.1 or 0.5 mmol scale of **1a** and the solutions of AgOCF<sub>3</sub> (0.5 or 1.0 M) in CH<sub>3</sub>CN were used. <sup>b</sup> Reaction conditions: *Method A*: the AgOCF<sub>3</sub> solution was added into a mixture of **1a** and CH<sub>3</sub>CN in one portion via syringe. *Method B*: the AgOCF<sub>3</sub> solution was added dropwise into a mixture of **1a** and CH<sub>3</sub>CN. *Method C*: a solution of **1a** in CH<sub>3</sub>CN was added into AgOCF<sub>3</sub> in one portion via syringe. *Method D*: a solution of **1a** in CH<sub>3</sub>CN was added dropwise into AgOCF<sub>3</sub>. *Method E*: The solutions of **1a** and AgOCF<sub>3</sub> in CH<sub>3</sub>CN were simultaneously added dropwise into a flask. All reactions (for Methods A, B, C, D, and E) were conducted at 10 °C under a N<sub>2</sub> atmosphere overnight. <sup>c</sup> The yield was determined by HPLC using **2a** as the external standard (*t<sub>R</sub>* = 7.71 min, λ<sub>max</sub> = 221.6 nm, methanol/water = 75 : 25 (v / v)). Isolated yield is reported in parenthesis. <sup>d</sup> The neat **1a** was used instead of its solution.

**Table 2** Trifluoromethoxylation of **1a** by CF<sub>3</sub>SO<sub>2</sub>OCF<sub>3</sub> in the presence of AgF

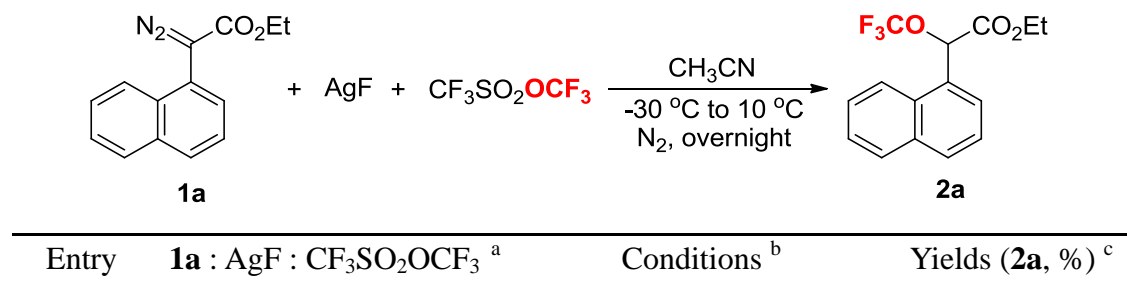

|                 |             |                   |         |
|-----------------|-------------|-------------------|---------|
| 1               | 1 : 2 : 8   | Method A          | 58      |
| 2               | 1 : 2 : 8   | Method B          | 77      |
| 3               | 1 : 1 : 8   | Method B          | 36      |
| 4               | 1 : 3 : 8   | Method B          | 84      |
| 5               | 1 : 4 : 8   | Method B          | 80      |
| 6               | 1 : 5 : 8   | Method B          | 92 (90) |
| 7               | 1 : 6 : 8   | Method B          | 93      |
| 8               | 1 : 3 : 3   | Method B          | 49      |
| 9               | 1 : 3 : 4.5 | Method B          | 69      |
| 10              | 1 : 3 : 6   | Method B          | 77 (74) |
| 11              | 1 : 2 : 5   | Method B          | 76 (75) |
| 12              | 1 : 0 : 5   | Method B          | 0       |
| 13 <sup>d</sup> | 1 : 2 : 8   | Method B at 10 °C | 89      |
| 14 <sup>d</sup> | 1 : 2 : 8   | Method C          | 76      |
| 15 <sup>d</sup> | 1 : 2 : 8   | Method C at 10 °C | 83      |
| 16 <sup>d</sup> | 1 : 5 : 8   | Method C at 10 °C | 92      |

<sup>a</sup> The molar ratio of **1a**, AgF, and CF<sub>3</sub>SO<sub>2</sub>OCF<sub>3</sub>. The reactions were run on a 0.1 or 0.5 mmol scale of **1a**. <sup>b</sup> Reaction conditions: *Method A*: A solution of **1a** in CH<sub>3</sub>CN was added into a mixture of AgF, CF<sub>3</sub>SO<sub>2</sub>OCF<sub>3</sub>, and CH<sub>3</sub>CN at -30 °C in one portion via syringe under a N<sub>2</sub> atmosphere. *Method B*: CF<sub>3</sub>SO<sub>2</sub>OCF<sub>3</sub> was added into a mixture of **1a**, AgF, and CH<sub>3</sub>CN at -30 °C in one portion via syringe under a N<sub>2</sub> atmosphere. *Method C*: AgF was added into a mixture of **1a**, CF<sub>3</sub>SO<sub>2</sub>OCF<sub>3</sub>, and CH<sub>3</sub>CN at -30 °C in one portion. After 5 mins, the reaction mixtures (for *Methods A, B, and C*) were gradually warmed to 10 °C overnight. <sup>c</sup> The yield was determined by HPLC using **2a** as the external standard (*t<sub>R</sub>* = 7.71 min, λ<sub>max</sub> = 221.6 nm, methanol/water = 75 : 25 (v / v)). Isolated yield is reported in parenthesis. <sup>d</sup> The reaction is severe, which releases a great quantity of gases.

**Table 3** Trifluoromethoxylation of **1a** by other *in situ* generated Q<sup>+</sup>[OCF<sub>3</sub>]<sup>-</sup> salts in the presence or absence of silver additives <sup>a</sup>

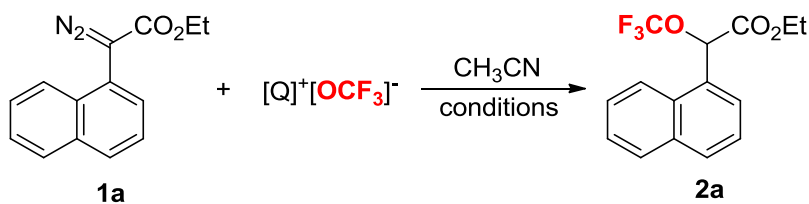

| Entry | $\text{Q}^+[\text{OCF}_3]^-$           | Silver additives                      | Yield ( <b>2a</b> , %) <sup>b</sup> |
|-------|----------------------------------------|---------------------------------------|-------------------------------------|
| 1     | [TAS][OCF <sub>3</sub> ]               | -                                     | 0                                   |
| 2     | Cs[OCF <sub>3</sub> ]                  | -                                     | 0                                   |
| 3     | K[OCF <sub>3</sub> ]                   | -                                     | 0                                   |
| 4     | [Me <sub>4</sub> N][OCF <sub>3</sub> ] | -                                     | 1                                   |
| 5     | [Me <sub>4</sub> N][OCF <sub>3</sub> ] | AgOTf ( 2.0)                          | 1                                   |
| 6     | [Me <sub>4</sub> N][OCF <sub>3</sub> ] | AgSbF <sub>6</sub> (2.0)              | 0                                   |
| 7     | [Me <sub>4</sub> N][OCF <sub>3</sub> ] | AgNO <sub>3</sub> (2.0)               | 0                                   |
| 8     | [Me <sub>4</sub> N][OCF <sub>3</sub> ] | Ag <sub>2</sub> CO <sub>3</sub> (2.0) | 32                                  |
| 9     | [Me <sub>4</sub> N][OCF <sub>3</sub> ] | Ag <sub>2</sub> O (2.0)               | 23                                  |

<sup>a</sup> Reaction conditions:  $\text{Q}^+[\text{OCF}_3]^-$  was prepared *in situ* by addition of  $\text{CF}_3\text{SO}_2\text{OCF}_3$  (0.8 mmol) into a mixture of  $\text{Q}^+\text{F}^-$  (0.2 mmol) and  $\text{CH}_3\text{CN}$  (1.0 mL) at  $-30\text{ }^\circ\text{C}$  in one portion via syringe under a  $\text{N}_2$  atmosphere. After 2 h, the reaction mixture was warmed to  $0\text{ }^\circ\text{C}$  followed by addition of a solution of **1a** (0.1 mmol) in  $\text{CH}_3\text{CN}$  (0.5 mL) or a solution of **1a** (0.1 mmol) in  $\text{CH}_3\text{CN}$  (0.5 mL) and the silver additive (0.2 mmol). The mixture was then warmed to  $10\text{ }^\circ\text{C}$  overnight. <sup>b</sup> The yield was determined by  $^{19}\text{F}$  NMR using  $\text{PhCF}_3$  as an internal standard.

### 3. Synthesis of $\text{CF}_3\text{SO}_2\text{OCF}_3$ <sup>5</sup>

A three-necked flask was charged with  $\text{CF}_3\text{SO}_3\text{H}$  (205.0 g, 120 mL, 1.37 mol) and a condenser with vigorous stirring. Anhydrous  $\text{P}_2\text{O}_5$  (32.0 g, 0.23 mol) was added slowly and the mixture was heated at  $120\text{ }^\circ\text{C}$  for about 3 h, then at  $130\text{ }^\circ\text{C}$  for 1 h and at  $150\text{ }^\circ\text{C}$  for another 2 h. The product ( $\text{CF}_3\text{SO}_2\text{OCF}_3$ , TFMT) was collected by bubbling into an aqueous NaOH solution (50.0 g NaOH in 800 mL water) at  $-10\text{ }^\circ\text{C}$ . The bottom layer was separated from the NaOH solution and distilled with anhydrous  $\text{P}_2\text{O}_5$  to give 45 mL of  $\text{CF}_3\text{SO}_2\text{OCF}_3$  as a colorless liquid (b.p.  $21\text{ }^\circ\text{C}$ , 1.79 g/mL ( $20\text{ }^\circ\text{C}$ , 760 Torr), 80.6 g,

54%), which was stored over anhydrous P<sub>2</sub>O<sub>5</sub> for further use in a freezer (-30 °C). <sup>19</sup>F NMR (471 MHz, CDCl<sub>3</sub>) δ -53.0 (s, 3F), -73.6 (s, 3F).

#### 4. General procedures for the synthesis of α-diazo esters

##### 4.1. General procedure for the preparation of alkyl α-diazo arylacetates (1a-cc) <sup>6</sup>

1,8-Diazabicyclo[5.4.0]undec-7-ene (DBU, 2.28 g, 15.0 mmol) was added slowly into a solution of benzoylated ester (10.0 mmol) and *p*-toluenesulfonyl azide (TsN<sub>3</sub>, 2.37 g, 12.0 mmol) in CH<sub>3</sub>CN (20 mL) at 0 °C with stirring. The mixture was reacted at room temperature overnight, quenched by water (100 mL), and extracted with DCM (3 × 30 mL). The combined organic layers were washed with water (50 mL), dried over anhydrous Na<sub>2</sub>SO<sub>4</sub>, and concentrated to dryness under the reduced pressure. The residual was purified by column chromatography on silica gel using petroleum ether / ethyl acetate = 20 : 1 (v / v) as eluent to give the title compounds.

The unknown α-diazo esters were fully characterized below.

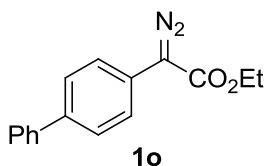

Ethyl 2-([1,1'-biphenyl]-4-yl)-2-diazoacetate (**1o**), red solid, 76% yield. M.p.: 90-91 °C. <sup>1</sup>H NMR (500 MHz, CDCl<sub>3</sub>) δ 7.65-7.56 (m, 6H), 7.45 (t, *J* = 7.5 Hz, 2H), 7.35 (t, *J* = 7.5 Hz, 1H), 4.37 (q, *J* = 7.0 Hz, 2H), 1.37 (t, *J* = 7.0 Hz, 3H). <sup>13</sup>C NMR (126 MHz, CDCl<sub>3</sub>) δ 165.2, 140.4, 138.6, 128.9, 127.6, 127.4, 126.9, 124.6, 124.3, 61.1, 14.5. IR (KBr): 3425, 3362, 3250, 3057, 3029, 3005, 2981, 2938, 2908, 2088, 1699, 1608, 1520, 1488, 1371, 1341, 1242, 1166, 1050, 1036, 849, 821, 761, 697 cm<sup>-1</sup>. HRMS-ESI (*m/z*) calcd. for [C<sub>16</sub>H<sub>15</sub>N<sub>2</sub>O<sub>2</sub>]<sup>+</sup> ([*M* + *H*]<sup>+</sup>): 267.1128, found: 267.1114.

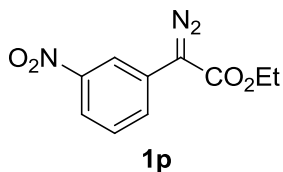

Ethyl 2-diazo-2-(3-nitrophenyl)acetate (**1p**), yellow solid, 77% yield. M.p.: 57-58 °C. <sup>1</sup>H NMR (500 MHz, CDCl<sub>3</sub>) δ 8.38 (s, 1H), 8.01 (d, *J* = 8.0 Hz, 1H), 7.84 (d, *J* = 8.0 Hz,

1H), 7.55 (t,  $J = 8.0$  Hz, 1H), 4.37 (q,  $J = 7.5$  Hz, 2H), 1.37 (t,  $J = 7.5$  Hz, 3H).  $^{13}\text{C}$  NMR (126 MHz,  $\text{CDCl}_3$ )  $\delta$  164.2, 148.8, 129.8, 129.0, 128.6, 120.3, 118.2, 61.5, 14.4. IR (KBr): 3438, 3122, 3095, 2993, 2912, 2098, 1696, 1688, 1571, 1522, 1457, 1377, 1346, 1238, 1176, 1164, 1094, 1049, 917, 897, 881, 805, 742, 718, 671  $\text{cm}^{-1}$ . HRMS-ESI ( $m/z$ ) calcd. for  $[\text{C}_{10}\text{H}_{10}\text{N}_3\text{O}_4]^+$  ( $[\text{M} + \text{H}]^+$ ): 236.0666, found: 236.0695.

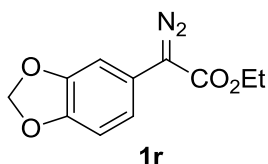

Ethyl 2-(benzodioxol-5-yl)-2-diazoacetate (**1r**), red solid, 85% yield. M.p.: 49-51  $^{\circ}\text{C}$ .  $^1\text{H}$  NMR (500 MHz,  $\text{CDCl}_3$ )  $\delta$  7.06 (s, 1H), 6.87-6.82 (m, 2H), 5.96 (s, 2H), 4.32 (q,  $J = 7.0$  Hz, 2H), 1.33 (t,  $J = 7.0$  Hz, 3H).  $^{13}\text{C}$  NMR (126 MHz,  $\text{CDCl}_3$ )  $\delta$  165.5, 148.4, 146.0, 118.8, 117.8, 108.8, 105.8, 101.3, 61.0, 14.5. IR (KBr): 3418, 3346, 3127, 2994, 2977, 2929, 2910, 2127, 2086, 1693, 1509, 1495, 1478, 1450, 1375, 1336, 1276, 1236, 1157, 1105, 1038, 936, 896, 875, 814, 792, 736, 679  $\text{cm}^{-1}$ . HRMS-ESI ( $m/z$ ) calcd. for  $[\text{C}_{11}\text{H}_{10}\text{N}_2\text{O}_4\text{Na}]^+$  ( $[\text{M} + \text{Na}]^+$ ): 257.0533, found: 257.0519.

#### 4.2. General procedure for the preparation of $\alpha$ -diazo vinylacetates (**3a-e**) <sup>7,8</sup>

1,8-Diazabicyclo[5.4.0]undec-7-ene (DBU, 1.83 g, 12.0 mmol) was added slowly into a solution of (*E*)-alk-3-enoate (10.0 mmol) and *p*-toluenesulfonyl azide ( $\text{TsN}_3$ , 2.37 g, 12.0 mmol) in  $\text{CH}_3\text{CN}$  (20 mL) at 0  $^{\circ}\text{C}$  with stirring. The mixture was reacted at room temperature overnight, quenched by water (100 mL), and extracted with DCM ( $3 \times 30$  mL). The combined organic layers were washed with water (50 mL), dried over anhydrous  $\text{Na}_2\text{SO}_4$ , and concentrated to dryness under the reduced pressure. The residual was purified by column chromatography on silica gel using petroleum ether / ethyl acetate = 20 : 1 (v / v) as eluent to give the title compounds.

The new products were fully characterized below.

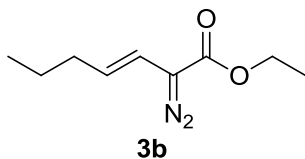

Ethyl (*E*)-2-diazohept-3-enoate (**3b**), red oil, 76 % yield.  $^1\text{H}$  NMR (500 MHz,  $\text{CDCl}_3$ )  $\delta$  5.73 (d,  $J = 15.7$  Hz, 1H), 5.30 (dt,  $J = 15.7$  Hz,  $J = 7.1$  Hz, 1H), 4.26 (q,  $J = 7.0$  Hz, 2H), 2.14 (q,  $J = 7.0$  Hz, 2H), 1.41 (m, 2H), 1.29 (t,  $J = 7.0$  Hz, 3H), 0.91 (t,  $J = 7.3$  Hz, 3H).  $^{13}\text{C}$  NMR (126 MHz,  $\text{CDCl}_3$ ):  $\delta$  165.7, 125.5, 111.9, 61.0, 34.9, 22.7, 14.5, 13.6. IR (KBr): 3287, 3188, 3143, 3103, 2961, 2933, 2873, 2097, 1705, 1465, 1393, 1372, 1335, 1314, 1267, 1213, 1173, 1136, 1099, 1044, 1024, 985, 952, 780, 739  $\text{cm}^{-1}$ . HRMS-ESI ( $m/z$ ) calcd. for  $[\text{C}_9\text{H}_{15}\text{N}_2\text{O}_2]^+$  ( $[\text{M} + \text{H}]^+$ ): 183.1128, found: 183.1148.

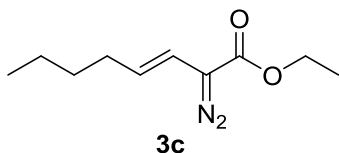

Ethyl (*E*)-2-diazo-oct-3-enoate (**3c**), red oil, 62 % yield.  $^1\text{H}$  NMR (500 MHz,  $\text{CDCl}_3$ )  $\delta$  5.73 (d,  $J = 15.7$  Hz, 1H), 5.31 (dt,  $J = 15.7$  Hz,  $J = 7.0$  Hz, 1H), 4.26 (q,  $J = 7.0$  Hz, 2H), 2.17 (q,  $J = 6.8$  Hz, 2H), 1.40-1.26 (m, 7H), 0.90 (t,  $J = 6.9$  Hz, 3H).  $^{13}\text{C}$  NMR (126 MHz,  $\text{CDCl}_3$ ):  $\delta$  165.7, 125.7, 111.7, 61.0, 32.5, 31.7, 22.1, 14.4, 13.8. IR (KBr): 2959, 2930, 2873, 2859, 2079, 1738, 1705, 1646, 1466, 1394, 1372, 1314, 1259, 1200, 1172, 1136, 1101, 1032, 952, 738  $\text{cm}^{-1}$ . HRMS-ESI ( $m/z$ ) calcd. for  $[\text{C}_{10}\text{H}_{16}\text{N}_2\text{O}_2\text{Na}]^+$  ( $[\text{M} + \text{Na}]^+$ ): 219.1104, found: 219.1117.

## 5. Typical procedures for silver-mediated trifluoromethoxylation of $\alpha$ -diazo esters

### 5.1. Trifluoromethoxylation of **1a** by $\text{AgOCF}_3$

In a nitrogen-filled glovebox, an oven-dried tube (20 mL) was charged with  $\text{AgOCF}_3$  (0.5 mol/L in  $\text{CH}_3\text{CN}$ , 4.0 mL, 2.0 mmol) with vigorous stirring. Then **1a** (0.12 g, 0.5 mmol) was added in one portion. The mixture was reacted at 10  $^\circ\text{C}$  overnight and quenched by water (30 mL) outside of glovebox (*Caution! This should be carried out in a fume hood because of the rapid release of gasses*). The resulting mixture was extracted with DCM (2  $\times$  30 mL). The organic layers were washed with water (50 mL), dried over anhydrous  $\text{Na}_2\text{SO}_4$ , and concentrated under the reduced pressure. The residual was purified by column chromatography on silica gel using petroleum ether / ethyl acetate = 20 : 1 (v / v) as eluent to give 84 mg of **2a** (56% yield).



## 5.2 Trifluoromethoxylation of 1a-cc and 3a-f by CF<sub>3</sub>SO<sub>2</sub>OCF<sub>3</sub> in the presence of AgF

Under a N<sub>2</sub> atmosphere, an oven-dried tube (20 mL) was charged with AgF (0.127 g, 1.0 mmol) and cooled to -30 °C with stirring. A solution of  $\alpha$ -diazo ester (0.5 mmol) in CH<sub>3</sub>CN (2.5 mL) was introduced via syringe. Then CF<sub>3</sub>SO<sub>2</sub>OCF<sub>3</sub> (0.3 mL, 1.79 g/mL, 2.5 mmol) was added in one portion via syringe. After 5 mins, the reaction mixture was gradually warmed to 10 °C overnight, quenched by water (30 mL) (*Caution! This should be carried out in a fume hood because of the rapid release of gasses*), and extracted with DCM (2  $\times$  30 mL). The organic layers were washed with water (50 mL), dried over anhydrous Na<sub>2</sub>SO<sub>4</sub>, and concentrated under the reduced pressure. The residual was purified by column chromatography on silica gel using petroleum ether / ethyl acetate = 20 : 1 (v / v) as eluent to give the trifluoromethoxylated products.

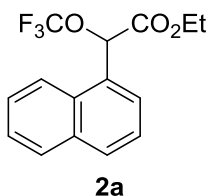

Ethyl 2-(naphthalen-1-yl)-2-(trifluoromethoxy)acetate (**2a**), colorless oil, 119 mg, 75% yield. <sup>1</sup>H NMR (500 MHz, CDCl<sub>3</sub>)  $\delta$  8.18 (d,  $J$  = 8.5 Hz, 1H), 7.91 (t,  $J$  = 7.5 Hz, 2H), 7.66 (d,  $J$  = 7.0 Hz, 1H), 7.60 (t,  $J$  = 7.1 Hz, 1H), 7.54 (t,  $J$  = 7.0 Hz, 1H), 7.50 (t,  $J$  = 8.0 Hz, 1H), 6.15 (s, 1H), 4.25 (m, 1H), 4.18 (m, 1H), 1.18 (t,  $J$  = 7.0 Hz, 3H). <sup>19</sup>F NMR (471 MHz, CDCl<sub>3</sub>)  $\delta$  -59.1 (s, 3F). <sup>13</sup>C NMR (126 MHz, CDCl<sub>3</sub>)  $\delta$  167.7, 133.9, 130.5, 130.3, 129.3, 128.9, 127.1, 127.0, 126.1, 125.1, 123.3, 121.5 (q,  $J$  = 258.4 Hz), 75.6 (q,  $J$  = 3.7 Hz), 51.4, 13.7. IR (KBr): 3055, 2985, 2942, 2906, 2876, 1761, 1514, 1466, 1447, 1394, 1371, 1346, 1275, 1225, 1152, 1087, 1059, 1021, 955, 901, 891, 799, 791, 776, 740 cm<sup>-1</sup>. HRMS-EI (m/z) calcd. for C<sub>15</sub>H<sub>13</sub>F<sub>3</sub>O<sub>3</sub>: 298.0817, found: 298.0817.

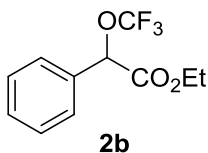

Ethyl 2-phenyl-2-(trifluoromethoxy)acetate (**2b**), colorless oil, 77 mg, 62% yield.  $^1\text{H}$  NMR (500 MHz,  $\text{CDCl}_3$ )  $\delta$  7.47 (m, 2H), 7.42-7.40 (m, 3H), 5.53 (s, 1H), 4.24 (m, 2H), 1.25 (t,  $J = 7.2$  Hz, 3H).  $^{19}\text{F}$  NMR (471 MHz,  $\text{CDCl}_3$ )  $\delta$  -59.3 (s, 3F).  $^{13}\text{C}$  NMR (126 MHz,  $\text{CDCl}_3$ )  $\delta$  167.5, 133.2, 129.7, 128.9, 127.1, 121.4 (q,  $J = 258.4$  Hz), 77.0 (q,  $J = 2.8$  Hz), 62.2, 13.9. IR (KBr): 3072, 3038, 2978, 2966, 2928, 2856, 1764, 1745, 1498, 1458, 1373, 1263, 1226, 1180, 1152, 1058, 1025, 799, 732, 697  $\text{cm}^{-1}$ . HRMS-EI ( $m/z$ ) calcd. for  $\text{C}_{11}\text{H}_{11}\text{F}_3\text{O}_3$ : 248.0660, found: 248.0660.

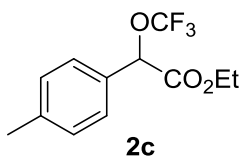

Ethyl 2-(*p*-tolyl)-2-(trifluoromethoxy)acetate (**2c**), colorless oil, 79 mg, 60% yield.  $^1\text{H}$  NMR (500 MHz,  $\text{CDCl}_3$ )  $\delta$  7.35 (d,  $J = 8.0$  Hz, 2H), 7.21 (d,  $J = 8.0$  Hz, 2H), 5.49 (s, 1H), 4.23 (m, 2H), 2.37 (s, 3H), 1.25 (t,  $J = 7.0$  Hz, 3H).  $^{19}\text{F}$  NMR (471 MHz,  $\text{CDCl}_3$ )  $\delta$  -59.2 (s, 3F).  $^{13}\text{C}$  NMR (126 MHz,  $\text{CDCl}_3$ )  $\delta$  167.7, 139.8, 130.3, 129.6, 127.1, 121.4 (q,  $J = 258.4$  Hz), 76.9 (q,  $J = 2.6$  Hz), 62.1, 21.2, 13.9. IR (KBr): 2982, 2963, 2932, 2908, 2860, 1764, 1746, 1516, 1448, 1374, 1281, 1262, 1225, 1180, 1151, 1052, 1022, 806  $\text{cm}^{-1}$ . HRMS-EI ( $m/z$ ) calcd. for  $\text{C}_{12}\text{H}_{13}\text{F}_3\text{O}_3$ : 262.0817, found: 262.0813.

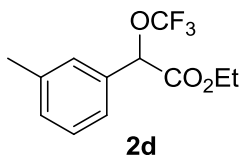

Ethyl 2-(*m*-tolyl)-2-(trifluoromethoxy)acetate (**2d**), colorless oil, 69 mg, 53% yield.  $^1\text{H}$  NMR (500 MHz,  $\text{CDCl}_3$ )  $\delta$  7.23-7.16 (m, 3H), 7.13 (d,  $J = 7.5$  Hz, 1H), 5.41 (s, 1H), 4.16 (m, 2H), 2.29 (s, 3H), 1.17 (t,  $J = 7.0$  Hz, 3H).  $^{19}\text{F}$  NMR (471 MHz,  $\text{CDCl}_3$ )  $\delta$  -59.2 (s, 3F).  $^{13}\text{C}$  NMR (126 MHz,  $\text{CDCl}_3$ )  $\delta$  167.6, 138.8, 133.1, 130.5, 128.8, 127.6, 124.2, 121.4 (q,  $J = 258.4$  Hz), 77.0 (m), 62.1, 21.3, 13.9. IR (KBr): 3064, 2985, 2943, 2909, 2841, 1762, 1604, 1590, 1493, 1468, 1459, 1440, 1375, 1262, 1225, 1150, 1096, 1049, 1023, 964, 900, 854, 784, 741, 692  $\text{cm}^{-1}$ . HRMS-ESI ( $m/z$ ) calcd. for  $[\text{C}_{12}\text{H}_{14}\text{F}_3\text{O}_3]^+$  ( $[\text{M} + \text{H}]^+$ ): 263.0890, found: 263.0905.

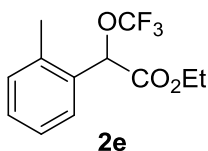

Ethyl 2-(*o*-tolyl)-2-(trifluoromethoxy)acetate (**2e**), colorless oil, 109 mg, 83% yield.  $^1\text{H}$  NMR (500 MHz,  $\text{CDCl}_3$ )  $\delta$  7.44 (d,  $J = 7.5$  Hz, 1H), 7.31-7.21 (m, 3H), 5.76 (s, 1H), 4.24 (m, 2H), 2.45 (s, 3H), 1.24 (t,  $J = 7.0$  Hz, 3H).  $^{19}\text{F}$  NMR (471 MHz,  $\text{CDCl}_3$ )  $\delta$  -59.3 (s, 3F).  $^{13}\text{C}$  NMR (126 MHz,  $\text{CDCl}_3$ )  $\delta$  167.8, 136.2, 131.9, 130.9, 129.6, 127.6, 126.6, 121.5 (q,  $J = 258.4$  Hz), 74.2 (q,  $J = 2.8$  Hz), 62.1, 19.1, 13.9. IR (KBr): 3070, 3029, 2986, 2941, 2910, 2876, 1764, 1744, 1607, 1494, 1466, 1448, 1374, 1282, 1225, 1151, 1053, 1023, 902, 743  $\text{cm}^{-1}$ . HRMS-EI ( $m/z$ ) calcd. for  $\text{C}_{12}\text{H}_{13}\text{F}_3\text{O}_3$ : 262.0817, found: 262.0815.

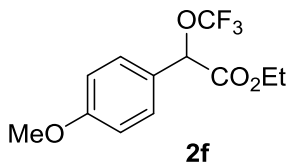

Ethyl 2-(4-methoxyphenyl)-2-(trifluoromethoxy)acetate (**2f**), colorless oil, 101 mg, 73% yield.  $^1\text{H}$  NMR (500 MHz,  $\text{CDCl}_3$ )  $\delta$  7.38 (d,  $J = 9.0$  Hz, 2H), 6.92 (d,  $J = 9.0$  Hz, 2H), 5.48 (s, 1H), 4.23 (m, 2H), 3.82 (s, 3H), 1.25 (t,  $J = 7.5$  Hz, 3H).  $^{19}\text{F}$  NMR (471 MHz,  $\text{CDCl}_3$ )  $\delta$  -59.1 (s, 3F).  $^{13}\text{C}$  NMR (126 MHz,  $\text{CDCl}_3$ )  $\delta$  167.7, 160.7, 128.7, 125.3, 121.4 (q,  $J = 265.7$  Hz), 114.3, 76.7 (m), 62.1, 55.3, 13.9. IR (KBr): 2985, 2941, 2910, 2842, 1761, 1613, 1588, 1516, 1466, 1445, 1395, 1374, 1252, 1225, 1178, 1151, 1116, 1032, 957, 902, 872, 852, 835, 810, 797, 751, 641, 547  $\text{cm}^{-1}$ . HRMS-EI ( $m/z$ ) calcd. for  $\text{C}_{12}\text{H}_{13}\text{F}_3\text{O}_4$ : 278.0766, found: 278.0759.

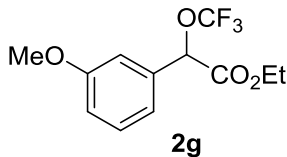

Ethyl 2-(3-methoxyphenyl)-2-(trifluoromethoxy)acetate (**2g**), colorless oil, 81 mg, 58% yield.  $^1\text{H}$  NMR (500 MHz,  $\text{CDCl}_3$ )  $\delta$  7.31 (t,  $J = 8.0$  Hz, 1H), 7.03 (d,  $J = 7.8$  Hz, 1H),

6.99 (m, 1H), 6.93 (dd,  $J = 8.2$  Hz,  $J = 1.8$  Hz, 1H), 5.49 (s, 1H), 4.24 (m, 2H), 3.82 (s, 3H), 1.25 (t,  $J = 7.1$  Hz, 3H).  $^{19}\text{F}$  NMR (471 MHz,  $\text{CDCl}_3$ )  $\delta$  -59.3 (s, 3F).  $^{13}\text{C}$  NMR (126 MHz,  $\text{CDCl}_3$ )  $\delta$  167.4, 159.9, 134.5, 129.9, 121.4 (q,  $J = 258.4$  Hz), 119.3, 115.4, 112.3, 76.8 (q,  $J = 2.8$  Hz), 62.2, 55.3, 13.9. IR (KBr): 2985, 2965, 2928, 2873, 1763, 1611, 1490, 1466, 1448, 1373, 1355, 1264, 1225, 1194, 1154, 1097, 1049, 1025, 969, 896, 854, 787, 759, 740, 696, 569  $\text{cm}^{-1}$ . HRMS-EI ( $m/z$ ) calcd. for  $\text{C}_{12}\text{H}_{13}\text{F}_3\text{O}_4$ : 278.0766, found: 278.0765.

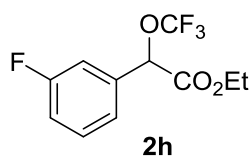

Ethyl 2-(3-fluorophenyl)-2-(trifluoromethoxy)acetate (**2h**), colorless oil, 51 mg, 38% yield.  $^1\text{H}$  NMR (500 MHz,  $\text{CDCl}_3$ )  $\delta$  7.40 (m, 1H), 7.27 (d,  $J = 7.7$  Hz, 1H), 7.22 (d,  $J = 9.3$  Hz, 1H), 7.12 (t,  $J = 7.6$  Hz, 1H), 5.54 (s, 1H), 4.27 (m, 2H), 1.27 (t,  $J = 7.0$  Hz, 3H).  $^{19}\text{F}$  NMR (471 MHz,  $\text{CDCl}_3$ )  $\delta$  -59.5 (s, 3F), -111.5 (m, 1F).  $^{13}\text{C}$  NMR (126 MHz,  $\text{CDCl}_3$ )  $\delta$  167.0, 162.8 (d,  $J = 248.3$  Hz), 135.4 (d,  $J = 8.2$  Hz), 130.6 (d,  $J = 8.2$  Hz), 122.6 (d,  $J = 2.8$  Hz), 121.4 (q,  $J = 258.4$  Hz), 116.7 (d,  $J = 20.9$  Hz), 114.1 (d,  $J = 23.6$  Hz), 76.1 (m), 62.4, 13.9. IR (KBr): 3073, 2987, 2942, 2911, 1765, 1748, 1618, 1596, 1491, 1453, 1374, 1263, 1227, 1195, 1156, 1095, 1062, 1023, 972, 899, 876, 787, 744, 686  $\text{cm}^{-1}$ . HRMS-EI ( $m/z$ ) calcd. for  $\text{C}_{11}\text{H}_{10}\text{F}_4\text{O}_3$ : 266.0566, found: 266.0555.

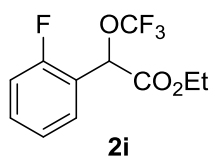

Ethyl 2-(2-fluorophenyl)-2-(trifluoromethoxy)acetate (**2i**), colorless oil, 117 mg, 88% yield.  $^1\text{H}$  NMR (500 MHz,  $\text{CDCl}_3$ )  $\delta$  7.47 (t,  $J = 7.2$  Hz, 1H), 7.40 (q,  $J = 6.9$  Hz, 1H), 7.20 (t,  $J = 7.5$  Hz, 1H), 7.12 (t,  $J = 9.2$  Hz, 1H), 5.87 (s, 1H), 4.26 (m, 2H), 1.25 (t,  $J = 7.2$  Hz, 3H).  $^{19}\text{F}$  NMR (471 MHz,  $\text{CDCl}_3$ )  $\delta$  -59.6 (s, 3F), -117.8 (m, 1F).  $^{13}\text{C}$  NMR (126 MHz,  $\text{CDCl}_3$ )  $\delta$  166.9, 160.0 (d,  $J = 250.2$  Hz), 131.7 (d,  $J = 8.2$  Hz), 128.8 (d,  $J = 1.8$  Hz), 124.7 (d,  $J = 3.7$  Hz), 121.2 (d,  $J = 13.7$  Hz), 121.4 (q,  $J = 258.4$  Hz), 115.9 (d,  $J = 20.9$  Hz), 70.4 (m), 62.4, 13.9. IR (KBr): 3080, 2987, 2942, 2909, 2877, 1766, 1619,

1593, 1496, 1461, 1375, 1268, 1227, 1156, 1100, 1062, 1022, 945, 902, 853, 823, 758, 648  $\text{cm}^{-1}$ . HRMS-EI ( $m/z$ ) calcd. for  $\text{C}_{11}\text{H}_{10}\text{F}_4\text{O}_3$ : 266.0566, found: 266.0564.

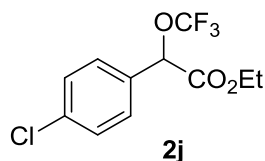

Ethyl 2-(4-chlorophenyl)-2-(trifluoromethoxy)acetate (**2j**), colorless oil, 100 mg, 71% yield.  $^1\text{H}$  NMR (500 MHz,  $\text{CDCl}_3$ )  $\delta$  7.42-7.38 (m, 4H), 5.50 (s, 1H), 4.23 (m, 2H), 1.25 (t,  $J = 7.1$  Hz, 3H).  $^{19}\text{F}$  NMR (471 MHz,  $\text{CDCl}_3$ )  $\delta$  -59.3 (s, 3F).  $^{13}\text{C}$  NMR (126 MHz,  $\text{CDCl}_3$ )  $\delta$  167.1, 135.8, 131.8, 129.2, 128.4, 121.4 (q,  $J = 258.4$  Hz), 76.2 (q,  $J = 2.8$  Hz), 62.4, 13.9. IR (KBr): 2986, 2941, 2911, 2876, 1764, 1599, 1494, 1414, 1374, 1279, 1260, 1227, 1179, 1155, 1094, 1063, 1017, 904, 874, 831, 766, 621  $\text{cm}^{-1}$ . HRMS-EI ( $m/z$ ) calcd. for  $\text{C}_{11}\text{H}_{10}\text{ClF}_3\text{O}_3$ : 282.0271, found: 282.0264.

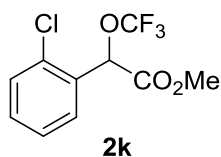

Methyl 2-(2-chlorophenyl)-2-(trifluoromethoxy)acetate (**2k**), colorless oil, 72 mg, 54% yield.  $^1\text{H}$  NMR (500 MHz,  $\text{CDCl}_3$ )  $\delta$  7.53 (d,  $J = 6.8$  Hz, 1H), 7.43 (d,  $J = 7.3$  Hz, 1H), 7.34 (m, 2H), 6.08 (s, 1H), 3.78 (s, 3H).  $^{19}\text{F}$  NMR (471 MHz,  $\text{CDCl}_3$ )  $\delta$  -59.5 (s, 3F).  $^{13}\text{C}$  NMR (126 MHz,  $\text{CDCl}_3$ )  $\delta$  167.4, 133.4, 131.6, 131.0, 129.9, 128.9, 127.5, 121.4 (q,  $J = 257.9$  Hz), 73.2 (q,  $J = 2.7$  Hz), 53.1. IR (KBr): 3070, 3007, 2959, 2930, 2853, 1769, 1595, 1577, 1480, 1447, 1439, 1366, 1274, 1259, 1225, 1156, 1069, 1051, 1040, 1012, 990, 755  $\text{cm}^{-1}$ . HRMS-EI ( $m/z$ ) calcd. for  $\text{C}_{10}\text{H}_8\text{ClF}_3\text{O}_3$ : 268.0114, found: 268.0111.

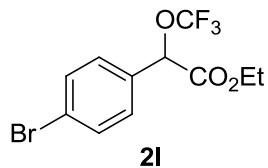

Ethyl 2-(4-bromophenyl)-2-(trifluoromethoxy)acetate (**2l**), colorless oil, 128 mg, 79% yield.  $^1\text{H}$  NMR (500 MHz,  $\text{CDCl}_3$ )  $\delta$  7.42-7.36 (m, 4H), 5.50 (s, 1H), 4.23 (m, 2H), 1.24

(t,  $J = 7.0$  Hz, 3H).  $^{19}\text{F}$  NMR (471 MHz,  $\text{CDCl}_3$ )  $\delta$  -59.3 (s, 3F).  $^{13}\text{C}$  NMR (126 MHz,  $\text{CDCl}_3$ )  $\delta$  167.1, 135.8, 131.8, 129.2, 128.4, 121.4 (q,  $J = 258.4$  Hz), 76.2 (q,  $J = 2.8$  Hz), 62.4, 13.9. IR (KBr): 3069, 3038, 2986, 2941, 2905, 1763, 1598, 1494, 1468, 1458, 1414, 1375, 1261, 1225, 1179, 1154, 1093, 1063, 1016, 968, 873, 828, 777, 698  $\text{cm}^{-1}$ . HRMS-ESI (m/z) calcd. for  $[\text{C}_{11}\text{H}_{11}\text{BrF}_3\text{O}_3]^+$  ( $\text{M} + \text{H}^+$ ): 326.9838, found: 326.9833.

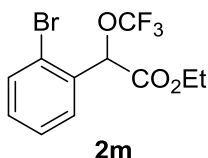

Ethyl 2-(2-bromophenyl)-2-(trifluoromethoxy)acetate (**2m**), colorless oil, 119 mg, 73% yield.  $^1\text{H}$  NMR (500 MHz,  $\text{CDCl}_3$ )  $\delta$  7.64 (d,  $J = 8.1$  Hz, 1H), 7.57 (d,  $J = 7.8$  Hz, 1H), 7.40 (t,  $J = 7.7$  Hz, 1H), 7.29 (t,  $J = 8.1$  Hz, 1H), 6.09 (s, 1H), 4.27 (m, 2H), 1.27 (t,  $J = 7.0$  Hz, 3H).  $^{19}\text{F}$  NMR (471 MHz,  $\text{CDCl}_3$ )  $\delta$  -59.3 (s, 3F).  $^{13}\text{C}$  NMR (126 MHz,  $\text{CDCl}_3$ )  $\delta$  166.9, 133.4, 133.2, 131.1, 129.0, 128.1, 123.3, 121.4 (q,  $J = 259.3$  Hz), 75.6 (q,  $J = 2.6$  Hz), 62.4, 13.9. IR (KBr): 3068, 2986, 2941, 2910, 2876, 1764, 1591, 1573, 1475, 1444, 1374, 1357, 1274, 1225, 1185, 1156, 1096, 1066, 1025, 947, 902, 753  $\text{cm}^{-1}$ . HRMS-EI (m/z) calcd. for  $\text{C}_{11}\text{H}_{10}\text{BrF}_3\text{O}_3$ : 325.9765, found: 325.9760.

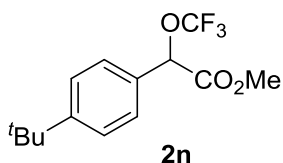

Methyl 2-(4-(tert-butyl)phenyl)-2-(trifluoromethoxy)acetate (**2n**), colorless oil, 97 mg, 67% yield.  $^1\text{H}$  NMR (500 MHz,  $\text{CDCl}_3$ )  $\delta$  7.43 (d,  $J = 8.2$  Hz, 2H), 7.38 (d,  $J = 8.1$  Hz, 2H), 5.53 (s, 1H), 3.78 (s, 3H), 1.32 (s, 9H).  $^{19}\text{F}$  NMR (471 MHz,  $\text{CDCl}_3$ )  $\delta$  -59.3 (s, 3F).  $^{13}\text{C}$  NMR (126 MHz,  $\text{CDCl}_3$ )  $\delta$  168.2, 153.0, 130.0, 126.9, 125.9, 121.4 (q,  $J = 258.4$  Hz), 52.9, 34.7, 31.2. IR (KBr): 3037, 2963, 2909, 2871, 1769, 1751, 1614, 1518, 1462, 1439, 1366, 1262, 1226, 1151, 1107, 1058, 1018, 872, 828, 801, 776  $\text{cm}^{-1}$ . HRMS-EI (m/z) calcd. for  $\text{C}_{14}\text{H}_{17}\text{F}_3\text{O}_3$ : 290.1130, found: 290.1119.

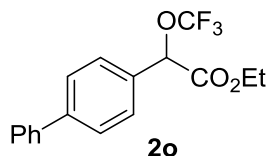

Ethyl 2-([1,1'-biphenyl]-4-yl)-2-(trifluoromethoxy)acetate (**2o**), white solid, 124 mg, 77% yield. M.p.: 47-48 °C.  $^1\text{H}$  NMR (500 MHz,  $\text{CDCl}_3$ )  $\delta$  7.64 (d,  $J = 7.8$  Hz, 2H), 7.60 (d,  $J = 7.8$  Hz, 2H), 7.55 (d,  $J = 7.8$  Hz, 2H), 7.46 (t,  $J = 7.5$  Hz, 2H), 7.38 (t,  $J = 7.5$  Hz, 1H), 5.60 (s, 1H), 4.28 (m, 2H), 1.29 (t,  $J = 7.0$  Hz, 3H).  $^{19}\text{F}$  NMR (471 MHz,  $\text{CDCl}_3$ )  $\delta$  -59.2 (s, 3F).  $^{13}\text{C}$  NMR (126 MHz,  $\text{CDCl}_3$ )  $\delta$  167.6, 142.7, 140.2, 132.1, 128.9, 127.8, 127.7, 127.5, 127.2, 121.5 (q,  $J = 258.0$  Hz), 76.8 (m), 62.3, 14.0. IR (KBr): 3060, 3034, 2984, 2965, 2939, 2910, 2875, 1762, 1744, 1613, 1602, 1568, 1521, 1488, 1449, 1413, 1373, 1354, 1260, 1224, 1178, 1149, 1096, 1055, 1021, 903, 874, 839, 810, 760, 737, 697  $\text{cm}^{-1}$ . HRMS-ESI ( $m/z$ ) calcd. for  $[\text{C}_{17}\text{H}_{19}\text{F}_3\text{NO}_3]^+$  ( $[\text{M} + \text{NH}_4]^+$ ): 342.1312, found: 342.1311.

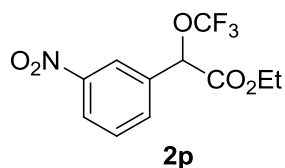

Ethyl 2-(3-nitrophenyl)-2-(trifluoromethoxy)acetate (**2p**), colorless oil, 37 mg, 27% yield.  $^1\text{H}$  NMR (500 MHz,  $\text{CDCl}_3$ )  $\delta$  8.36 (s, 1H), 8.29 (d,  $J = 8.1$  Hz, 1H), 7.83 (d,  $J = 7.7$  Hz, 1H), 7.63 (t,  $J = 8.1$  Hz, 1H), 5.63 (s, 1H), 4.27 (m, 2H), 1.27 (t,  $J = 7.2$  Hz, 3H).  $^{19}\text{F}$  NMR (471 MHz,  $\text{CDCl}_3$ )  $\delta$  -59.5 (s, 3F).  $^{13}\text{C}$  NMR (126 MHz,  $\text{CDCl}_3$ )  $\delta$  166.5, 148.5, 135.3, 132.7, 130.1, 124.6, 122.1, 121.3 (q,  $J = 259.4$  Hz), 75.6 (q,  $J = 2.8$  Hz), 62.8, 13.9. IR (KBr): 2963, 2925, 2854, 1761, 1659, 1632, 1536, 1469, 1447, 1412, 1372, 1353, 1261, 1094, 1021, 864, 801, 732, 699  $\text{cm}^{-1}$ . HRMS-ESI ( $m/z$ ) calcd. for  $[\text{C}_{11}\text{H}_{11}\text{F}_3\text{NO}_5]^+$  ( $[\text{M} + \text{H}]^+$ ): 294.0584, found: 294.0603.

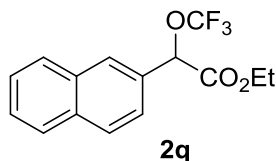

Ethyl 2-(naphthalen-2-yl)-2-(trifluoromethoxy)acetate (**2q**), white solid, 100 mg, 67% yield. M.p.: 30-31 °C.  $^1\text{H}$  NMR (500 MHz,  $\text{CDCl}_3$ )  $\delta$  7.96 (s, 1H), 7.91-7.86 (m, 3H), 7.59-7.53 (m, 3H), 5.72 (s, 1H), 4.26 (m, 2H), 1.25 (t,  $J = 7.0$  Hz, 3H).  $^{19}\text{F}$  NMR (471 MHz,  $\text{CDCl}_3$ )  $\delta$  -59.1 (s, 3F).  $^{13}\text{C}$  NMR (126 MHz,  $\text{CDCl}_3$ )  $\delta$  167.6, 133.7, 133.0, 130.6, 129.0, 128.3, 127.8, 127.1, 127.0, 126.8, 123.8, 121.5 (q,  $J = 258.4$  Hz), 77.2 (q,  $J = 2.8$  Hz), 62.3, 13.9. IR (KBr): 3061, 2963, 2907, 2875, 2856, 1766, 1603, 1511, 1467, 1446, 1372, 1348, 1261, 1227, 1096, 1020, 889, 861, 804, 752  $\text{cm}^{-1}$ . HRMS-ESI (m/z) calcd. for  $[\text{C}_{15}\text{H}_{13}\text{F}_3\text{O}_3\text{Na}]^+$  ( $[\text{M} + \text{Na}]^+$ ): 321.0709, found: 321.0725.

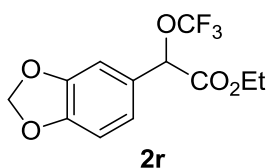

Ethyl 2-(benzo[d][1,3]dioxol-5-yl)-2-(trifluoromethoxy)acetate (**2r**), colorless oil, 105 mg, 72% yield.  $^1\text{H}$  NMR (500 MHz,  $\text{CDCl}_3$ )  $\delta$  6.94 (s, 1H), 6.92 (d,  $J = 8.3$  Hz, 1H), 6.81 (d,  $J = 7.9$  Hz, 1H), 5.99 (s, 2H), 5.42 (s, 1H), 4.23 (m, 2H), 1.26 (t,  $J = 7.2$  Hz, 3H).  $^{19}\text{F}$  NMR (471 MHz,  $\text{CDCl}_3$ )  $\delta$  -59.1 (s, 3F).  $^{13}\text{C}$  NMR (126 MHz,  $\text{CDCl}_3$ )  $\delta$  167.5, 148.9, 148.2, 126.8, 121.5, 121.4 (q,  $J = 258.4$  Hz), 108.5, 107.4, 101.5, 76.8 (q,  $J = 2.8$  Hz), 62.2, 13.9. IR (KBr): 3080, 2987, 2940, 2907, 2783, 1761, 1611, 1506, 1493, 1449, 1373, 1349, 1248, 1225, 1180, 1152, 1105, 1040, 933, 899, 866, 854, 808, 770, 754, 679, 652  $\text{cm}^{-1}$ . HRMS-ESI (m/z) calcd. for  $[\text{C}_{12}\text{H}_{11}\text{F}_3\text{O}_5\text{Na}]^+$  ( $[\text{M} + \text{Na}]^+$ ): 315.0451, found: 315.0439.

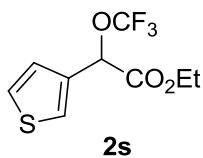

Ethyl 2-(thiophen-3-yl)-2-(trifluoromethoxy)acetate (**2s**), colorless oil, 70 mg, 55% yield.  $^1\text{H}$  NMR (500 MHz,  $\text{CDCl}_3$ )  $\delta$  7.45 (d,  $J = 2.1$  Hz, 1H), 7.36 (dd,  $J = 4.9$  Hz,  $J = 3.2$  Hz, 1H), 7.16 (d,  $J = 5.0$  Hz, 1H), 5.64 (s, 1H), 4.27 (m, 2H), 1.28 (t,  $J = 7.1$  Hz, 3H).  $^{19}\text{F}$  NMR (471 MHz,  $\text{CDCl}_3$ )  $\delta$  -59.4 (s, 3F).  $^{13}\text{C}$  NMR (126 MHz,  $\text{CDCl}_3$ )  $\delta$  167.2, 133.4, 127.0, 125.9, 124.9, 121.4 (q,  $J = 258.0$  Hz), 73.2 (q,  $J = 2.7$  Hz), 62.3, 14.0. IR (KBr):



3111, 2984, 2959, 2925, 2854, 1764, 1467, 1448, 1419, 1394, 1373, 1349, 1270, 1224, 1152, 1096, 1084, 1055, 1025, 968, 930, 900, 846, 787, 724, 713, 692, 643  $\text{cm}^{-1}$ . HRMS-ESI ( $m/z$ ) calcd for  $\text{C}_9\text{H}_9\text{F}_3\text{O}_3\text{S}$  ( $\text{M}^+$ ): 254.0225, found: 254.0212.

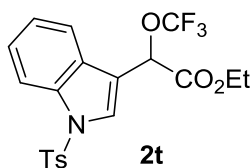

Ethyl 2-(1-tosyl-1H-indol-3-yl)-2-(trifluoromethoxy)acetate (**2t**), colorless oil, 198 mg, 90% yield. A mixture of petroleum ether / ethyl acetate = 5 : 1 (v / v) was used as eluent for column chromatography.  $^1\text{H}$  NMR (500 MHz,  $\text{CDCl}_3$ )  $\delta$  7.88 (d,  $J$  = 8.4 Hz, 1H), 7.70 (d,  $J$  = 8.2, 2H), 7.67 (s, 1H), 7.61 (d,  $J$  = 8.0 Hz, 1H), 7.28 (t,  $J$  = 7.8 Hz, 1H), 7.22-7.16 (m, 3H), 5.69 (s, 1H), 4.17 (m, 2H), 2.28 (s, 3H), 1.16 (t,  $J$  = 7.0 Hz, 3H).  $^{19}\text{F}$  NMR (471 MHz,  $\text{CDCl}_3$ )  $\delta$  -59.4 (s, 3F).  $^{13}\text{C}$  NMR (126 MHz,  $\text{CDCl}_3$ )  $\delta$  166.8, 145.5, 135.1, 134.9, 130.1, 127.7, 127.0, 126.0, 125.5, 123.8, 121.4 (q,  $J$  = 258.4 Hz), 120.3, 114.7, 113.7, 71.1 (q,  $J$  = 2.7 Hz), 62.5, 21.6, 13.9. IR (KBr): 3361, 3112, 2982, 2922, 2851, 1761, 1659, 1633, 1597, 1566, 1494, 1469, 1448, 1375, 1278, 1259, 1223, 1190, 1176, 1123, 1099, 1085, 1047, 1021, 981, 898, 853, 813, 748, 704, 666, 599  $\text{cm}^{-1}$ . HRMS-ESI ( $m/z$ ) calcd. for  $[\text{C}_{20}\text{H}_{18}\text{F}_3\text{NO}_5\text{SNa}]^+$  ( $[\text{M} + \text{Na}]^+$ ): 464.0750, found: 464.0759.

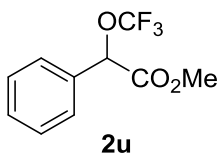

Methyl 2-phenyl-2-(trifluoromethoxy)acetate (**2u**), colorless oil, 70 mg, 60% yield.  $^1\text{H}$  NMR (400 MHz,  $\text{CDCl}_3$ )  $\delta$  7.47 (m, 2H), 7.42-7.40 (m, 3H), 5.56 (s, 1H), 3.77 (s, 3H).  $^{19}\text{F}$  NMR (377 MHz,  $\text{CDCl}_3$ )  $\delta$  -59.3 (s, 3F).  $^{13}\text{C}$  NMR (100 MHz,  $\text{CDCl}_3$ ):  $\delta$  168.0, 133.1, 129.7, 128.9, 127.1, 121.4 (q,  $J$  = 259.4 Hz), 76.8 (q,  $J$  = 2.6 Hz), 52.9. IR (KBr): 3070, 3039, 3019, 2961, 2903, 1768, 1589, 1498, 1458, 1439, 1366, 1261, 1227, 1151, 1084, 1059, 1031, 1015, 989, 942, 865, 799, 735, 697, 648  $\text{cm}^{-1}$ . HRMS-EI ( $m/z$ ) calcd. for  $\text{C}_{10}\text{H}_9\text{F}_3\text{O}_3$ : 234.0504, found: 234.0510.

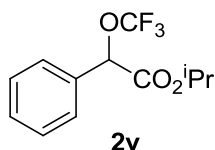

Isopropyl 2-phenyl-2-(trifluoromethoxy)acetate (**2v**), colorless oil, 79 mg, 60% yield.  $^1\text{H}$  NMR (500 MHz,  $\text{CDCl}_3$ )  $\delta$  7.46 (m, 2H), 7.40-7.39 (m, 3H), 5.49 (s, 1H), 5.08 (m, 1H), 1.27 (d,  $J = 6.2$  Hz, 3H), 1.16 (d,  $J = 6.3$  Hz, 3H).  $^{19}\text{F}$  NMR (471 MHz,  $\text{CDCl}_3$ )  $\delta$  -59.2 (s, 3F).  $^{13}\text{C}$  NMR (126 MHz,  $\text{CDCl}_3$ ):  $\delta$  167.1, 133.3, 129.6, 128.9, 127.0, 121.5 (q,  $J = 258.4$  Hz), 77.1 (q,  $J = 2.8$  Hz), 70.1, 21.5, 21.3. IR (KBr): 3070, 3038, 2986, 2940, 2881, 1759, 1740, 1495, 1468, 1458, 1377, 1262, 1226, 1180, 1152, 1105, 1058, 1030, 1017, 970, 920, 867, 832, 735, 697  $\text{cm}^{-1}$ . HRMS-EI ( $m/z$ ) calcd. for  $\text{C}_{12}\text{H}_{13}\text{F}_3\text{O}_3$ : 262.0817, found: 262.0814.

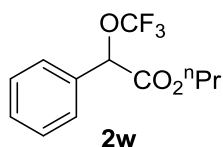

Propyl 2-phenyl-2-(trifluoromethoxy)acetate (**2w**), colorless oil, 69 mg, 53% yield.  $^1\text{H}$  NMR (500 MHz,  $\text{CDCl}_3$ )  $\delta$  7.46 (m, 2H), 7.40 (m, 3H), 5.54 (s, 1H), 4.14 (t,  $J = 6.5$  Hz, 2H), 1.63 (m, 2H), 0.86 (t,  $J = 7.3$  Hz, 3H).  $^{19}\text{F}$  NMR (471 MHz,  $\text{CDCl}_3$ )  $\delta$  -59.3 (s, 3F).  $^{13}\text{C}$  NMR (126 MHz,  $\text{CDCl}_3$ ):  $\delta$  167.6, 133.3, 129.7, 128.9, 127.0, 121.4 (q,  $J = 257.5$  Hz), 76.9 (q,  $J = 2.7$  Hz), 67.6, 21.8, 10.0. IR (KBr): 3070, 3039, 2971, 2941, 2902, 2884, 2859, 1765, 1746, 1498, 1458, 1393, 1381, 1363, 1262, 1227, 1177, 1152, 1107, 1084, 1059, 1032, 1004, 979, 936, 865, 795, 733, 697, 649  $\text{cm}^{-1}$ . HRMS-ESI ( $m/z$ ) calcd. for  $[\text{C}_{12}\text{H}_{13}\text{F}_3\text{O}_3\text{Na}]^+$  ( $M + \text{Na}^+$ ): 285.0709, found: 285.0712.

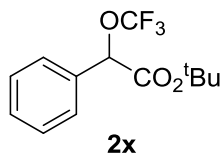

*Tert*-butyl 2-phenyl-2-(trifluoromethoxy)acetate (**2x**), colorless oil, 124 mg, 90% yield.  $^1\text{H}$  NMR (500 MHz,  $\text{CDCl}_3$ )  $\delta$  7.46 (m, 2H), 7.40 (m, 3H), 5.41 (s, 1H), 1.43 (s, 9H).  $^{19}\text{F}$  NMR (471 MHz,  $\text{CDCl}_3$ )  $\delta$  -59.1 (s, 3F).  $^{13}\text{C}$  NMR (126 MHz,  $\text{CDCl}_3$ ):  $\delta$  166.6, 133.6,

129.4, 128.8, 127.0, 121.5 (q,  $J = 257.4$  Hz), 83.3, 77.3 (m), 27.7. IR (KBr): 3070, 3038, 2982, 2964, 2931, 2873, 2856, 1759, 1489, 1478, 1458, 1396, 1371, 1262, 1228, 1150, 1106, 1085, 1060, 1030, 960, 899, 867, 839, 800, 750, 697  $\text{cm}^{-1}$ . HRMS-ESI ( $m/z$ ) calcd. for  $[\text{C}_{13}\text{H}_{16}\text{F}_3\text{O}_3]^+$  ( $[\text{M} + \text{H}]^+$ ): 277.1046, found: 277.1045.

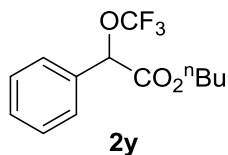

Butyl 2-phenyl-2-(trifluoromethoxy)acetate (**2y**), colorless oil, 113 mg, 82% yield.  $^1\text{H}$  NMR (500 MHz,  $\text{CDCl}_3$ )  $\delta$  7.46 (m, 2H), 7.40 (m, 3H), 5.53 (s, 1H), 4.18 (t,  $J = 6.5$  Hz, 2H), 1.59 (m, 2H), 1.29 (m, 2H), 0.87 (t,  $J = 7.3$  Hz, 3H).  $^{19}\text{F}$  NMR (471 MHz,  $\text{CDCl}_3$ )  $\delta$  -59.3 (s, 3F).  $^{13}\text{C}$  NMR (126 MHz,  $\text{CDCl}_3$ ):  $\delta$  167.6, 133.3, 129.7, 128.9, 127.0, 121.4 (q,  $J = 257.5$  Hz), 76.9 (q,  $J = 2.8$  Hz), 66.0, 30.4, 18.8, 13.5. IR (KBr): 3070, 3038, 2963, 2935, 2877, 2853, 1765, 1745, 1498, 1468, 1458, 1390, 1364, 1263, 1226, 1152, 1084, 1062, 1030, 1019, 964, 894, 866, 802, 732, 697  $\text{cm}^{-1}$ . HRMS-EI ( $m/z$ ) calcd. for  $\text{C}_{13}\text{H}_{15}\text{F}_3\text{O}_3$ : 276.0973, found: 276.0981.

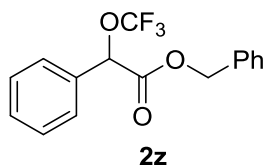

Benzyl 2-phenyl-2-(trifluoromethoxy)acetate (**2z**), colorless oil, 119 mg, 77% yield.  $^1\text{H}$  NMR (500 MHz,  $\text{CDCl}_3$ )  $\delta$  7.43 (m, 2H), 7.39-7.37 (m, 3H), 7.31-7.30 (m, 3H), 7.22 (m, 2H), 5.58 (s, 1H), 5.22 (d,  $J = 12.4$  Hz, 1H), 5.22 (d,  $J = 12.4$  Hz, 1H).  $^{19}\text{F}$  NMR (471 MHz,  $\text{CDCl}_3$ )  $\delta$  -59.2 (s, 3F).  $^{13}\text{C}$  NMR (126 MHz,  $\text{CDCl}_3$ ):  $\delta$  167.4, 134.8, 133.1, 129.8, 129.0, 128.6, 128.6, 128.1, 127.1, 121.5 (q,  $J = 258.4$  Hz), 76.9 (q,  $J = 2.7$  Hz), 67.7. IR (KBr): 3093, 3068, 3037, 2958, 2856, 1764, 1498, 1457, 1382, 1362, 1282, 1263, 1226, 1152, 1082, 1061, 1030, 1003, 969, 864, 735, 696  $\text{cm}^{-1}$ . HRMS-EI ( $m/z$ ) calcd. for  $\text{C}_{16}\text{H}_{13}\text{F}_3\text{O}_3$ : 310.0817, found: 310.0815.

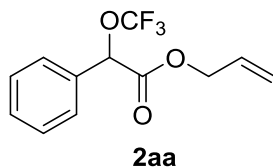

Allyl 2-phenyl-2-(trifluoromethoxy)acetate (**2aa**), colorless oil, 91 mg, 70% yield.  $^1\text{H}$  NMR (500 MHz,  $\text{CDCl}_3$ )  $\delta$  7.47 (m, 2H), 7.42-7.41 (m, 3H), 5.85 (m, 1H), 5.57 (s, 1H), 5.24 (dd,  $J = 11.4$  Hz,  $J = 1.2$  Hz, 1H), 5.21 (dm,  $J = 4.6$  Hz, 1H), 4.67 (m, 2H).  $^{19}\text{F}$  NMR (471 MHz,  $\text{CDCl}_3$ )  $\delta$  -59.3 (s, 3F).  $^{13}\text{C}$  NMR (126 MHz,  $\text{CDCl}_3$ ):  $\delta$  167.2, 133.1, 130.9, 129.7, 128.9, 127.1, 121.4 (q,  $J = 257.5$  Hz), 119.0, 76.9 (q,  $J = 2.8$  Hz), 66.4. IR (KBr): 3071, 3038, 2961, 2880, 1765, 1650, 1498, 1458, 1416, 1374, 1263, 1227, 1153, 1085, 1059, 1031, 986, 939, 865, 797, 736, 697  $\text{cm}^{-1}$ . HRMS-EI ( $m/z$ ) calcd. for  $\text{C}_{12}\text{H}_{11}\text{F}_3\text{O}_3$ : 260.0660, found: 260.0658.

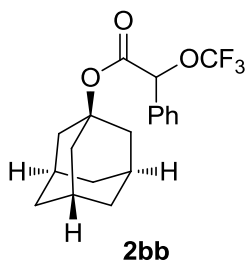

Adamantan-1-yl 2-phenyl-2-(trifluoromethoxy)acetate (**2bb**), colorless oil, 118 mg, 67% yield.  $^1\text{H}$  NMR (500 MHz,  $\text{CDCl}_3$ )  $\delta$  7.45 (m, 2H), 7.40-7.39 (m, 3H), 5.40 (s, 1H), 2.15 (m, 3H), 2.06 (m, 6H), 1.64 (m, 6H).  $^{19}\text{F}$  NMR (471 MHz,  $\text{CDCl}_3$ )  $\delta$  -59.0 (s, 3F).  $^{13}\text{C}$  NMR (126 MHz,  $\text{CDCl}_3$ ):  $\delta$  166.2, 133.8, 129.4, 128.8, 127.0, 121.5 (q,  $J = 258.4$  Hz), 83.3, 77.2 (m), 41.0, 36.0, 30.9. IR (KBr): 3068, 3037, 2915, 2855, 1758, 1736, 1498, 1457, 1367, 1355, 1346, 1325, 1315, 1286, 1260, 1226, 1177, 1151, 1104, 1083, 1051, 966, 936, 903, 863, 814, 801, 741, 696  $\text{cm}^{-1}$ . HRMS-ESI ( $m/z$ ) calcd. for  $[\text{C}_{19}\text{H}_{21}\text{F}_3\text{O}_3\text{K}]^+$  ( $[\text{M} + \text{K}]^+$ ): 393.1074, found: 393.1095.

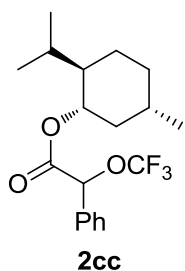

(1*S*,2*R*,5*S*)-2-Isopropyl-5-methylcyclohexyl 2-phenyl-2-(trifluoromethoxy)acetate (**2cc**), colorless oil, 127 mg, 71% yield.  $^1\text{H}$  NMR (500 MHz,  $\text{CDCl}_3$ )  $\delta$  7.46 (m, 2H), 7.40 (m, 3H), 5.52 (s, 0.53H), 5.49 (s, 0.47H), 4.78 (td,  $J = 10.8$  Hz,  $J = 4.3$  Hz, 0.53H), 4.69 (td,  $J = 10.9$  Hz,  $J = 4.2$  Hz, 0.47H), 1.83-1.74 (m, 1H), 1.68-1.66 (m, 2H), 1.47-1.27 (m, 3H), 1.05-0.94 (m, 2H), 0.91 (d,  $J = 6.7$  Hz, 2H), 0.86 (dd,  $J = 6.5$  Hz,  $J = 3.8$  Hz, 4H), 0.69 (dd,  $J = 9.8$  Hz,  $J = 7.8$  Hz, 3H), 0.49 (d,  $J = 6.8$  Hz, 1H).  $^{19}\text{F}$  NMR (471 MHz,  $\text{CDCl}_3$ )  $\delta$  -59.1 (s, 1.4F), -59.3 (s, 1.6F).  $^{13}\text{C}$  NMR (126 MHz,  $\text{CDCl}_3$ ):  $\delta$  167.22, 167.17, 133.51, 133.22, 129.63, 129.53, 128.80, 128.78, 127.17, 126.85, 121.48 (q,  $J = 258.4$  Hz), 121.46 (q,  $J = 257.5$  Hz), 77.11 (m), 77.05 (m), 76.56, 76.39, 47.01, 46.90, 40.51, 40.04, 34.09, 34.07, 31.40, 31.33, 26.14, 25.60, 23.31, 23.07, 21.91, 21.87, 20.61, 20.49, 16.01, 15.65. IR (KBr): 3069, 3038, 2959, 2930, 2872, 1760, 1739, 1498, 1457, 1388, 1371, 1262, 1227, 1177, 1150, 1096, 1059, 1038, 981, 963, 917, 866, 802, 739, 696  $\text{cm}^{-1}$ . HRMS-ESI ( $m/z$ ) calcd. for  $\text{C}_{19}\text{H}_{25}\text{F}_3\text{O}_3$ : 358.1756, found: 358.1767.

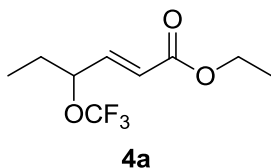

Ethyl (*E*)-4-(trifluoromethoxy)hex-2-enoate (**4a**), colorless oil, 100 mg, 89% yield.  $^1\text{H}$  NMR (500 MHz,  $\text{CDCl}_3$ )  $\delta$  6.83 (dd,  $J = 15.7$  Hz,  $J = 5.7$  Hz, 1H), 6.04 (dd,  $J = 15.7$  Hz,  $J = 1.1$  Hz, 1H), 4.68 (m, 1H), 4.22 (q,  $J = 7.1$  Hz, 2H), 1.76 (m, 2H), 1.30 (t,  $J = 7.2$  Hz, 3H), 0.98 (t,  $J = 7.3$  Hz, 3H).  $^{19}\text{F}$  NMR (471 MHz,  $\text{CDCl}_3$ )  $\delta$  -58.4 (s, 3F).  $^{13}\text{C}$  NMR (126 MHz,  $\text{CDCl}_3$ ):  $\delta$  165.7, 143.7, 122.7, 121.5 (q,  $J = 255.7$  Hz), 78.5 (q,  $J = 2.6$  Hz), 60.7, 27.6, 14.1, 8.8. IR (KBr): 2981, 2942, 2907, 2884, 1726, 1666, 1596, 1465, 1370, 1314, 1273, 1223, 1181, 1145, 1097, 1039, 980, 854, 813  $\text{cm}^{-1}$ . HRMS-EI ( $m/z$ ) calcd. for  $\text{C}_9\text{H}_{13}\text{F}_3\text{O}_3$ : 226.0817, found: 226.0812.

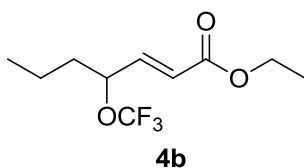

Ethyl (*E*)-4-(trifluoromethoxy)hept-2-enoate (**4b**), colorless oil, 86 mg, 72% yield.  $^1\text{H}$  NMR (500 MHz,  $\text{CDCl}_3$ )  $\delta$  6.83 (dd,  $J = 15.8$  Hz,  $J = 5.7$  Hz, 1H), 6.02 (d,  $J = 15.7$  Hz, 1H), 4.73 (q,  $J = 5.8$  Hz, 1H), 4.21 (q,  $J = 7.0$  Hz, 2H), 1.69 (m, 2H), 1.43 (m, 2H), 1.30 (t,  $J = 7.1$  Hz, 3H), 0.94 (t,  $J = 7.3$  Hz, 3H).  $^{19}\text{F}$  NMR (471 MHz,  $\text{CDCl}_3$ )  $\delta$  -58.4 (s, 3F).  $^{13}\text{C}$  NMR (126 MHz,  $\text{CDCl}_3$ ):  $\delta$  165.7, 144.0, 122.5, 121.5 (q,  $J = 255.7$  Hz), 77.2 (q,  $J = 2.7$  Hz), 60.7, 36.5, 17.8, 14.1, 13.5. IR (KBr): 2965, 2939, 2878, 1727, 1667, 1468, 1369, 1263, 1219, 1180, 1146, 1083, 1040, 980, 898, 864, 807  $\text{cm}^{-1}$ . HRMS-EI ( $m/z$ ) calcd. for  $\text{C}_{10}\text{H}_{15}\text{F}_3\text{O}_3$ : 240.0973, found: 240.0983.

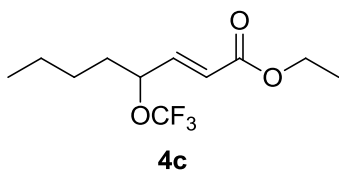

Ethyl (*E*)-4-(trifluoromethoxy)oct-2-enoate (**4c**), colorless oil, 119 mg, 94% yield.  $^1\text{H}$  NMR (500 MHz,  $\text{CDCl}_3$ )  $\delta$  6.83 (dd,  $J = 15.7$  Hz,  $J = 5.6$  Hz, 1H), 6.02 (d,  $J = 15.7$  Hz, 1H), 4.72 (q,  $J = 5.9$  Hz, 1H), 4.21 (q,  $J = 7.0$  Hz, 2H), 1.71 (m, 2H), 1.39-1.32 (m, 4H), 1.29 (t,  $J = 7.1$  Hz, 3H), 0.90 (t,  $J = 6.5$  Hz, 3H).  $^{19}\text{F}$  NMR (471 MHz,  $\text{CDCl}_3$ )  $\delta$  -58.4 (s, 3F).  $^{13}\text{C}$  NMR (126 MHz,  $\text{CDCl}_3$ )  $\delta$  165.7, 144.0, 122.5, 121.5 (q,  $J = 256.5$  Hz), 77.4 (q,  $J = 2.8$  Hz), 60.7, 34.2, 26.6, 22.2, 14.1, 13.7. IR (KBr): 2962, 2936, 2875, 1728, 1667, 1468, 1370, 1263, 1223, 1179, 1147, 1097, 1040, 981, 930, 864, 847, 805  $\text{cm}^{-1}$ . HRMS-ESI ( $m/z$ ) calcd. for  $[\text{C}_{11}\text{H}_{17}\text{F}_3\text{O}_3\text{Na}]^+$  ( $[\text{M} + \text{Na}]^+$ ): 277.1022, found: 277.1046.

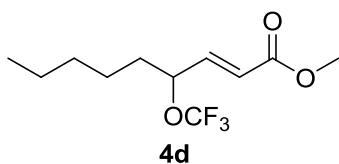

Methyl (*E*)-4-(trifluoromethoxy)non-2-enoate (**4d**), colorless oil, 115 mg, 91% yield.  $^1\text{H}$  NMR (500 MHz,  $\text{CDCl}_3$ )  $\delta$  6.85 (dd,  $J = 15.7$  Hz,  $J = 5.7$  Hz, 1H), 6.04 (d,  $J = 15.7$  Hz,

1H), 4.73 (q,  $J = 6.1$  Hz, 1H), 3.76 (s, 3H), 1.70 (m, 2H), 1.39 (m, 2H), 1.35-1.25 (m, 4H), 0.89 (t,  $J = 5.9$  Hz, 3H).  $^{19}\text{F}$  NMR (471 MHz,  $\text{CDCl}_3$ )  $\delta$  -58.3 (s, 3F).  $^{13}\text{C}$  NMR (126 MHz,  $\text{CDCl}_3$ ):  $\delta$  166.1, 144.3, 122.1, 121.5 (q,  $J = 256.5$  Hz), 77.4 (q,  $J = 2.8$  Hz), 51.8, 34.4, 31.3, 24.1, 22.4, 13.9. IR (KBr): 2957, 2933, 2864, 1732, 1668, 1645, 1460, 1437, 1379, 1315, 1271, 1221, 1203, 1172, 1146, 1094, 1040, 1015, 979, 873, 807  $\text{cm}^{-1}$ . HRMS-ESI ( $m/z$ ) calcd. for  $[\text{C}_{11}\text{H}_{18}\text{F}_3\text{O}_3]^+$  ( $[\text{M} + \text{H}]^+$ ): 255.1203, found: 255.1206.

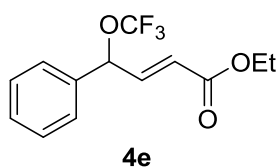

Ethyl (*E*)-4-phenyl-4-(trifluoromethoxy)but-2-enoate (**4e**), colorless oil, 112 mg, 82 % yield.  $^1\text{H}$  NMR (500 MHz,  $\text{CDCl}_3$ )  $\delta$  7.42-7.38 (m, 3H), 7.34 (d,  $J = 7.6$  Hz, 2H), 6.99 (dd,  $J = 15.5$  Hz,  $J = 5.1$  Hz, 1H), 6.12 (d,  $J = 15.7$  Hz, 1H), 5.73 (d,  $J = 5.0$  Hz, 1H), 4.21 (q,  $J = 7.0$  Hz, 2H), 1.30 (t,  $J = 7.1$  Hz, 3H).  $^{19}\text{F}$  NMR (471 MHz,  $\text{CDCl}_3$ )  $\delta$  -58.2 (s, 3F).  $^{13}\text{C}$  NMR (126 MHz,  $\text{CDCl}_3$ ):  $\delta$  165.6, 143.1, 136.0, 129.3, 129.0, 127.0, 122.5, 121.6 (q,  $J = 257.5$  Hz), 78.6 (q,  $J = 2.8$  Hz), 60.9, 14.2. IR (KBr): 3068, 3036, 2985, 2939, 2907, 2876, 1724, 1664, 1496, 1457, 1393, 1370, 1311, 1266, 1223, 1177, 1150, 1097, 1070, 1034, 978, 894, 863, 832, 765, 698  $\text{cm}^{-1}$ . HRMS-ESI ( $m/z$ ) calcd. for  $\text{C}_{13}\text{H}_{13}\text{F}_3\text{O}_3$  ( $\text{M}^+$ ): 274.0817, found: 274.0831.

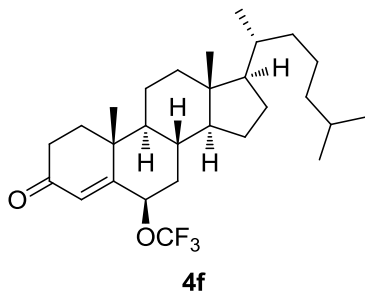

(6*R*,8*S*,9*S*,10*R*,13*R*,14*S*,17*R*)-10,13-Dimethyl-17-((*R*)-6-methylheptan-2-yl)-6-(trifluoromethoxy)-1,2,6,7,8,9,10,11,12,13,14,15,16,17-tetradecahydro-3H-cyclopenta[a]phenanthren-3-one (**4f**),<sup>8</sup> 22.5 mg, 48% yield.  $^1\text{H}$  NMR (500 MHz,  $\text{CDCl}_3$ )  $\delta$  5.87 (s, 1H), 4.75 (m, 1H), 2.54 (td,  $J = 17.0$  Hz,  $J = 4.9$  Hz, 1H), 2.40 (dm,  $J = 17.0$  Hz, 1H), 2.16-2.06 (m, 3H), 1.86 (m, 2H), 1.73 (td,  $J = 14.7$  Hz,  $J = 4.0$  Hz, 1H), 1.60 (m, 1H), 1.55-

1.48 (m, 3H), 1.35-1.26 (m, 9H), 1.20-1.09 (m, 6H), 1.01 (m, 2H), 0.92 (d,  $J = 6.4$  Hz, 3H), 0.87 (d,  $J = 6.4$  Hz, 6H), 0.75 (s, 3H).  $^{19}\text{F}$  NMR (471 MHz,  $\text{CDCl}_3$ )  $\delta$  -57.6 (s, 3F).  $^{13}\text{C}$  NMR (126 MHz,  $\text{CDCl}_3$ ): 199.7, 161.4, 128.6, 79.4 (q,  $J = 2.7$  Hz), 56.1, 55.6, 53.5, 42.5, 39.5, 38.1, 37.3, 37.2, 36.1, 35.7, 34.1, 30.9, 30.0, 28.1, 28.0, 24.0, 23.8, 22.8, 22.6, 20.9, 18.6, 18.6, 12.0. IR (KBr): 2950, 2869, 1689, 1467, 1382, 1366, 1278, 1262, 1231, 1216, 1143, 1071, 914, 801  $\text{cm}^{-1}$ . HRMS-ESI ( $m/z$ ) calcd. for  $[\text{C}_{28}\text{H}_{43}\text{F}_3\text{O}_2\text{Na}]^+$  ( $[\text{M} + \text{Na}]^+$ ): 491.3107, found: 491.3111.

## 6. Control experiments

### 6.1. Trifluoromethoxylation of **1a** by $\text{CF}_3\text{SO}_2\text{OCF}_3$ / AgF in $\text{CD}_3\text{CN}$

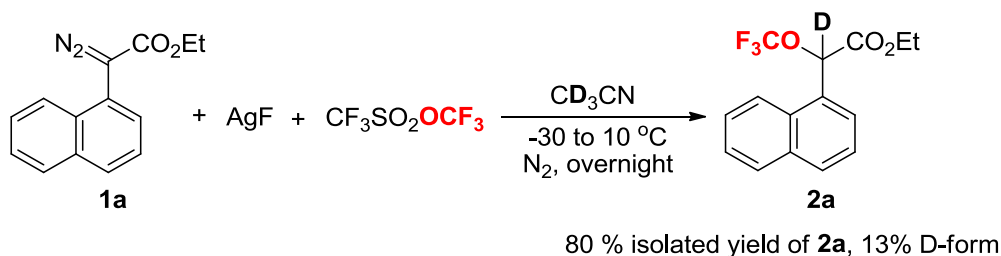

The typical procedure in **5.2.** was used.

**2a**, 48.0 mg, 80% yield, 13% D-form.  $^1\text{H}$  NMR (500 MHz,  $\text{CDCl}_3$ )  $\delta$  8.19 (d,  $J = 8.5$  Hz, 1H), 7.92 (t,  $J = 7.5$  Hz, 2H), 7.67 (d,  $J = 7.0$  Hz, 1H), 7.60 (t,  $J = 7.0$  Hz, 1H), 7.55 (t,  $J = 7.5$  Hz, 1H), 7.51 (t,  $J = 7.9$  Hz, 1H), 6.17 (s, 0.87 H), 4.26 (m, 1H), 4.18 (m, 1H), 1.19 (t,  $J = 7.0$  Hz, 3H).

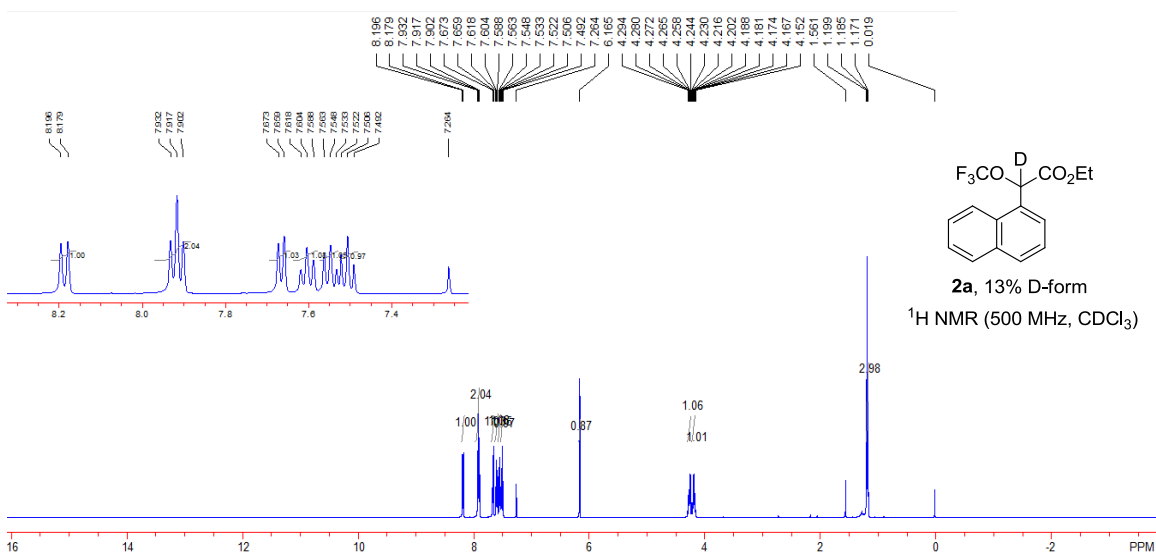



## 6.2. Trifluoromethoxylation of **1a** by CF<sub>3</sub>SO<sub>2</sub>OCF<sub>3</sub> / AgF in CH<sub>3</sub>CN with D<sub>2</sub>O

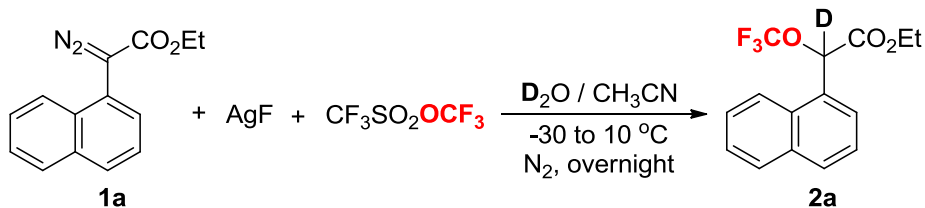

33% isolated yield, 88% D-form

Under a nitrogen atmosphere, an oven-dried tube (20 mL) was charged with AgF (127 mg, 1.0 mmol,) and cooled to -30 °C with stirring. A solution of **1a** (48 mg, 0.2 mmol) and D<sub>2</sub>O 4 µL (4.0 mg, 0.22 mmol) in CH<sub>3</sub>CN (1.0 mL) were added in one portion via syringe. Then CF<sub>3</sub>SO<sub>2</sub>OCF<sub>3</sub> (0.20 mL, 1.6 mmol) was introduced in one portion via syringe. After 5 mins, the reaction mixture was gradually warmed to 10 °C overnight, quenched by water (30 mL), and extracted with DCM (2 × 30 mL). The organic layers were washed with water (50 mL), dried over anhydrous Na<sub>2</sub>SO<sub>4</sub>, and concentrated under the reduced pressure. The residual was purified by column chromatography on silica gel using petroleum ether / ethyl acetate = 20 : 1 as eluent to give **2a** as a colorless liquid (20.0 mg, 0.067 mmol, 33 % yield, 88 % D-form). <sup>1</sup>H NMR (500 MHz, CDCl<sub>3</sub>) δ 8.19 (d, *J* = 8.5 Hz, 1H), 7.92 (t, *J* = 7.5 Hz, 2H), 7.67 (d, *J* = 7.0 Hz, 1H), 7.61 (t, *J* = 7.0 Hz, 1H), 7.55 (t, *J* = 7.5 Hz, 1H), 7.51 (t, *J* = 7.5 Hz, 1H), 6.17 (s, 0.12H), 4.26 (m, 1H), 4.18 (m, 1H), 1.18 (t, *J* = 7.0 Hz, 3H).

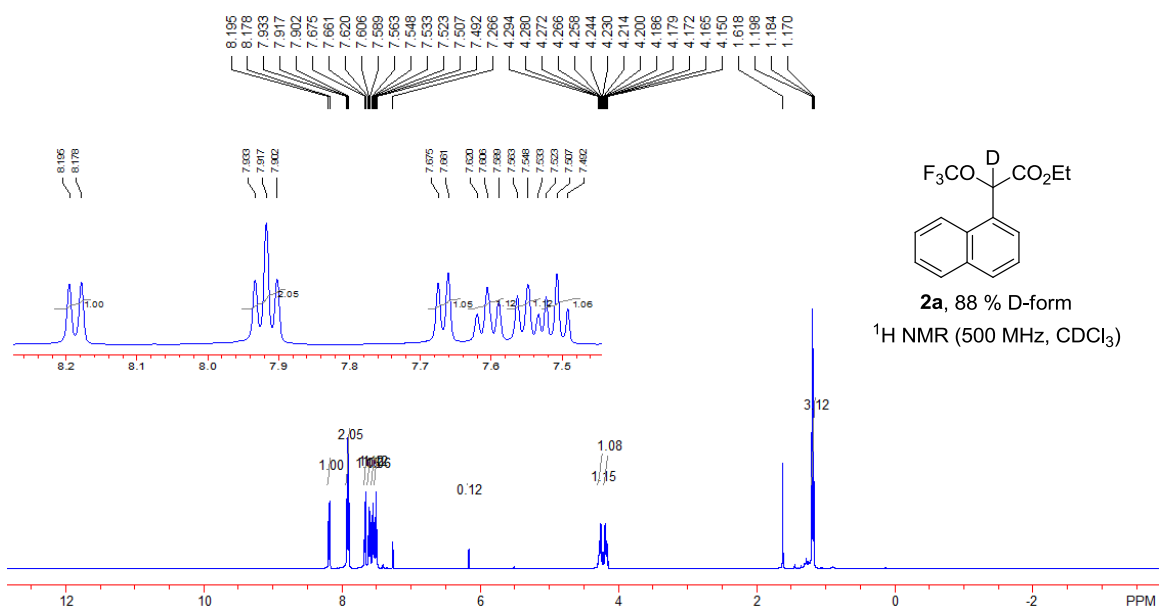

### 6.3. Trifluoromethoxylation of **1a** by $\text{CF}_3\text{SO}_2\text{OCF}_3$ / AgF in $\text{CH}_3\text{CN}$ and quenched by $\text{D}_2\text{O}$

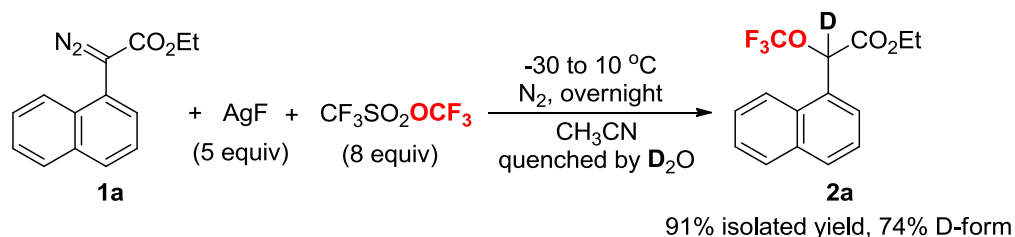

Under a nitrogen atmosphere, an oven-dried tube (20 mL) was charged with AgF (127 mg, 1.0 mmol) and cooled to  $-30\text{ }^\circ\text{C}$  with stirring. A solution of **1a** (48 mg, 0.2 mmol) in  $\text{CH}_3\text{CN}$  (1.0 mL) was added in one portion via syringe. Then  $\text{CF}_3\text{SO}_2\text{OCF}_3$  (0.20 mL, 1.6 mmol) was introduced in one portion via syringe. After 5 mins, the reaction mixture was gradually warmed to  $10\text{ }^\circ\text{C}$  overnight and quenched by  $\text{D}_2\text{O}$  (0.1 mL). Water (30 mL) was added and the mixture was extracted with DCM ( $2 \times 30\text{ mL}$ ). The organic layers were washed with water (50 mL), dried over anhydrous  $\text{Na}_2\text{SO}_4$ , and concentrated under the reduced pressure. The residual was purified by column chromatography on silica gel using petroleum ether / ethyl acetate = 20 : 1 as eluent to give **2a** as a colorless liquid (54.5 mg, 0.18 mmol, 91 % yield, 74 % D-form).  $^1\text{H}$  NMR (500 MHz,  $\text{CDCl}_3$ )  $\delta$  8.19 (d,  $J = 8.5\text{ Hz}$ , 1H), 7.92 (t,  $J = 7.5\text{ Hz}$ , 2H), 7.67 (d,  $J = 7.0\text{ Hz}$ , 1H), 7.61 (t,  $J = 7.0\text{ Hz}$ , 1H),

7.55 (t,  $J = 7.5$  Hz, 1H), 7.51 (t,  $J = 7.0$  Hz, 1H), 6.16 (s, 0.26 H), 4.26 (m, 1H), 4.18 (m, 1H), 1.19 (t,  $J = 7.0$  Hz, 3H).

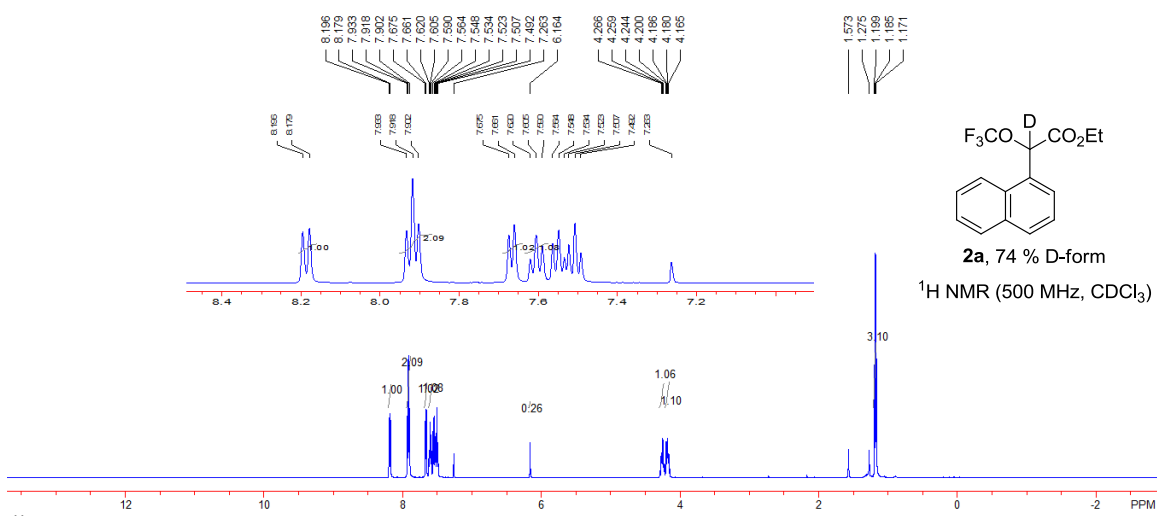

#### 6.4. Trifluoromethoxylation of **3c** by $\text{CF}_3\text{SO}_2\text{OCF}_3$ / AgF in $\text{CH}_3\text{CN}$ with $\text{D}_2\text{O}$

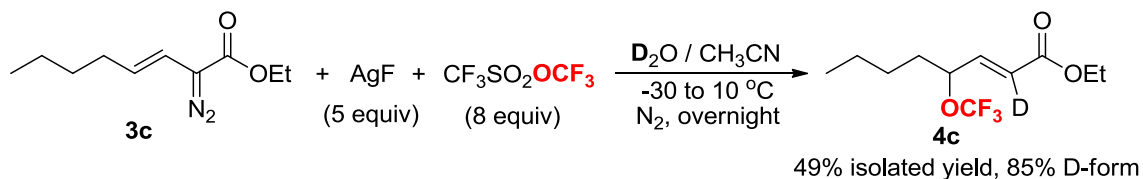

The procedure in **6.2.** was used for **3c**.

**4c**, 25.0 mg, 0.098 mmol, 49 % yield, 85 % D-form.  $^1\text{H}$  NMR (500 MHz,  $\text{CDCl}_3$ )  $\delta$  6.83 (m, 1H), 6.03 (d,  $J = 15.7$  Hz, 0.15 H), 4.73 (q,  $J = 6.1$  Hz, 1H), 4.22 (q,  $J = 7.1$  Hz, 2H), 1.71 (m, 2H), 1.36-1.32 (m, 4H), 1.30 (t,  $J = 7.1$  Hz, 3H), 0.91 (t,  $J = 6.7$  Hz, 3H).

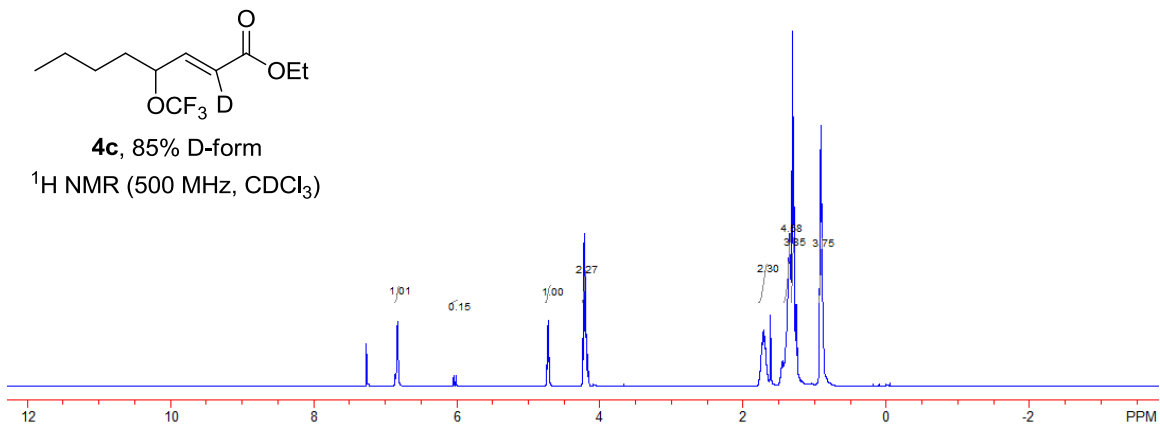

### 6.5. Trifluoromethoxylation of 3c by $\text{CF}_3\text{SO}_2\text{OCF}_3$ / AgF in $\text{CH}_3\text{CN}$ and quenched by $\text{D}_2\text{O}$

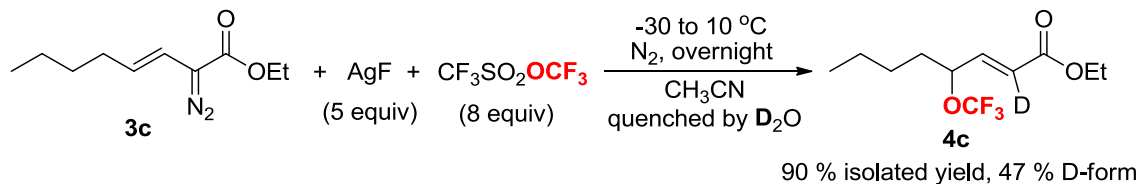

The procedure in **6.3.** was used for **3c**.

**4c**, 46.0 mg, 0.18 mmol, 90 % yield, 47 % D-form. <sup>1</sup>H NMR (500 MHz, CDCl<sub>3</sub>) δ 6.84 (m, 1H), 6.03 (d, *J* = 15.7 Hz, 0.53 H), 4.73 (q, *J* = 6.2 Hz, 1H), 4.22 (q, *J* = 7.0 Hz, 2H), 1.71 (m, 2H), 1.36-1.32 (m, 4H), 1.30 (t, *J* = 7.1 Hz, 3H), 0.91 (t, *J* = 6.7 Hz, 3H).

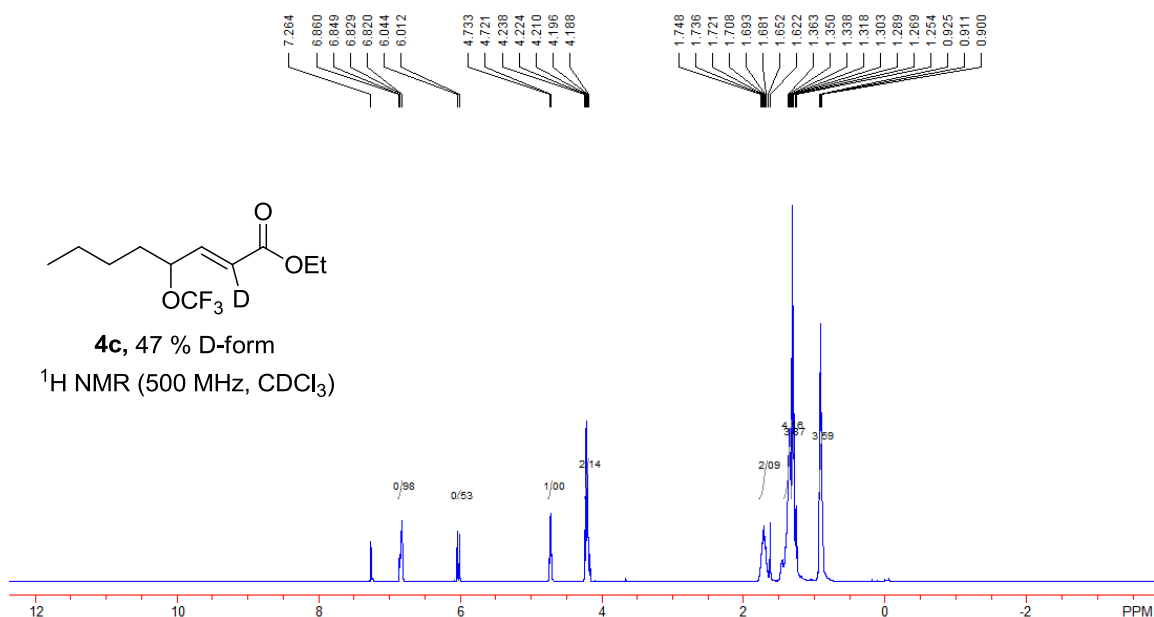

## 6.6. Trifluoromethoxylation of **1a** by CF<sub>3</sub>SO<sub>2</sub>OCF<sub>3</sub> / AgF in CH<sub>3</sub>CN in the presence of TEMPO

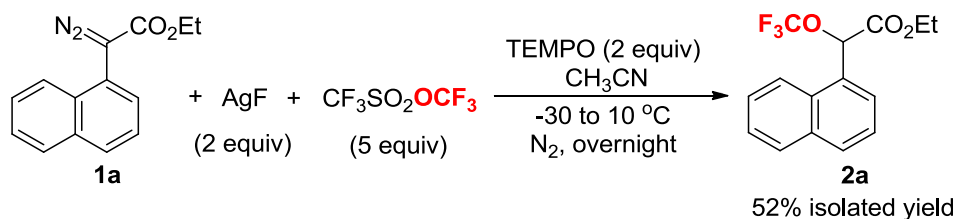

Under a nitrogen atmosphere, an oven-dried tube (20 mL) was charged with AgF (127 mg, 1.0 mmol) and TEMPO (156 mg, 1.0 mmol), and cooled to -30 °C with stirring. A solution of **1a** (120 mg, 0.5 mmol) in CH<sub>3</sub>CN (2.5 mL) was added in one portion via syringe. Then CF<sub>3</sub>SO<sub>2</sub>OCF<sub>3</sub> (0.3 mL, 2.5 mmol) was introduced in one portion via syringe. After 5 mins, the reaction mixture was gradually warmed to 10 °C overnight, quenched by water (30 mL), and extracted with DCM (2 × 30 mL). The organic layers were washed with water (50 mL), dried over anhydrous Na<sub>2</sub>SO<sub>4</sub>, and concentrated under the reduced pressure. The residual was purified by column chromatography on silica gel using petroleum ether / ethyl acetate = 20 : 1 as eluent to give **2a** as a colorless liquid (77.0 mg, 0.26 mmol, 52% yield).

## Reference

1. Zhang, C. -P.; Vicić, D. A. *Organometallics* **2012**, *31*, 7812-7815.
2. Kolomeitsev, A. A.; Vorobyev, M.; Gillandt, H. *Tetrahedron Lett.* **2008**, *49*, 449-454.
3. Armarego, W. L. F.; Chai, C. L. L. *Purification of Laboratory Chemicals*, 5th ed.; Butterworth Heinemann: Oxford, **2003**.
4. Hay, B. P.; Finke, R. G. *J. Am. Chem. Soc.* **1987**, *109*, 8102-8108
5. Hassani, M. O. H.; Germainr, A.; Brunei, D.; Commeyras, A. *Tetrahedron Lett.* **1981**, *22*, 449-454.
6. Hu, M.; He, Z.; Gao, B.; Li, L.; Ni, C.; Hu, J. *J. Am. Chem. Soc.* **2013**, *135*, 17302-17305.
7. (a) Dolye, M. P.; Yan, M.; Hu, W.; Gronenberg, L. S. *J. Am. Chem. Soc.* **2003**, *125*, 4692-4693. (b) Schwartz, B. D.; Denton, J. R.; Lian, Y.; Davies, H. M. L.; Williams, C. M. *J. Am. Chem. Soc.* **2009**, *131*, 8329-8332.
8. (a) Morton, D.; Dick, A. R.; Ghosh, D.; Davies, H. M. L. *Chem. Commun.* **2012**, *48*, 5838-5840. (b) Qin, C.; Davies, H. M. L. *Org. Lett.* **2013**, *15*, 6152-6154.

## 7. NMR spectra of 1o, 1p, 1r, 3b, and 3c

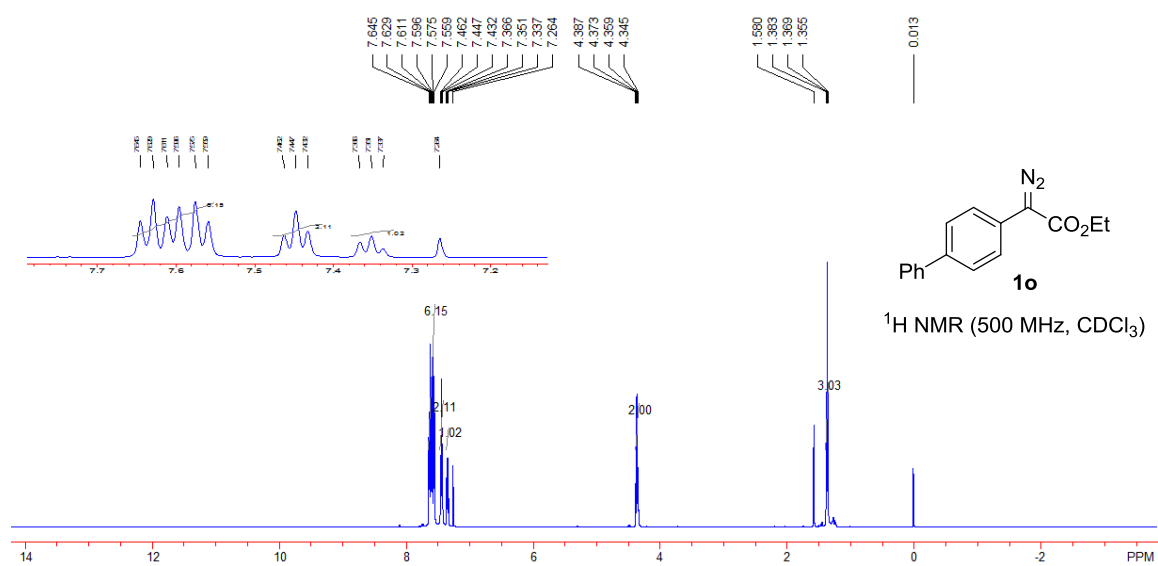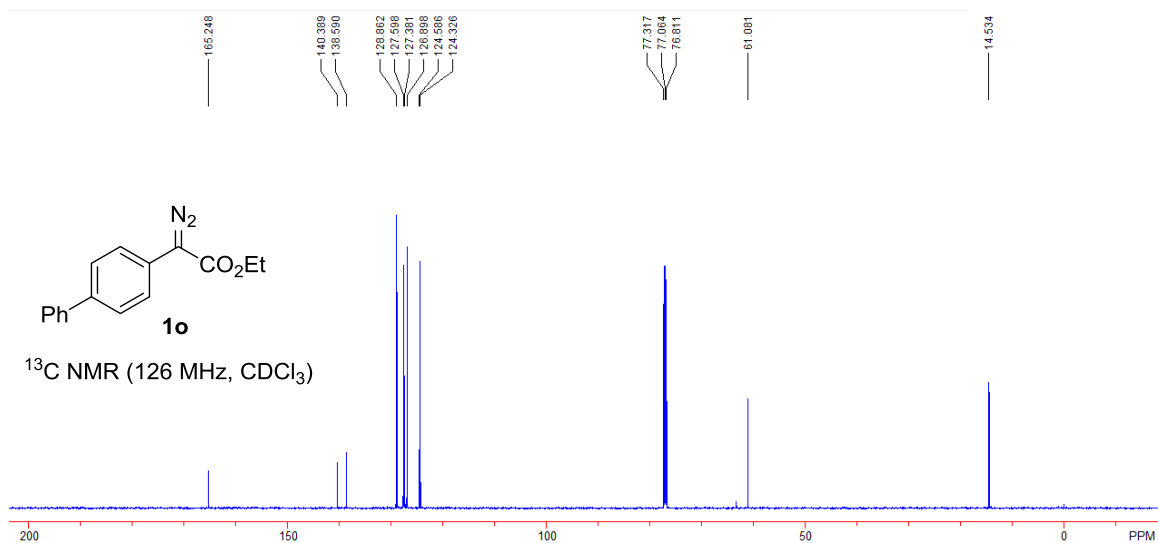

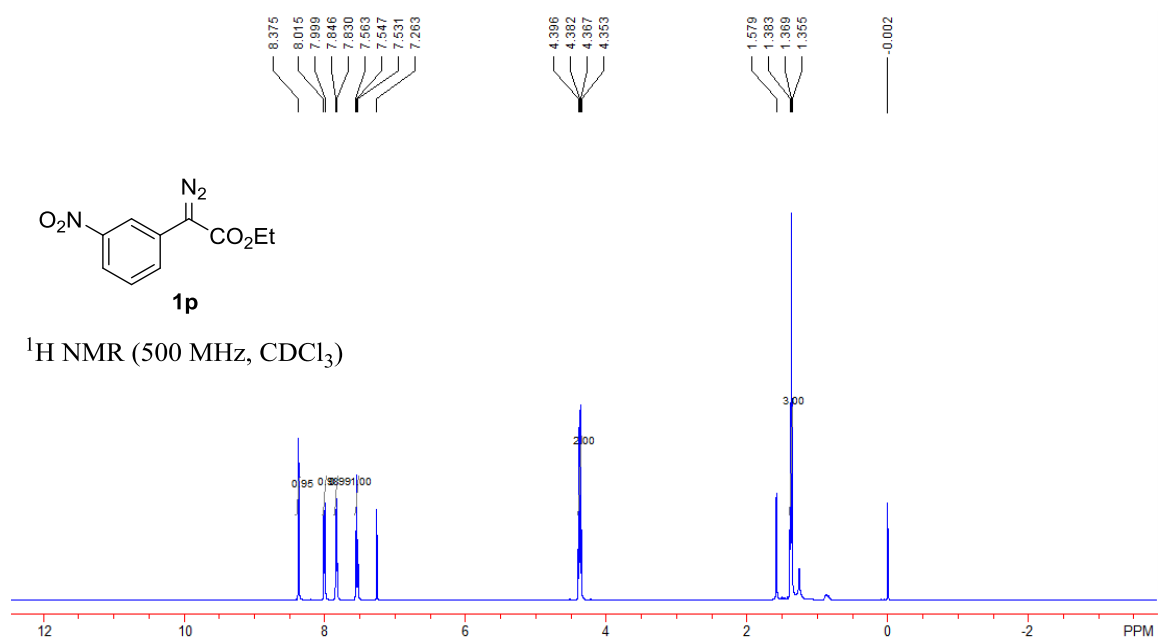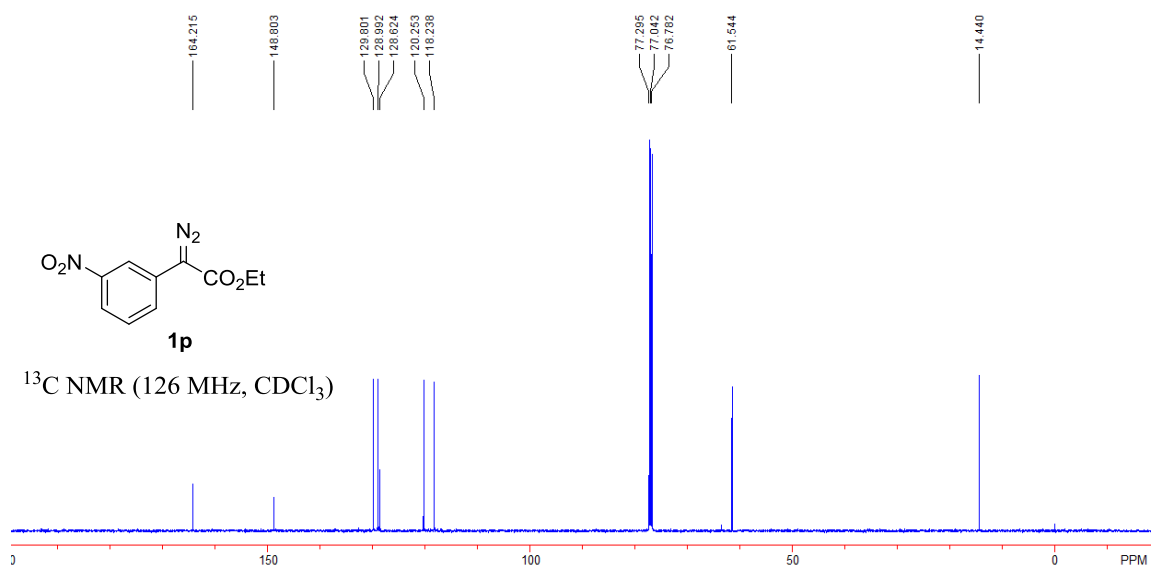



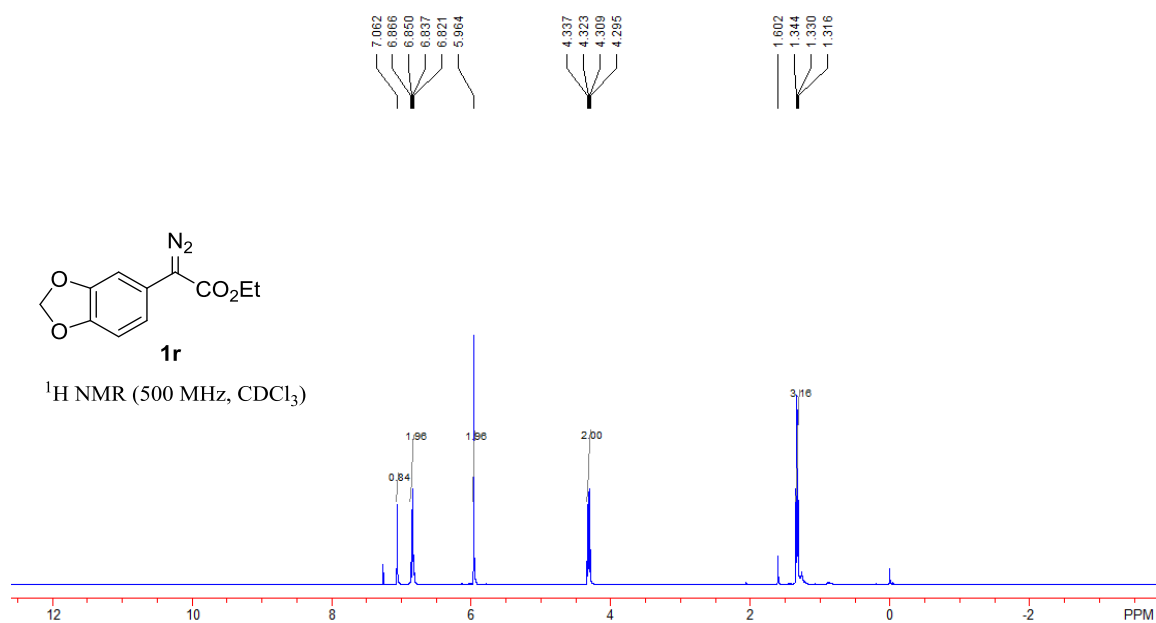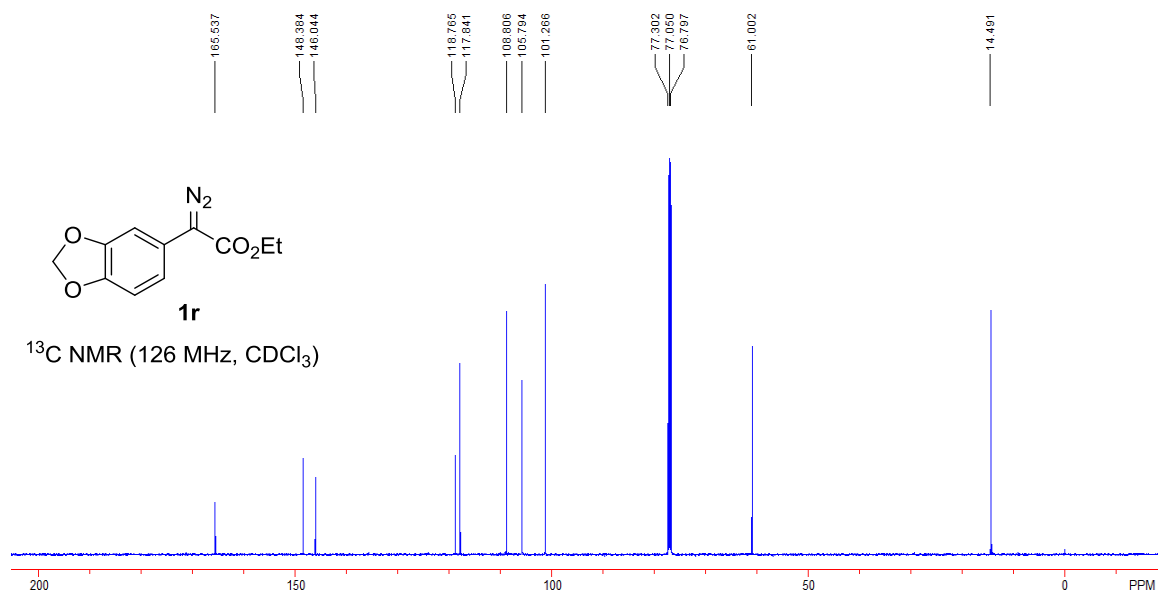

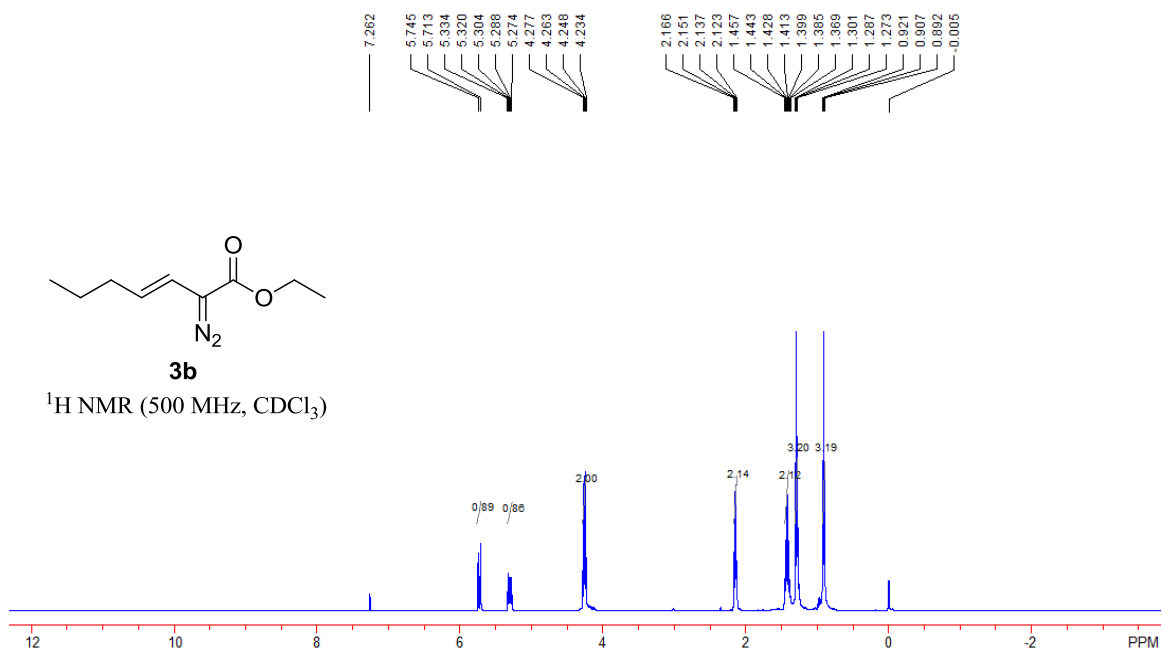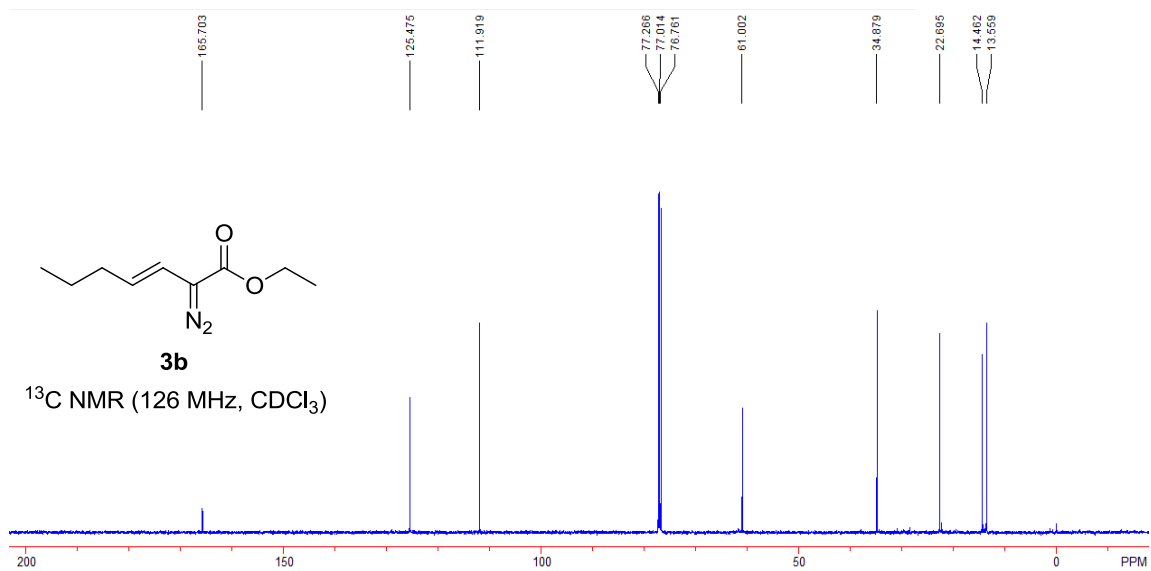

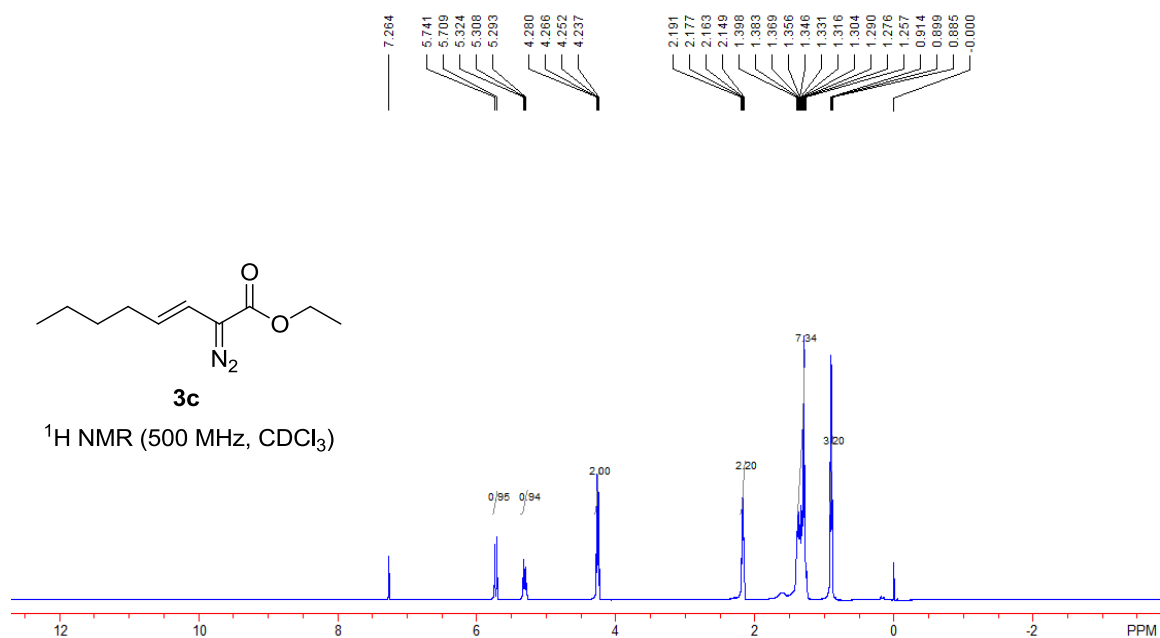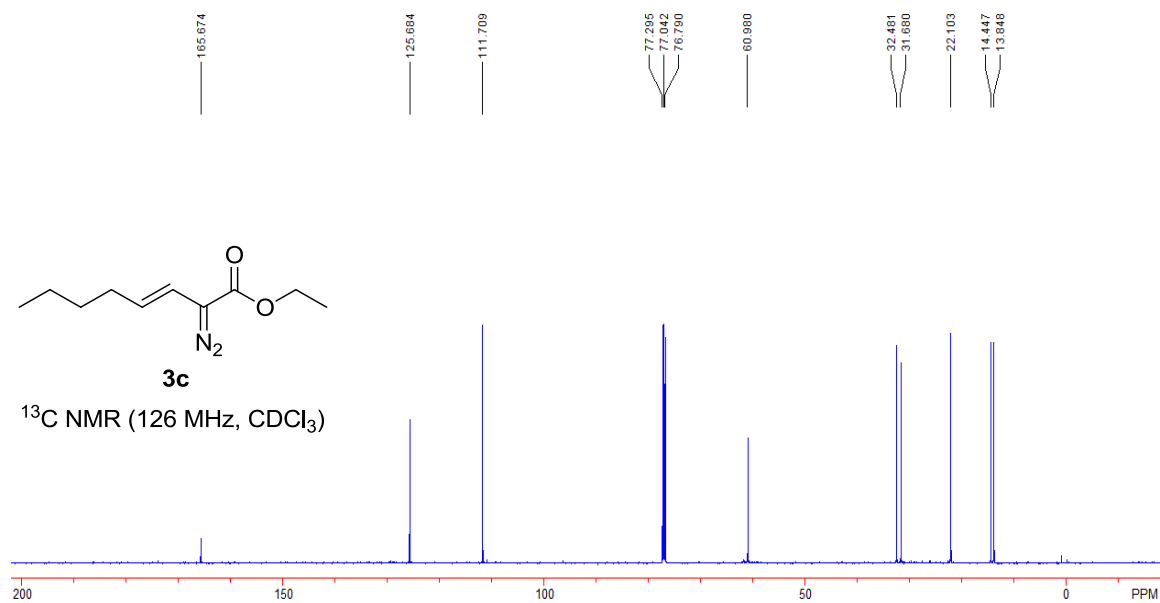

## 8. NMR spectra of 2 and 4

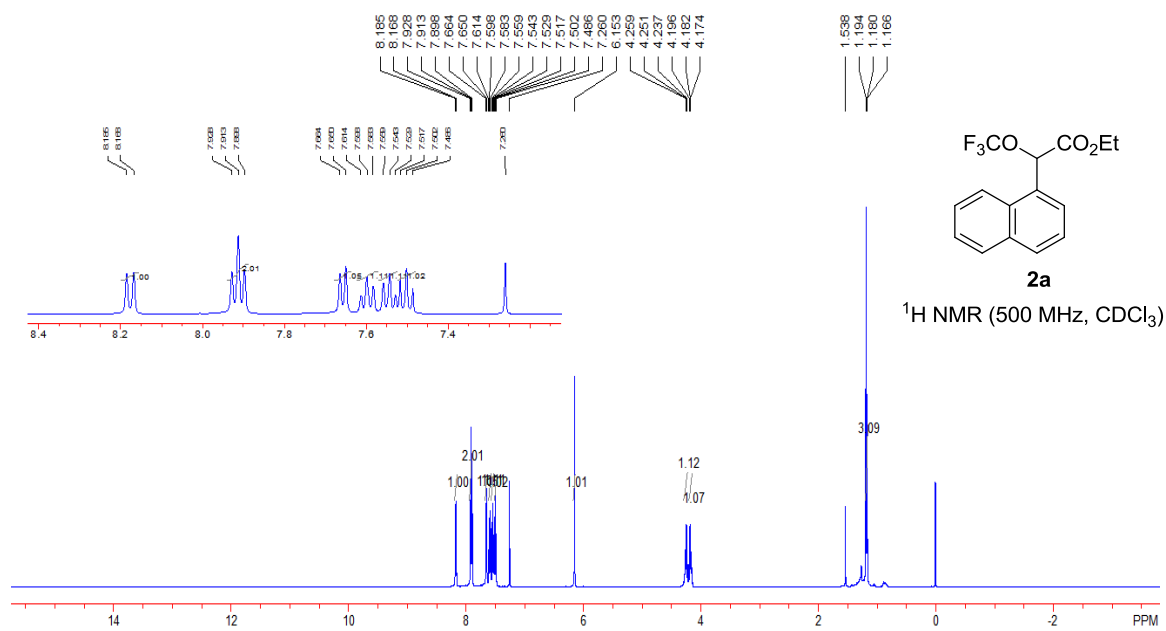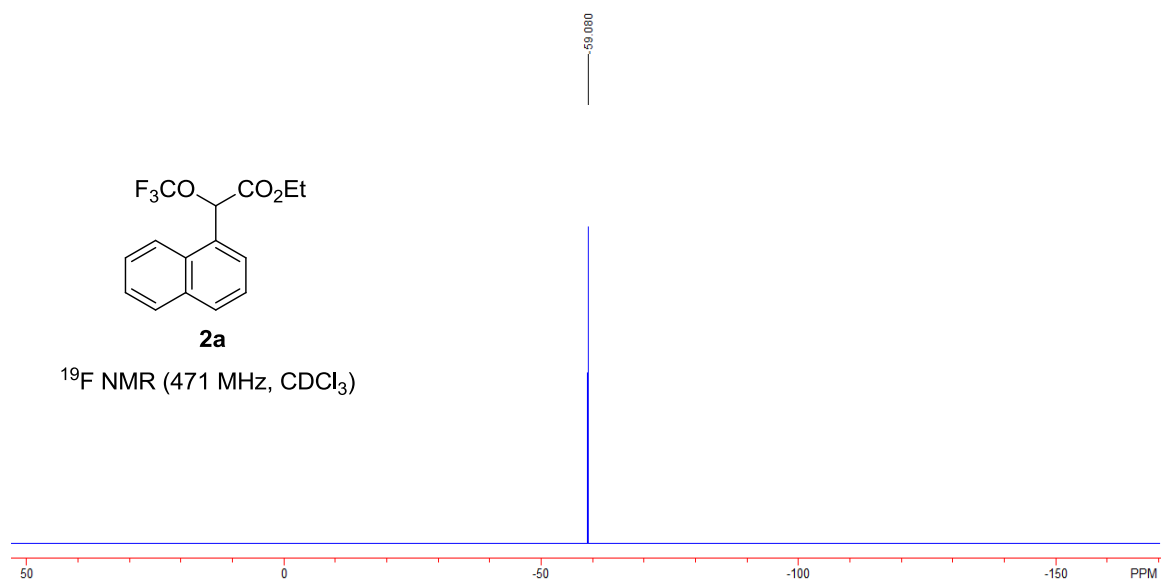

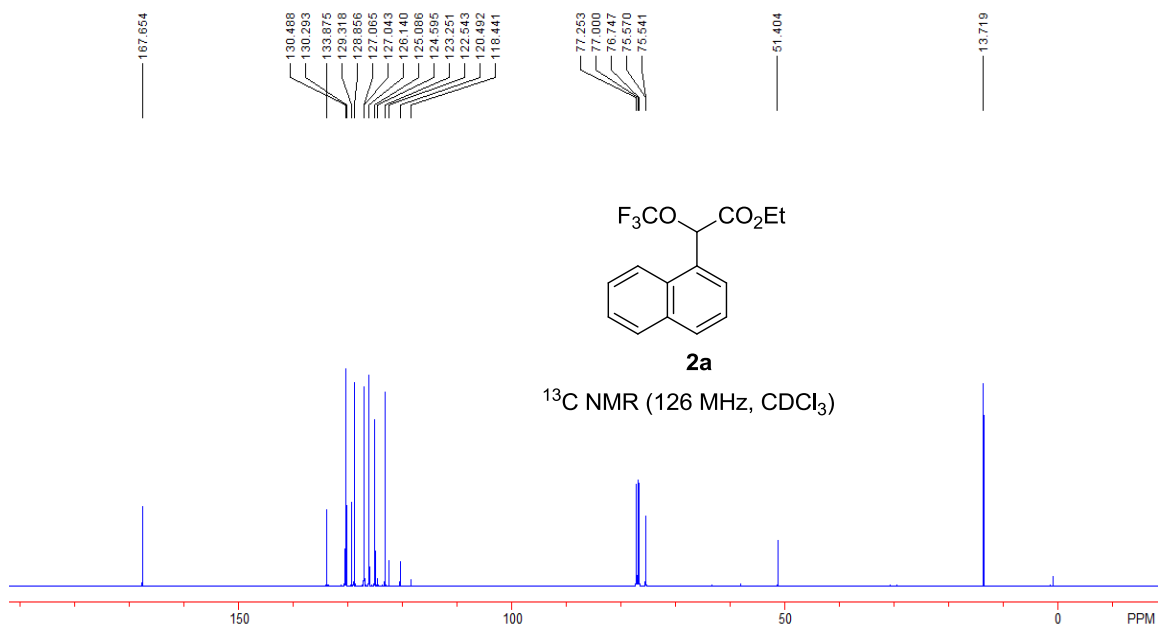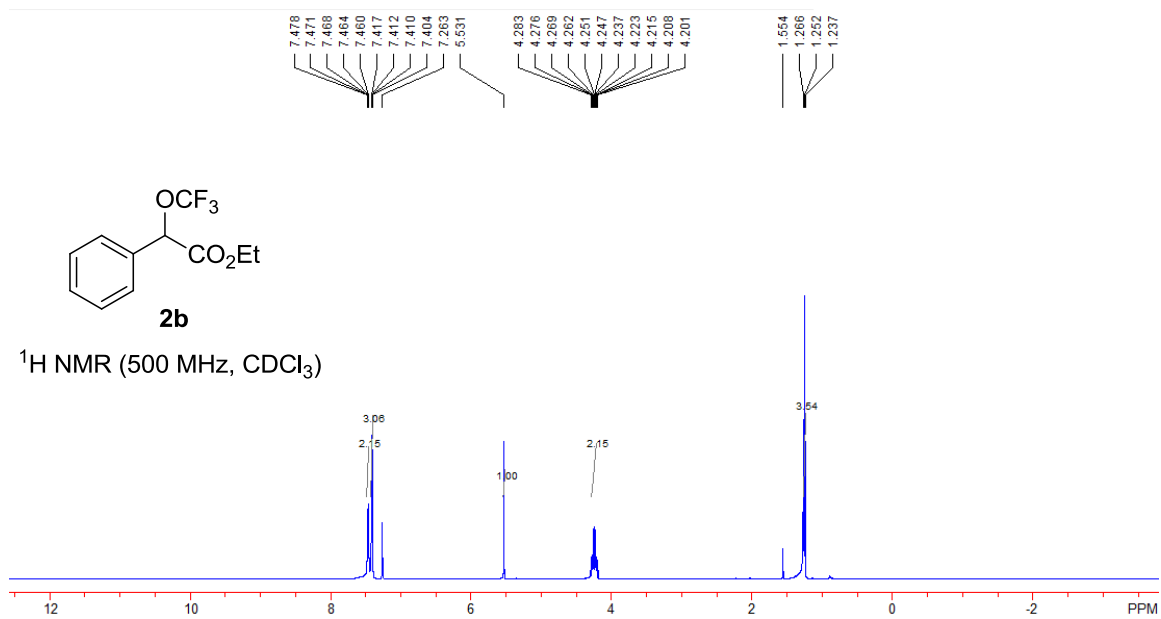

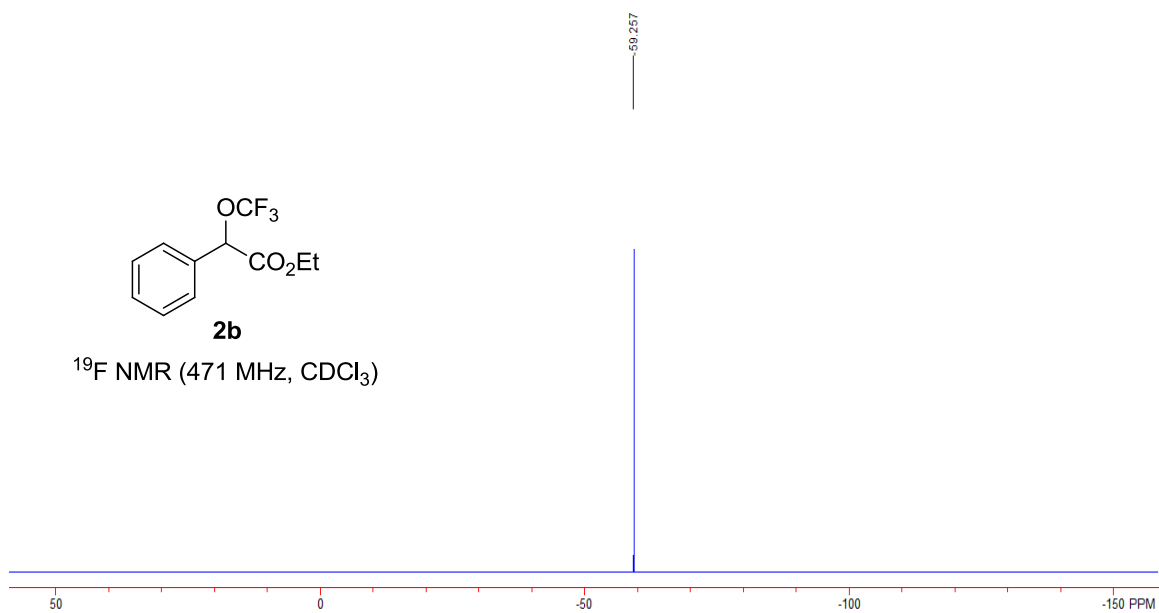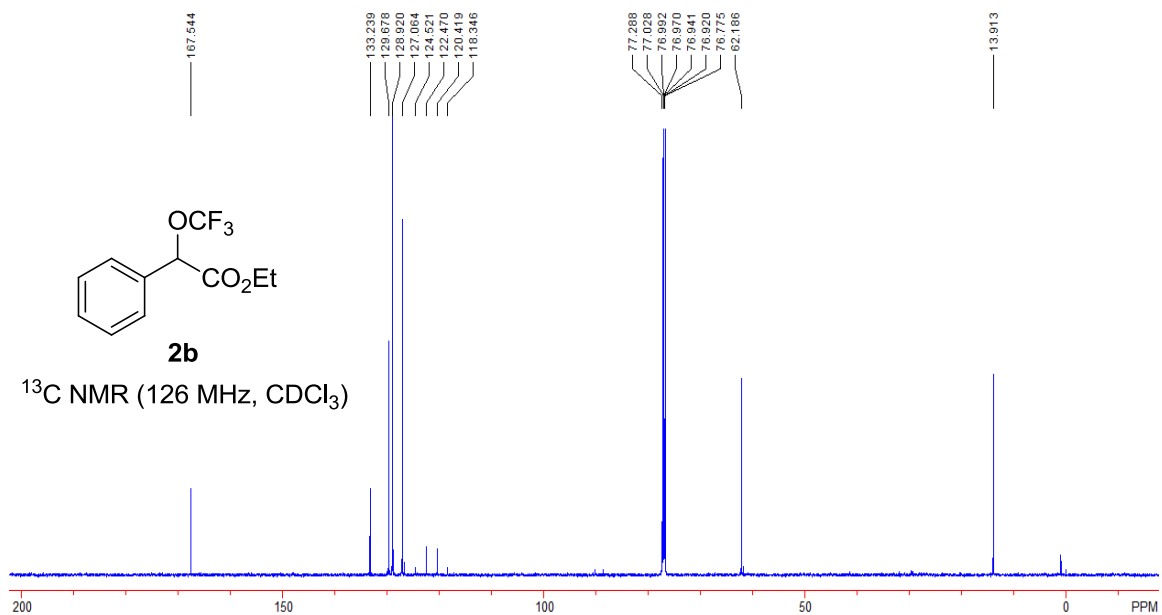

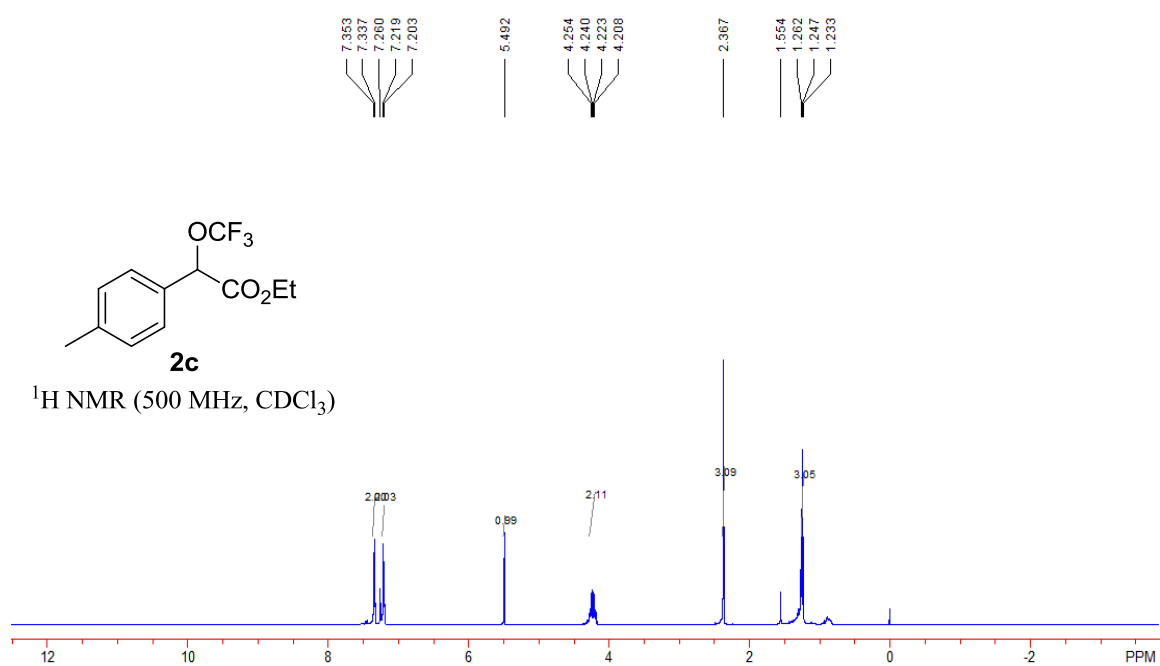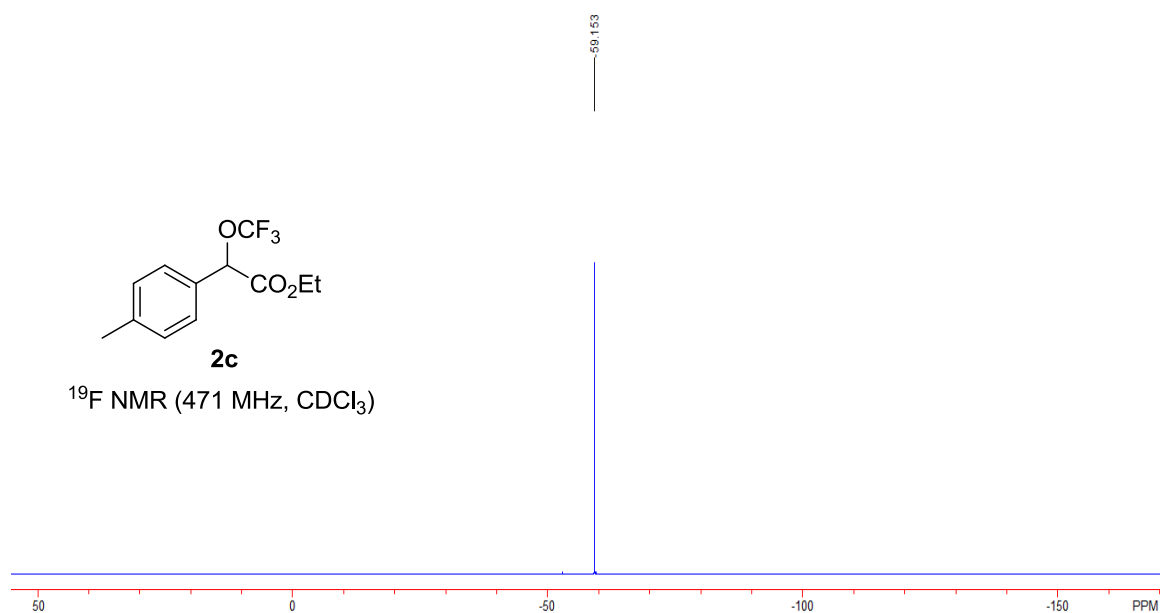

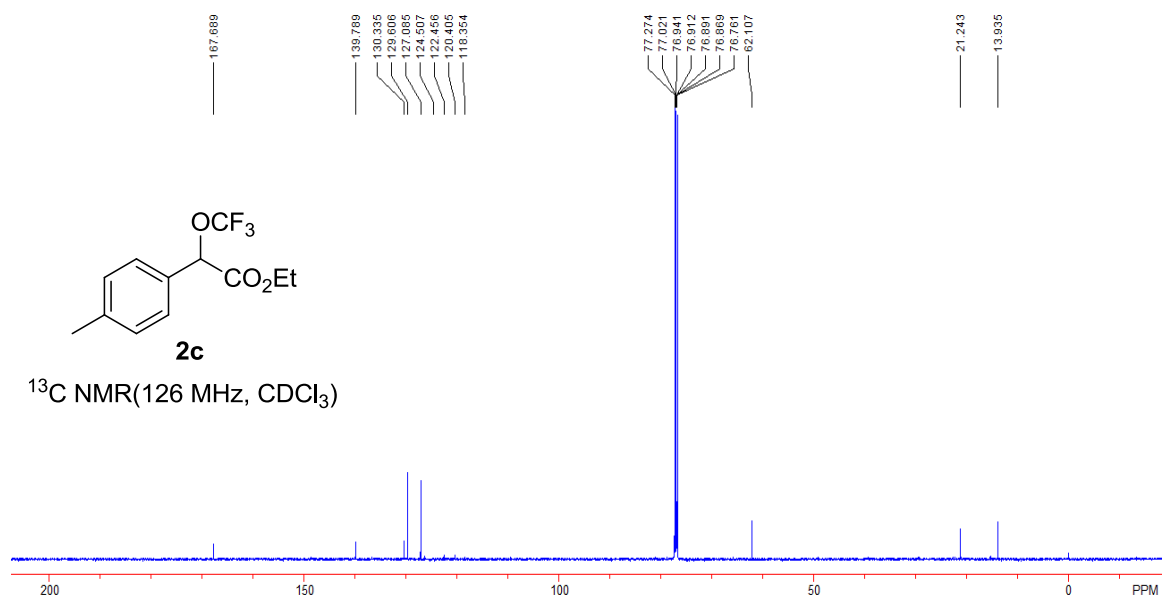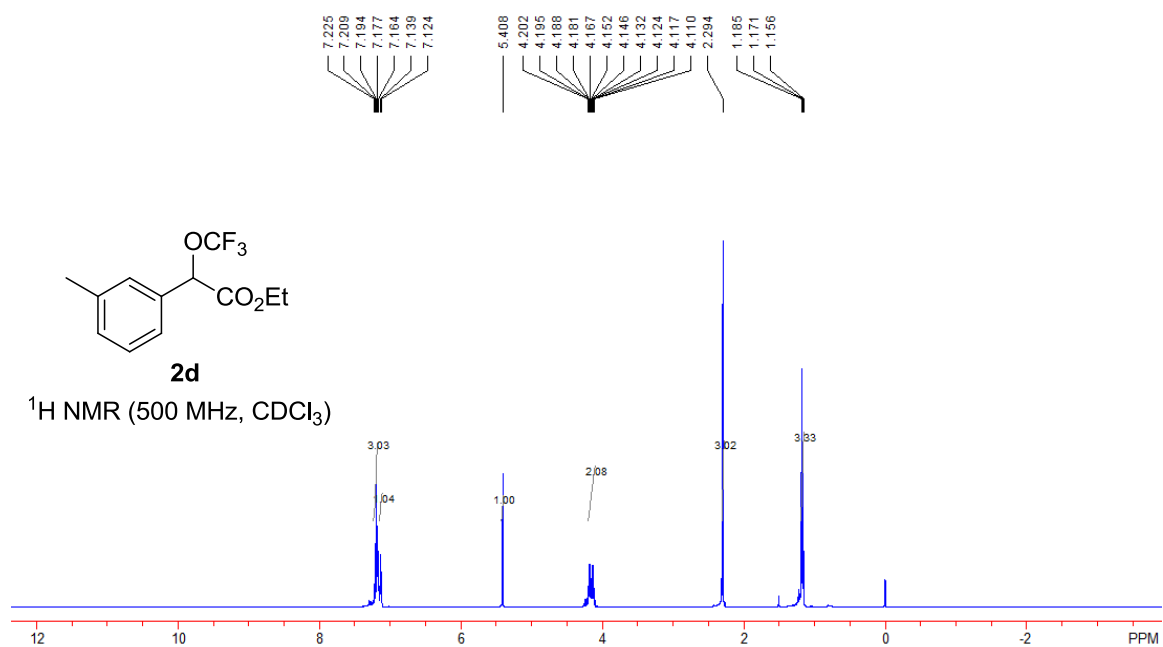



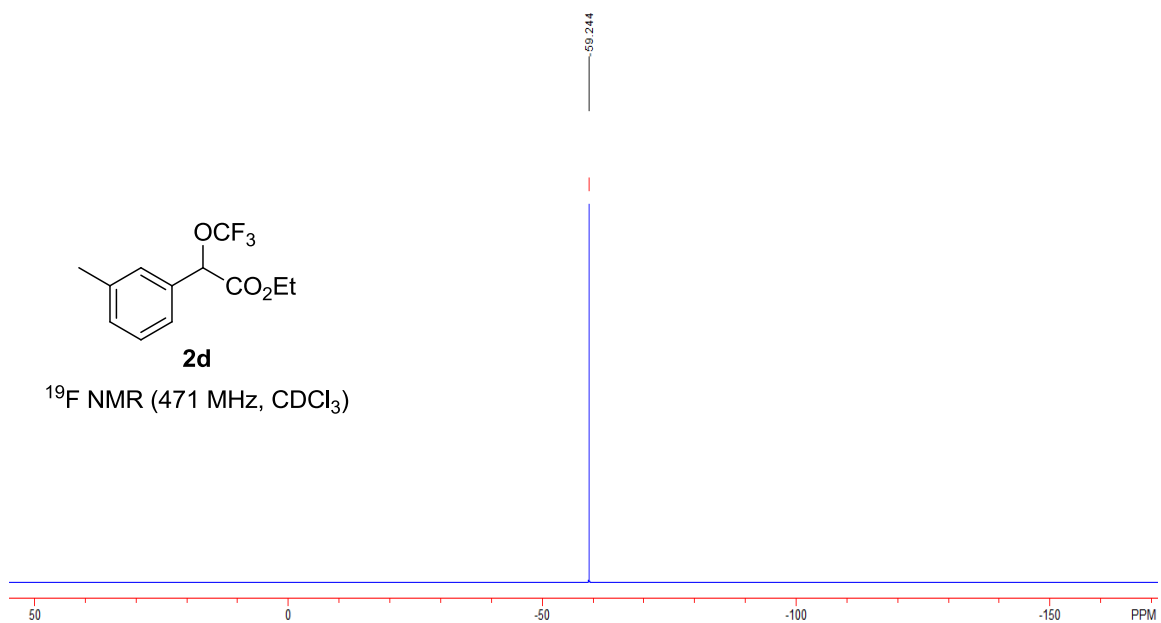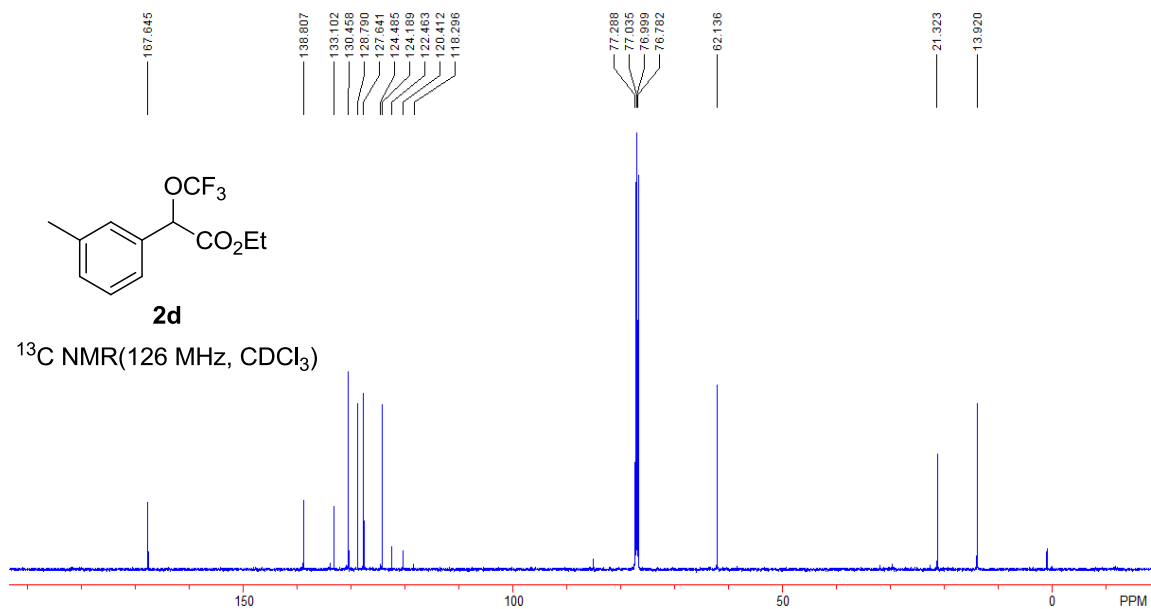

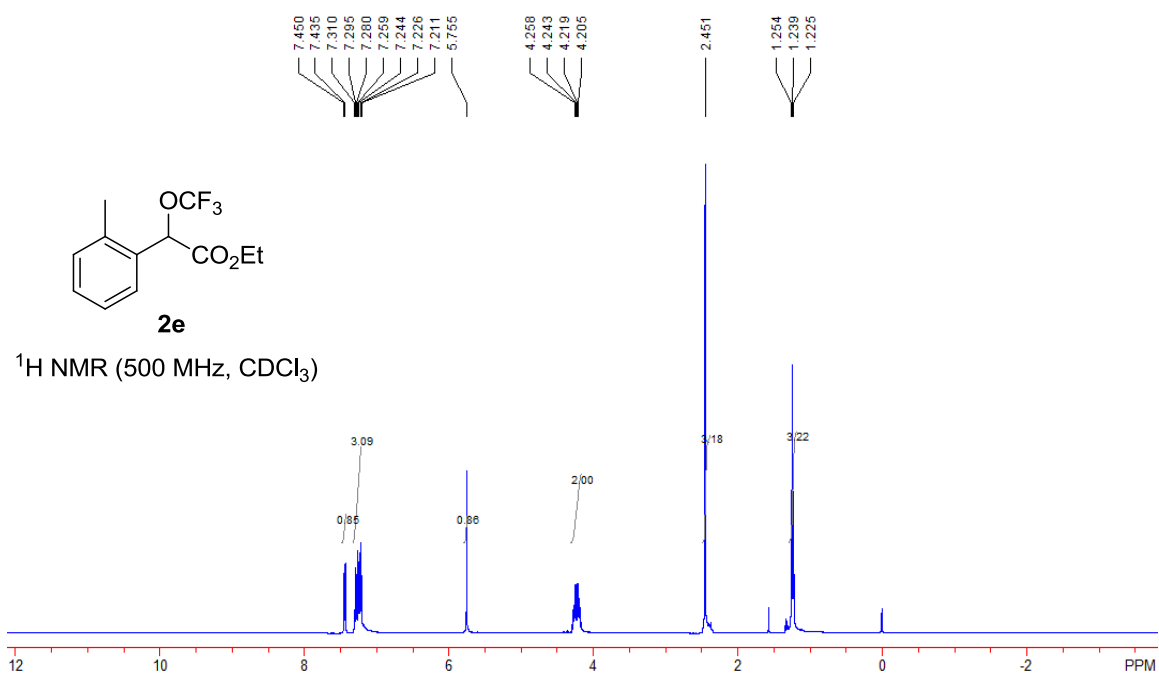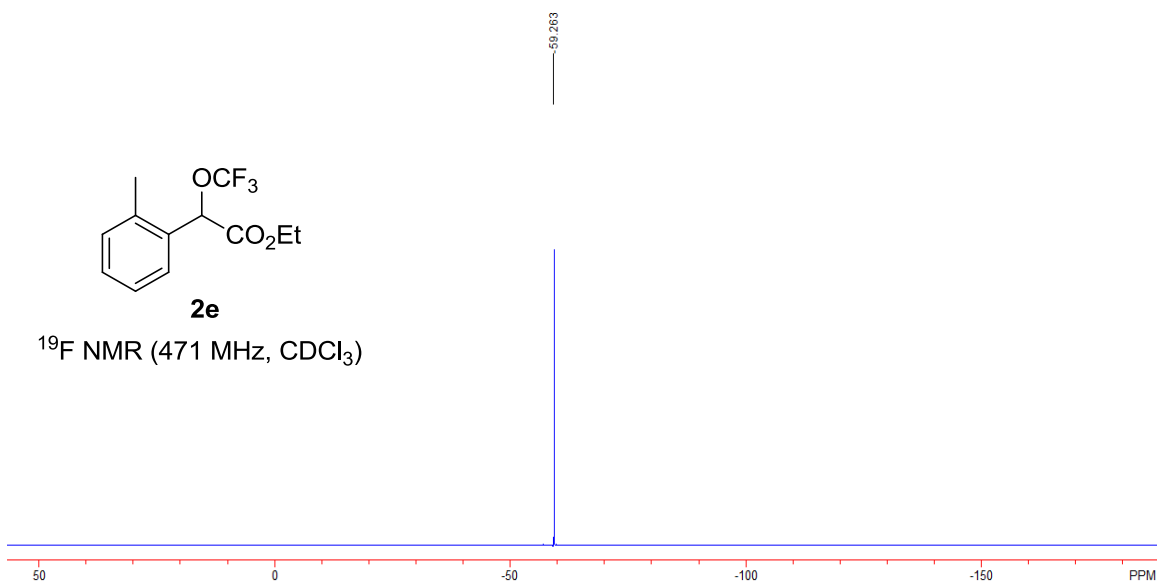

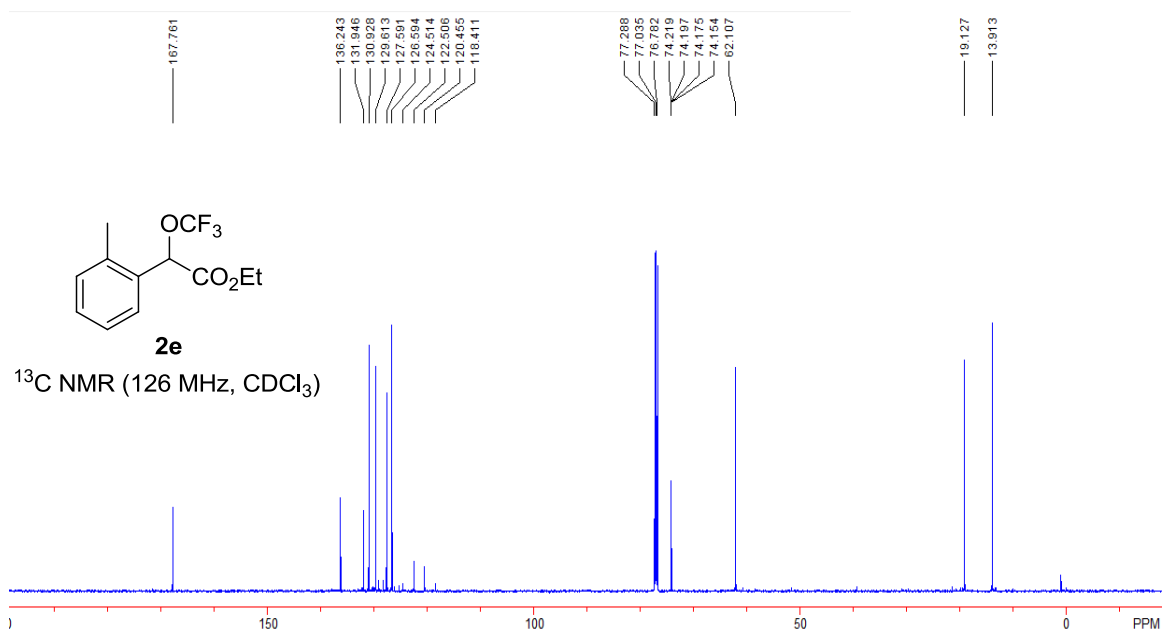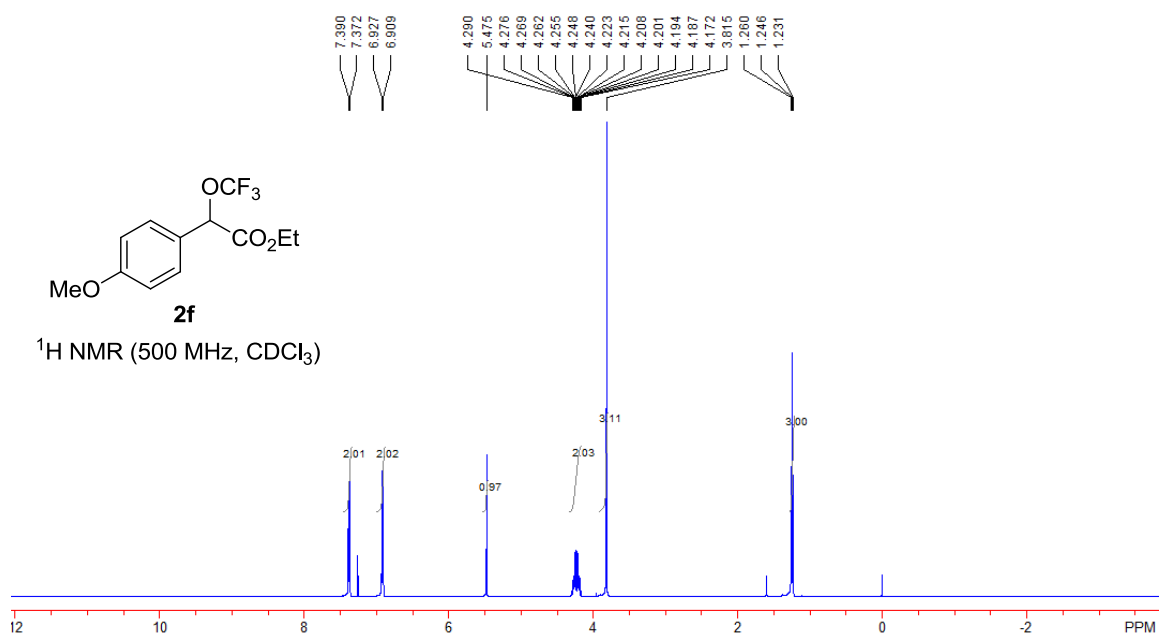

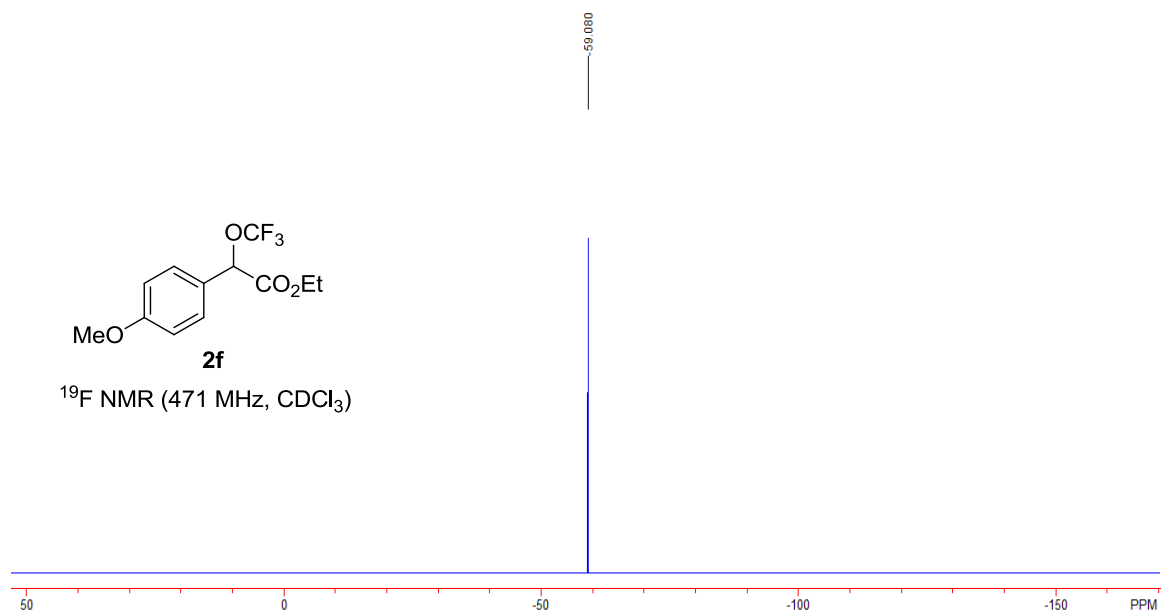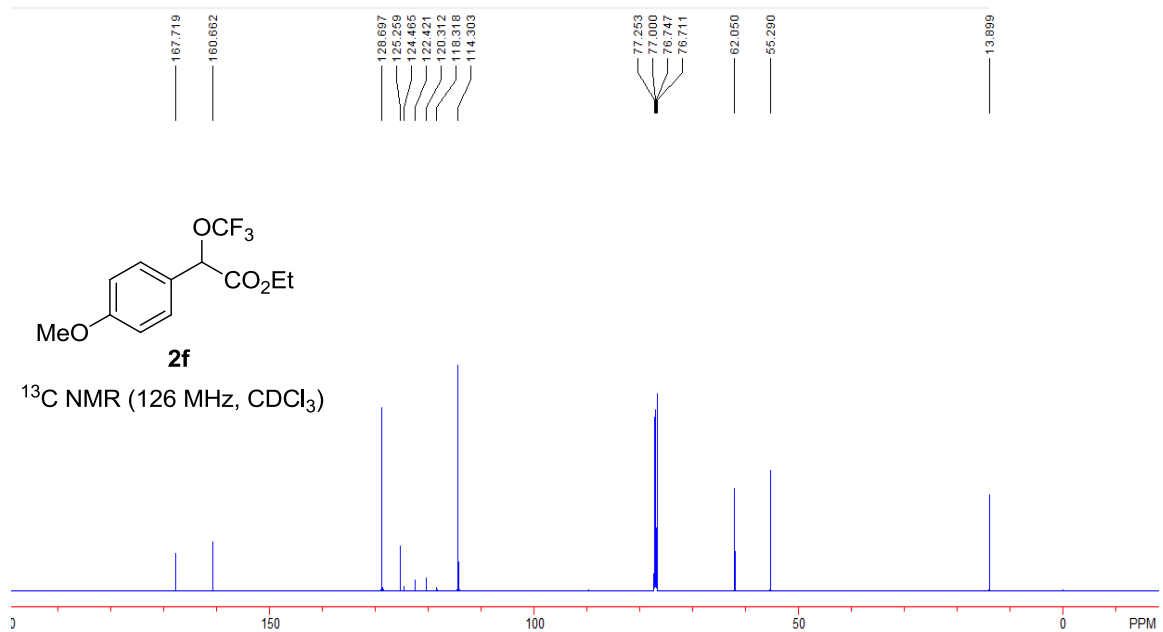

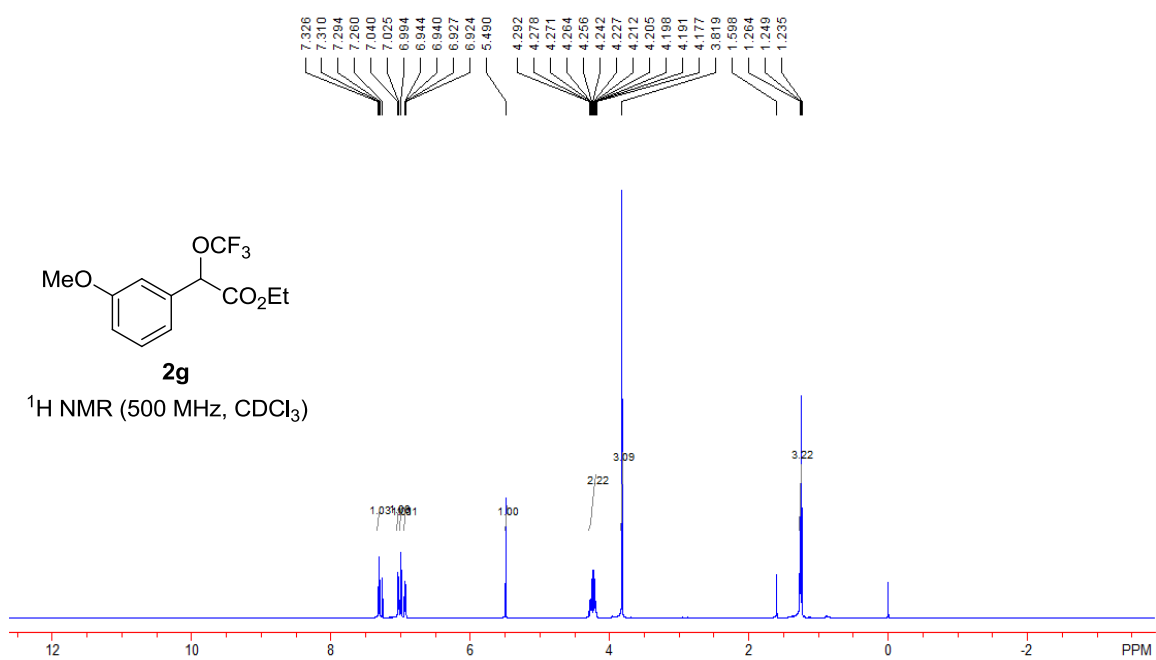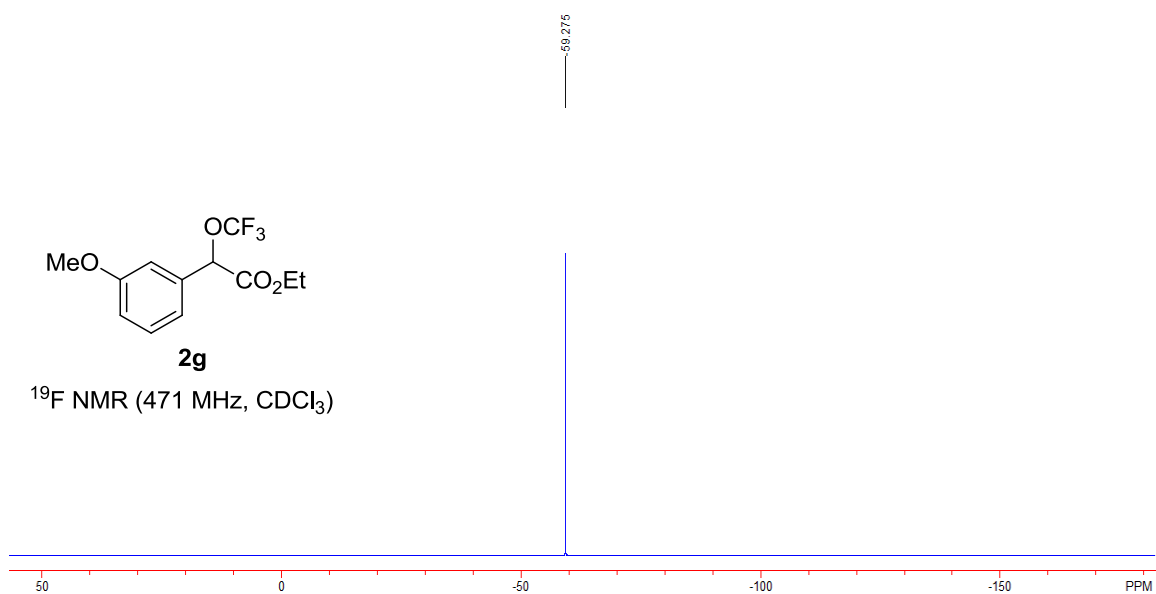

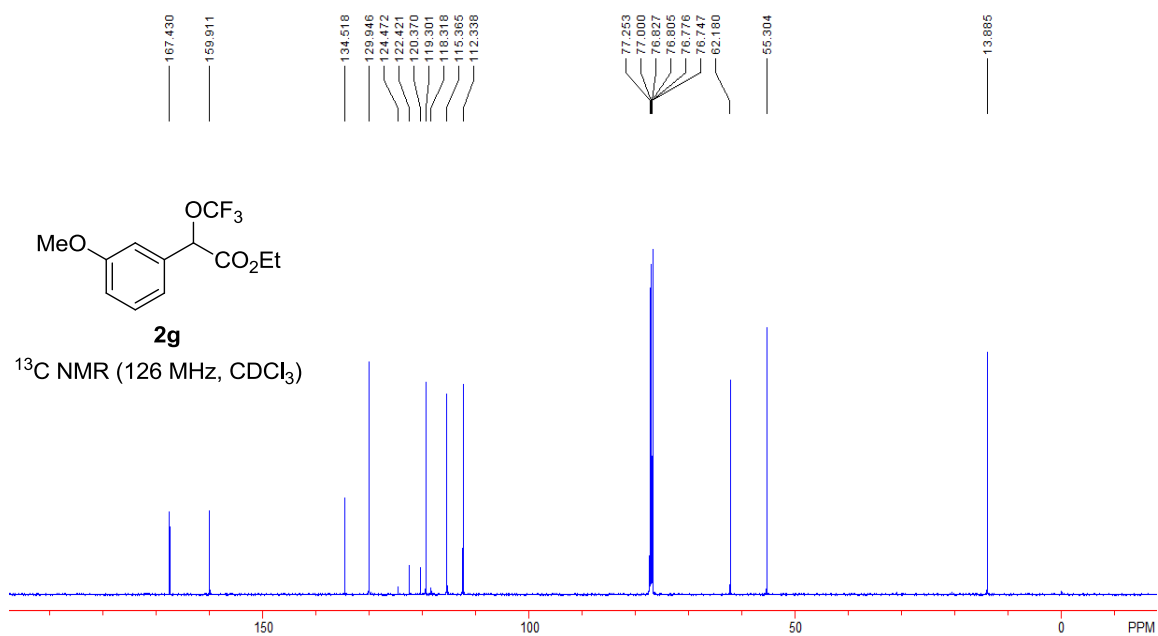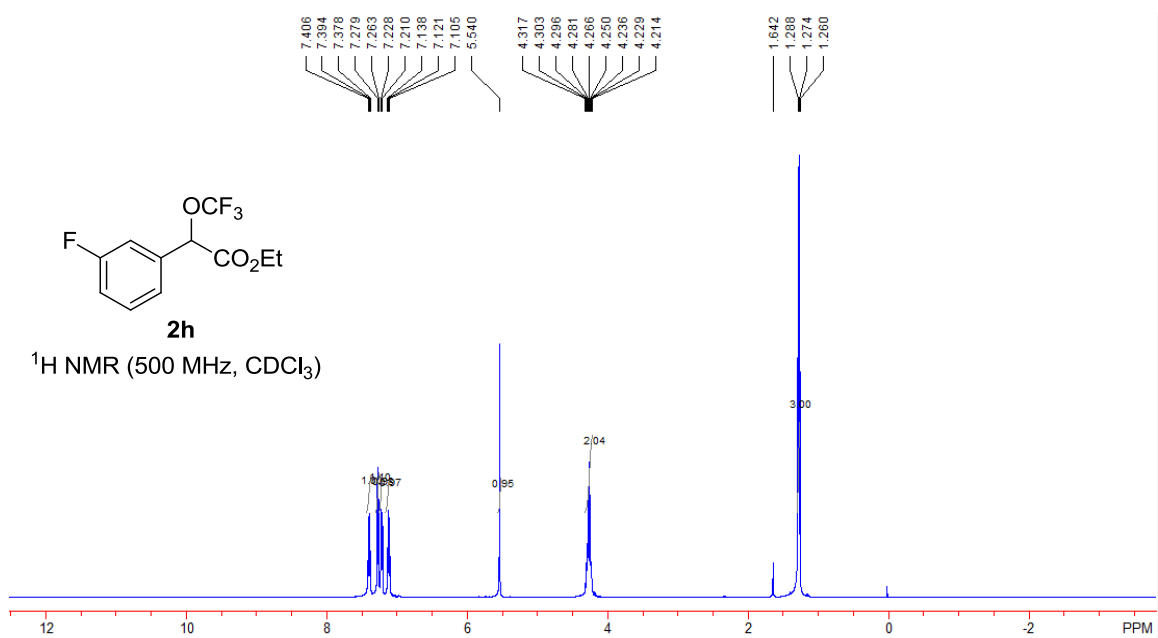

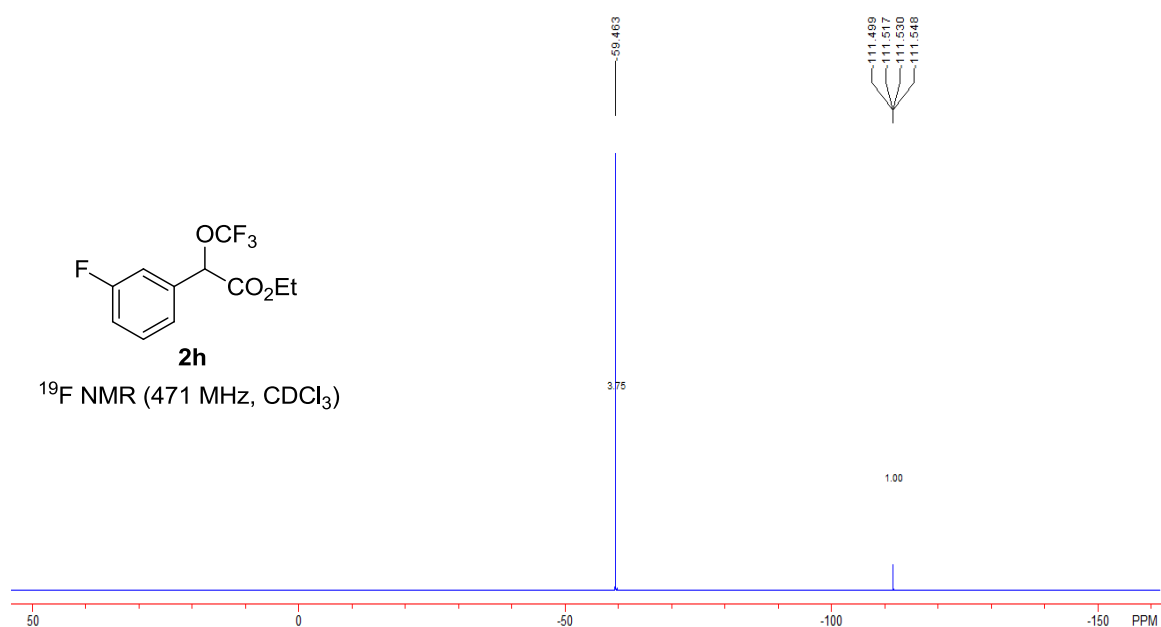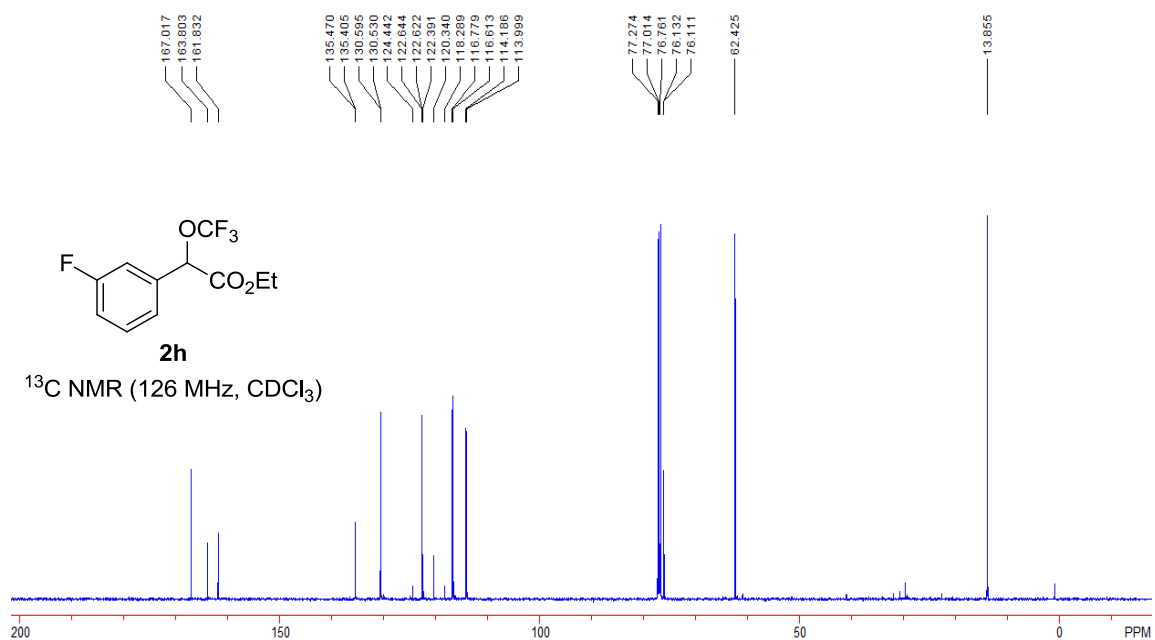

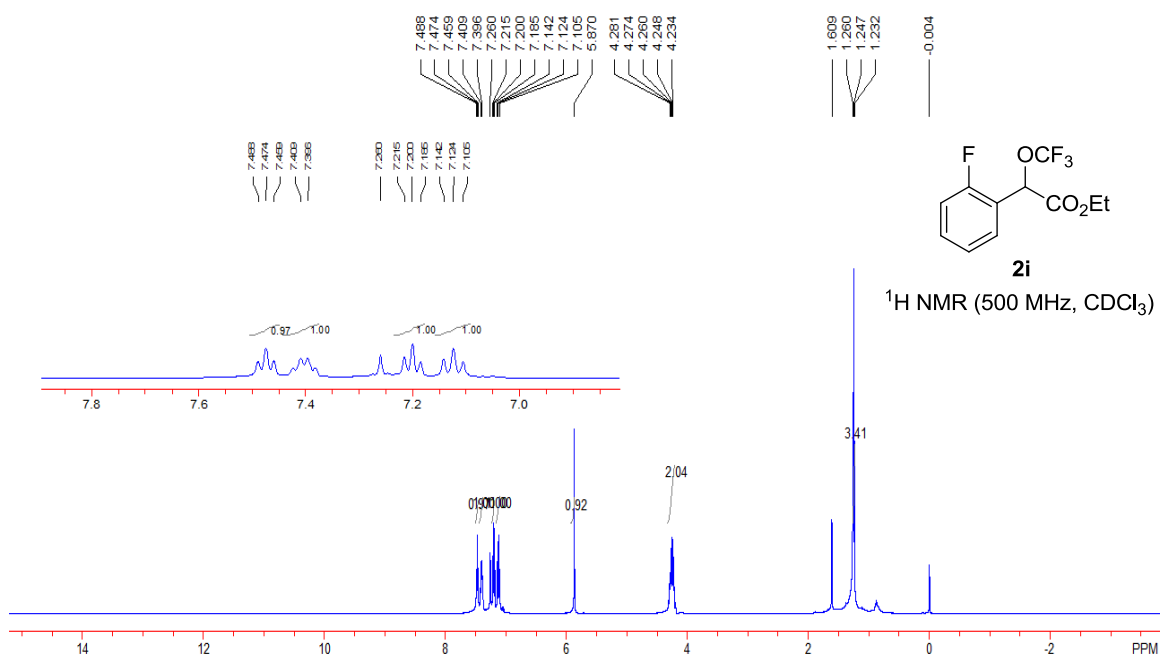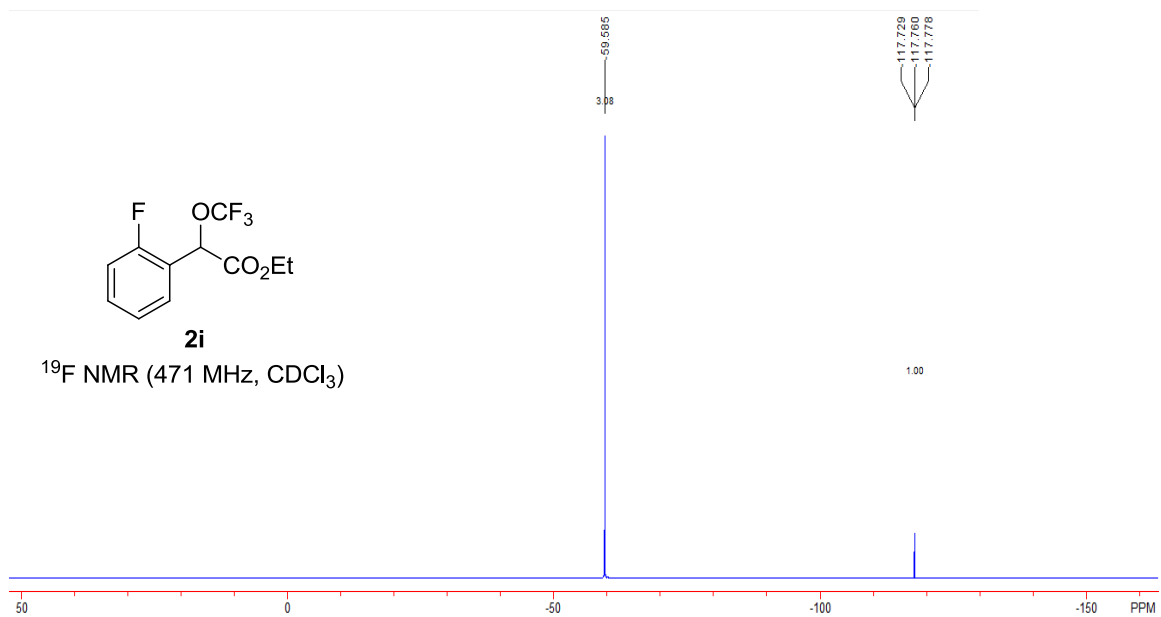



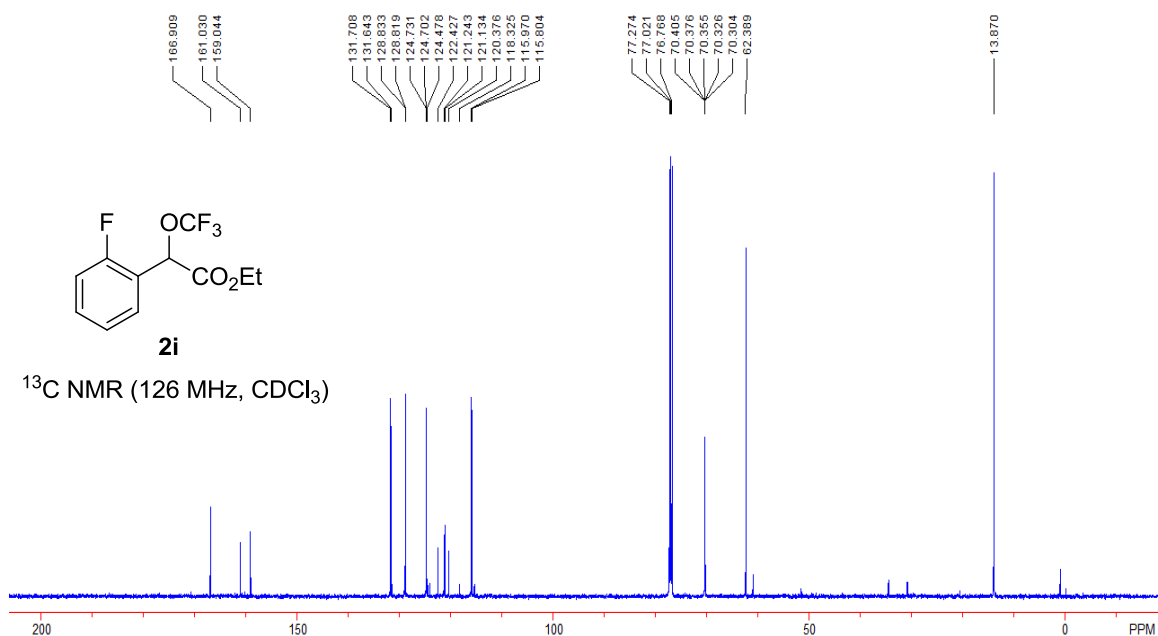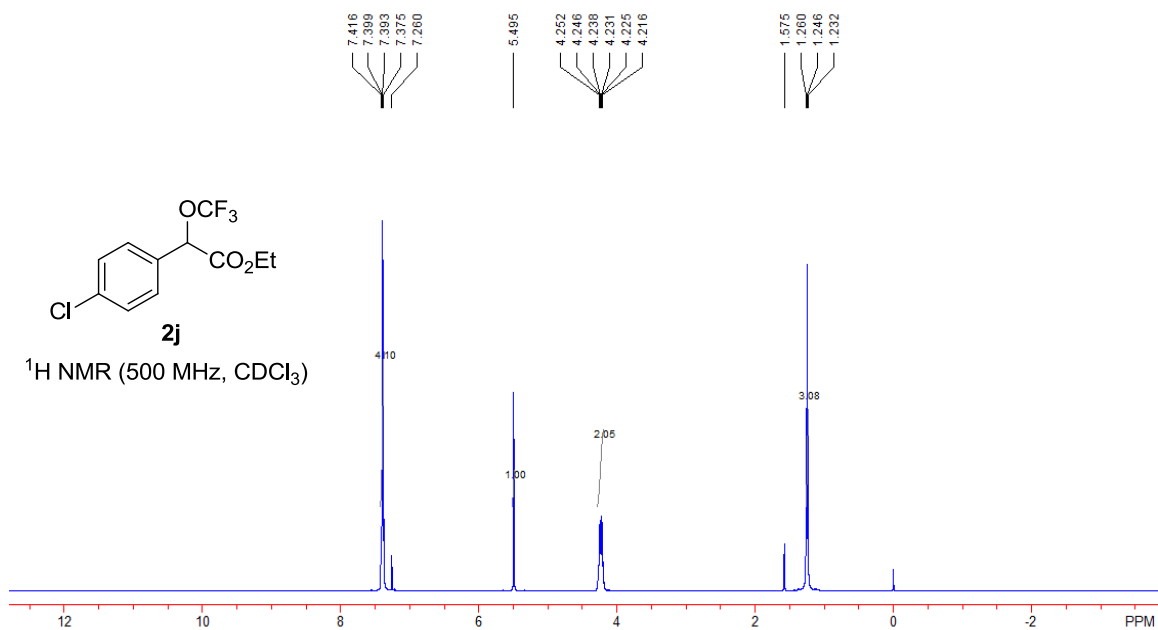

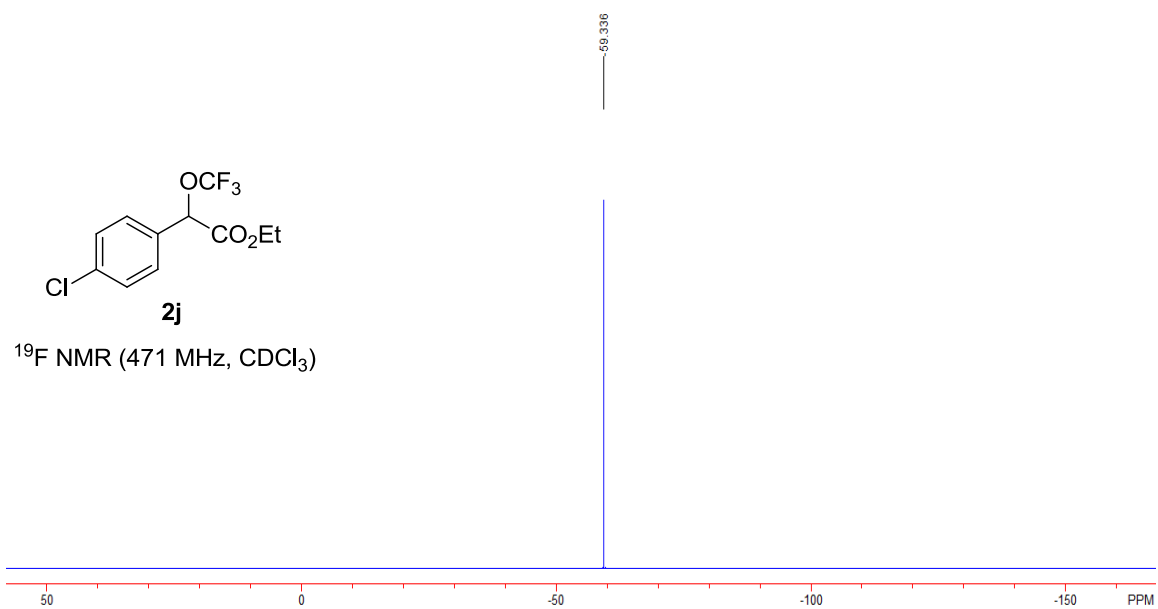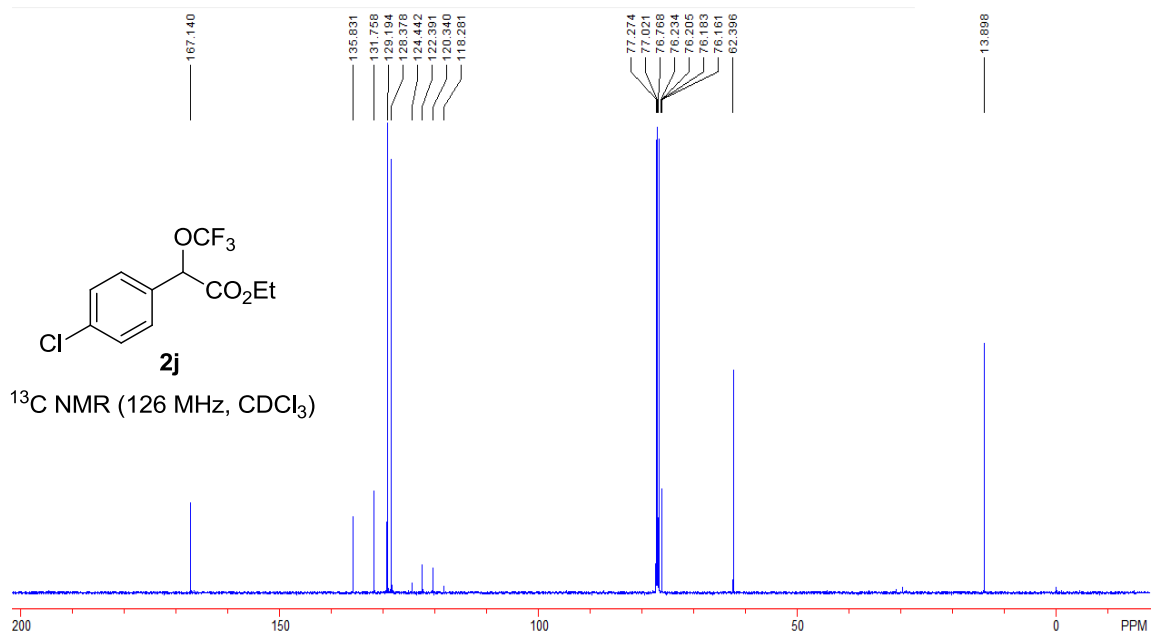

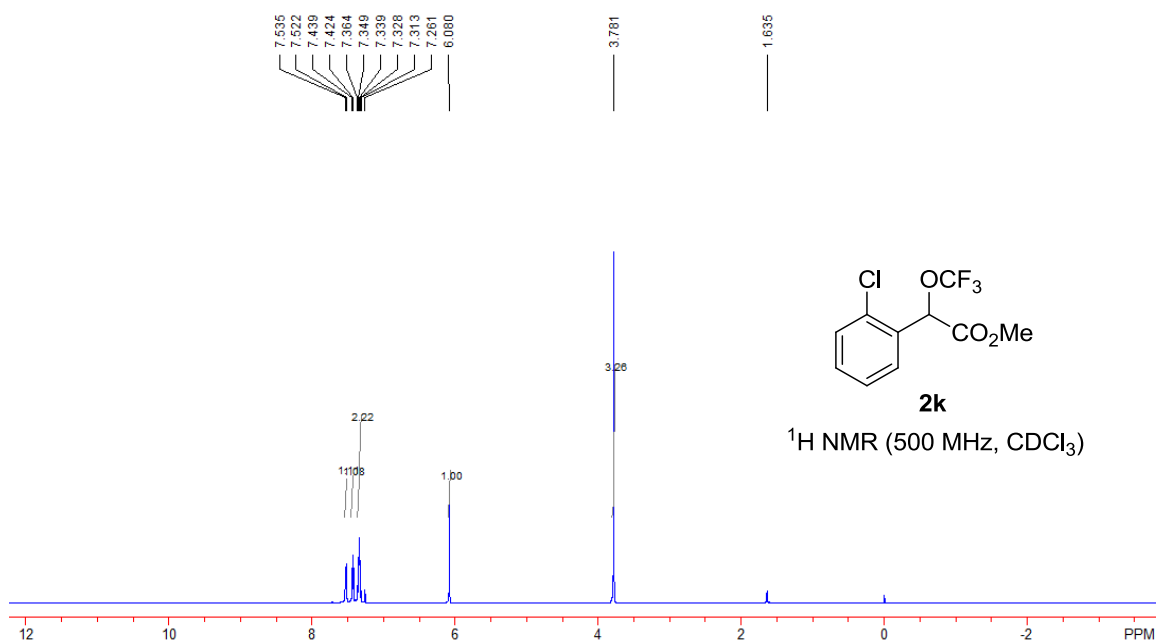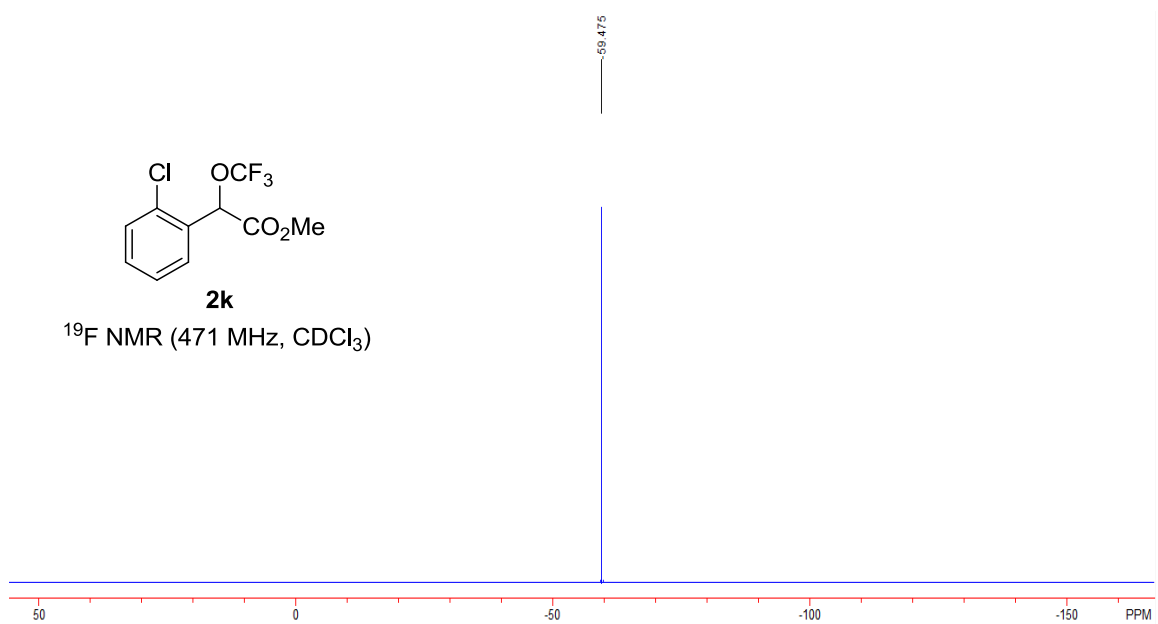

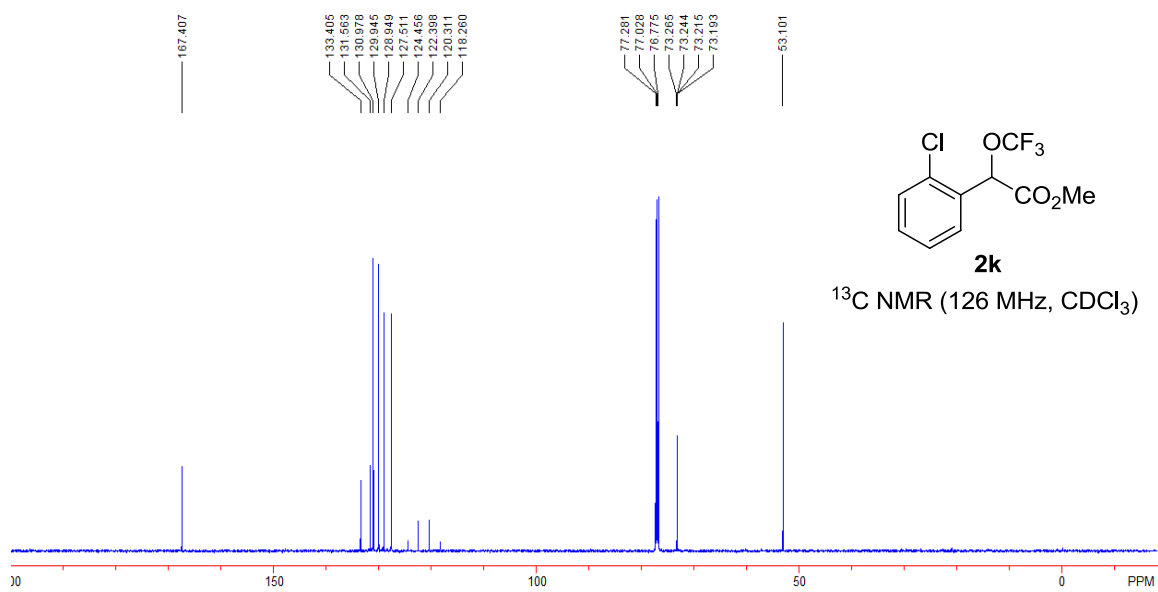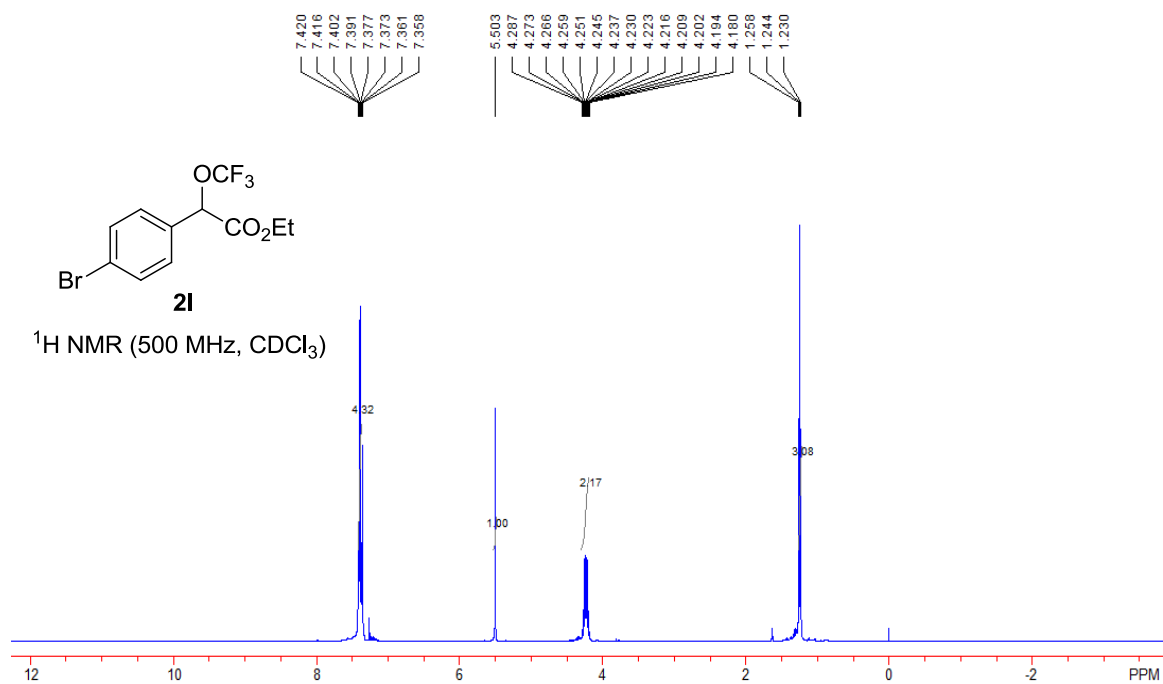

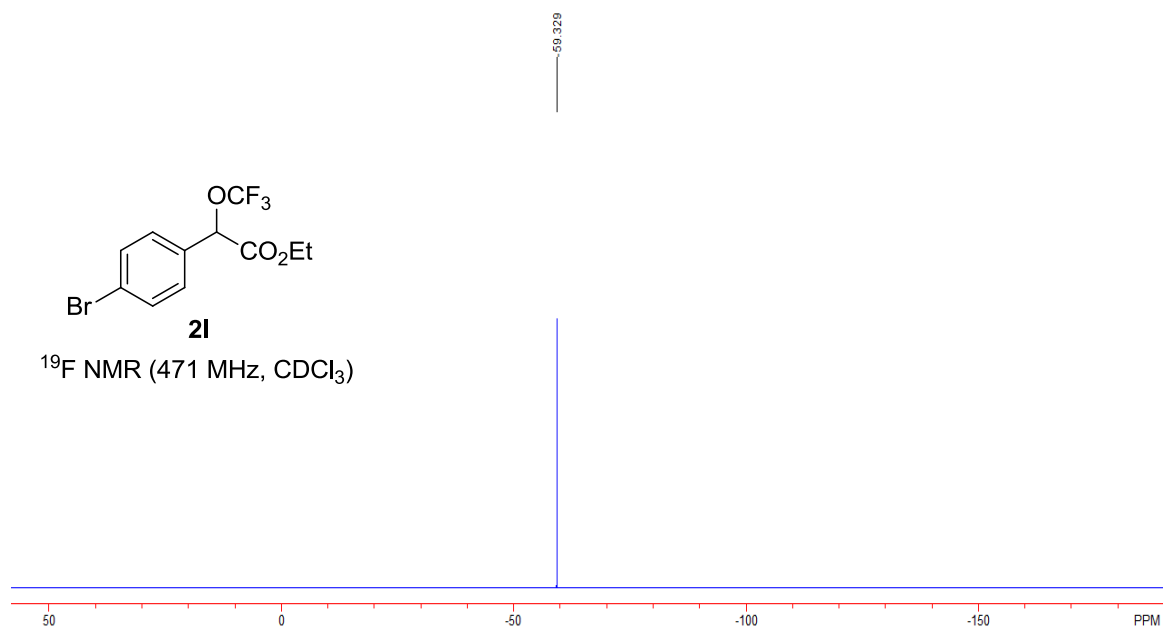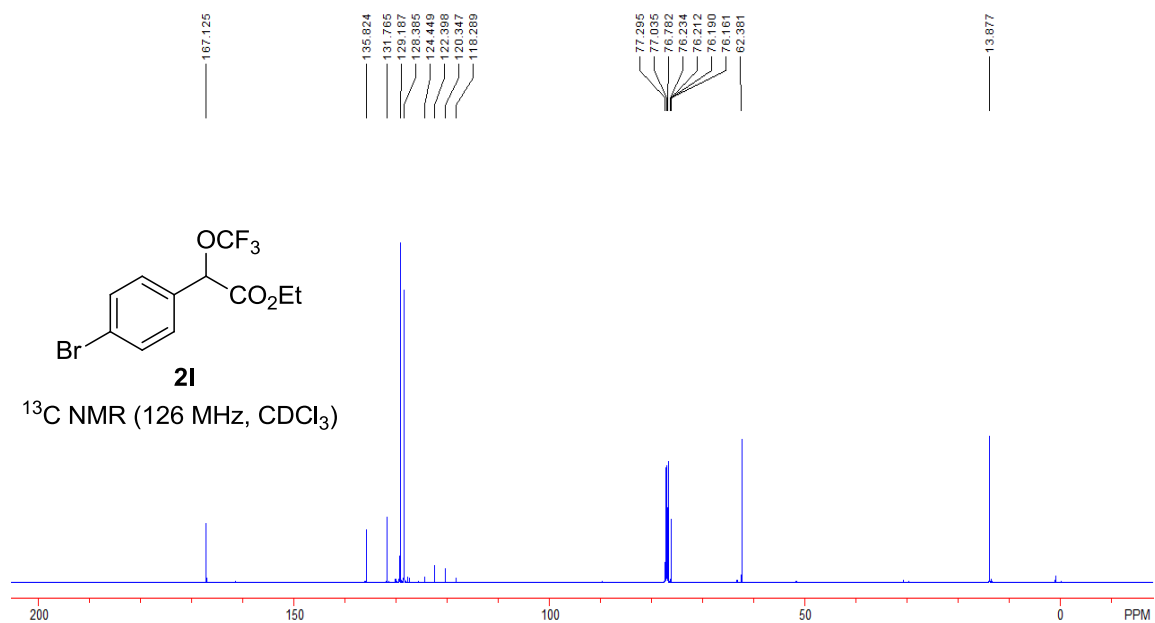

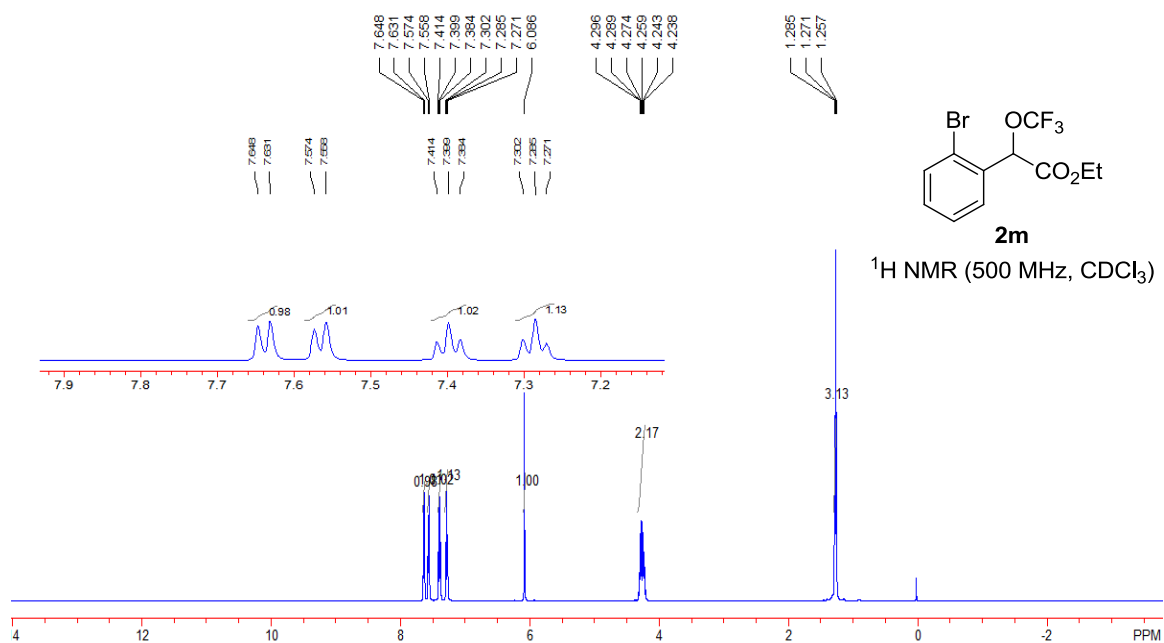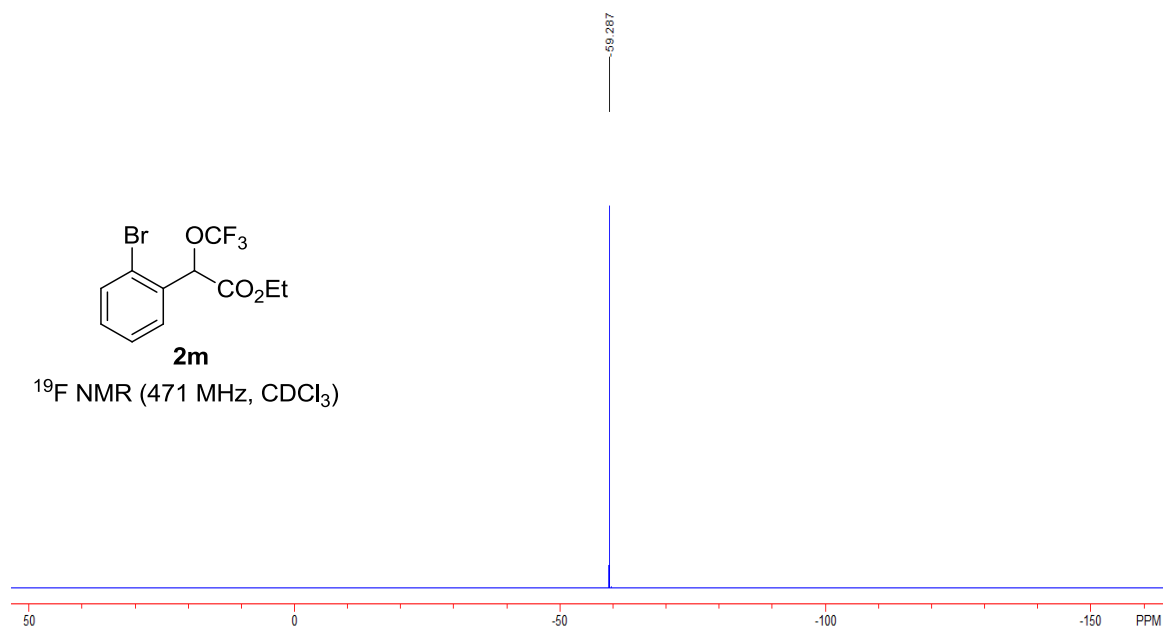

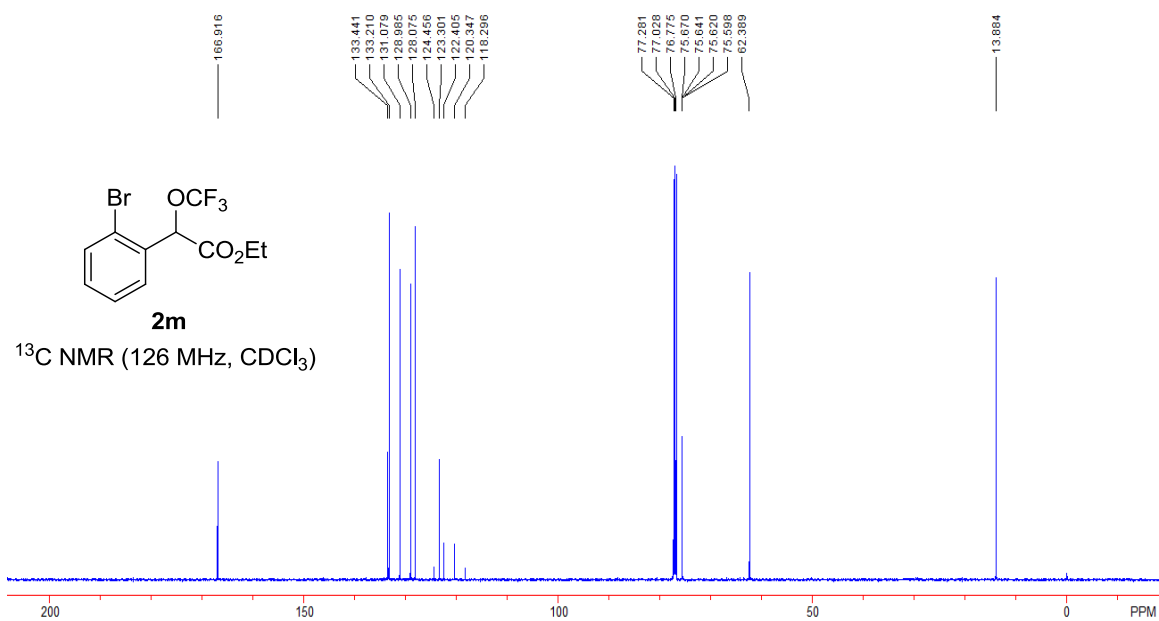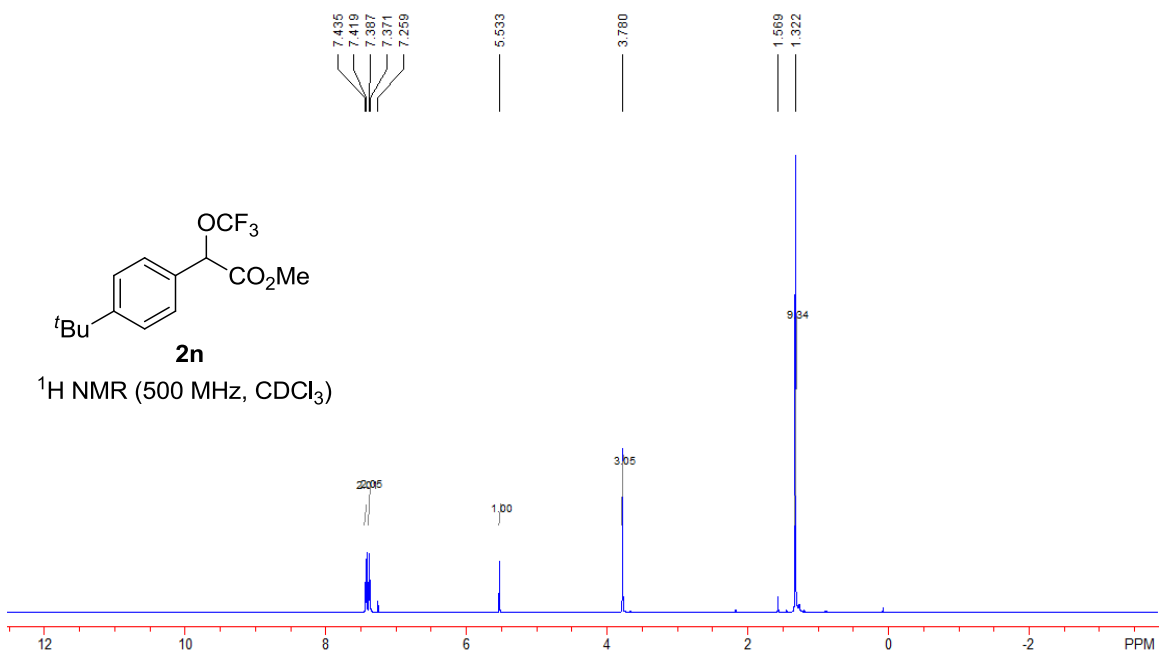

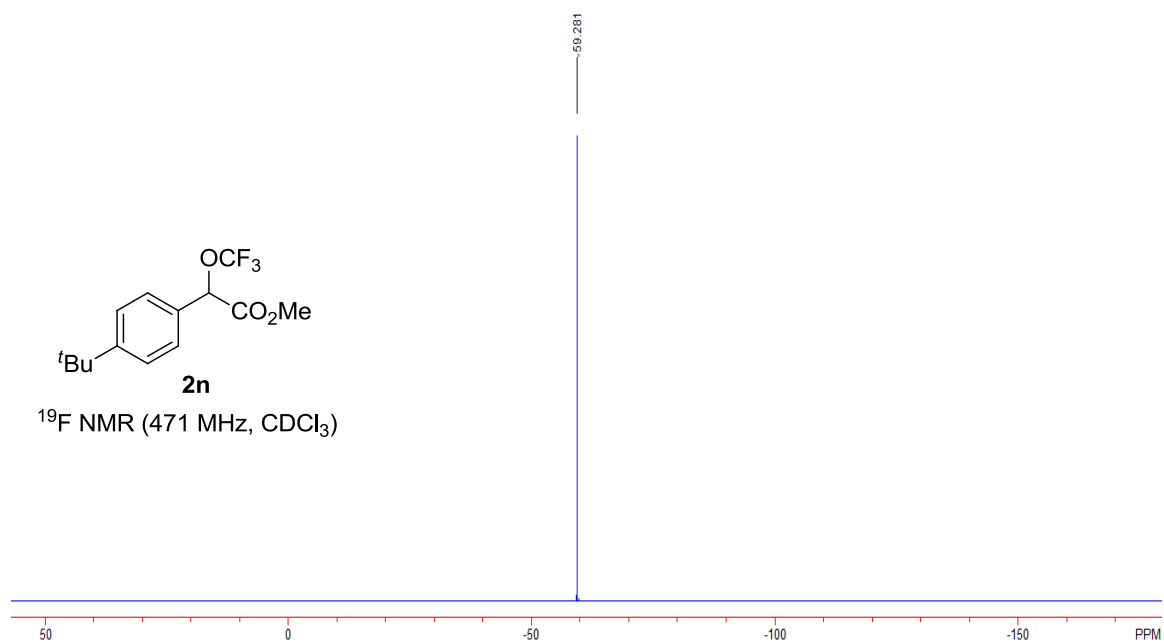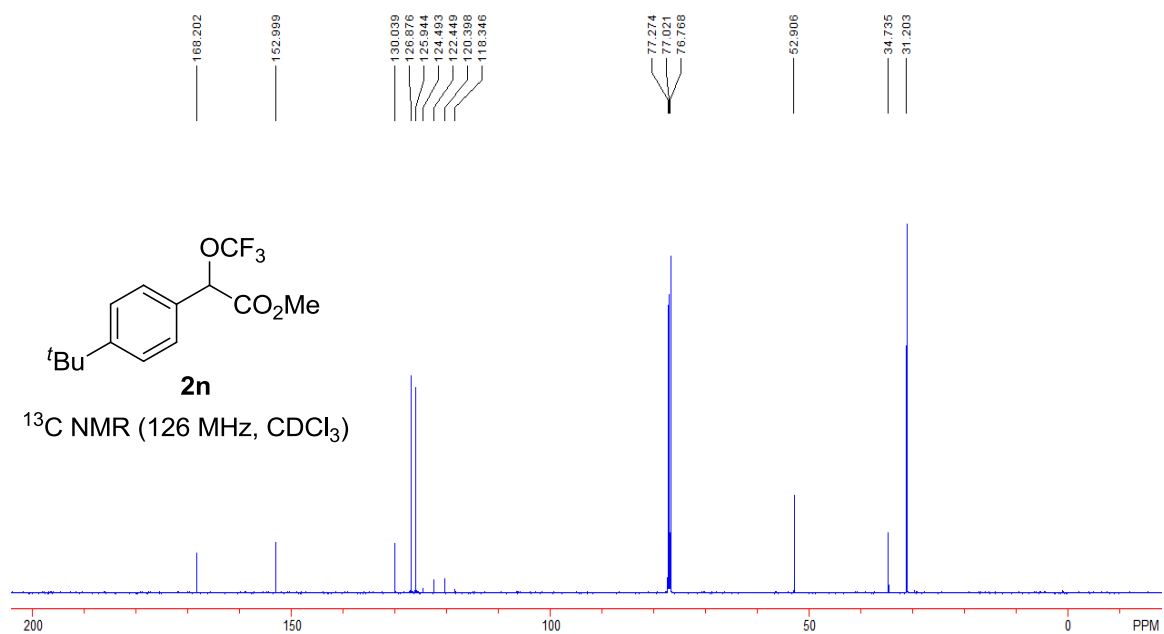



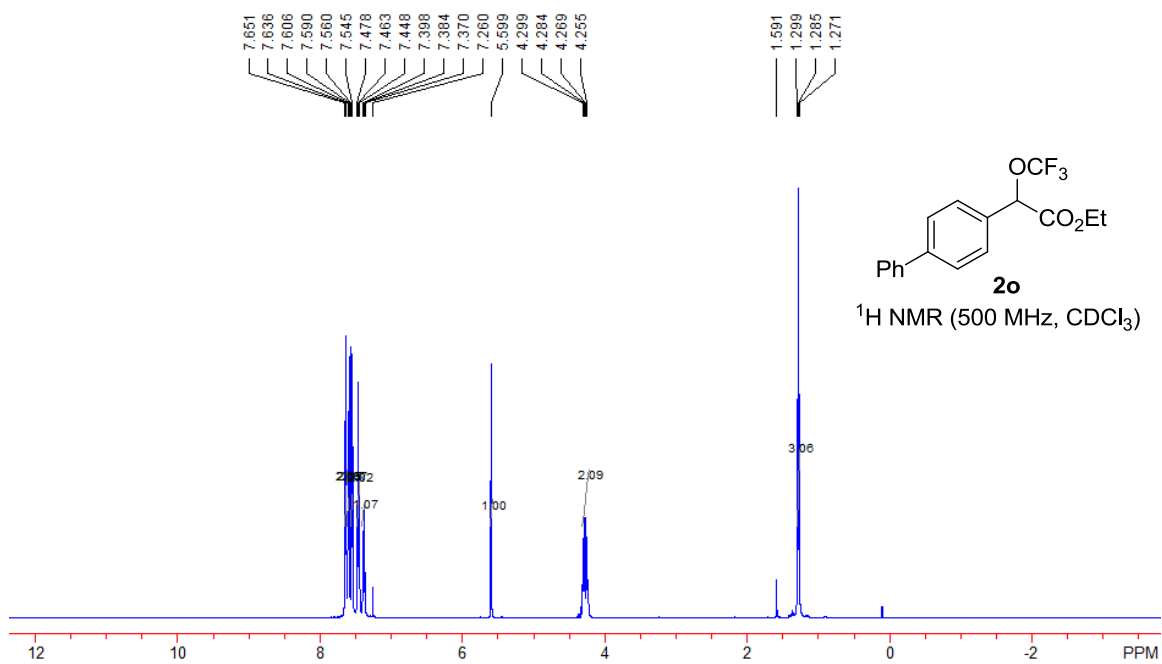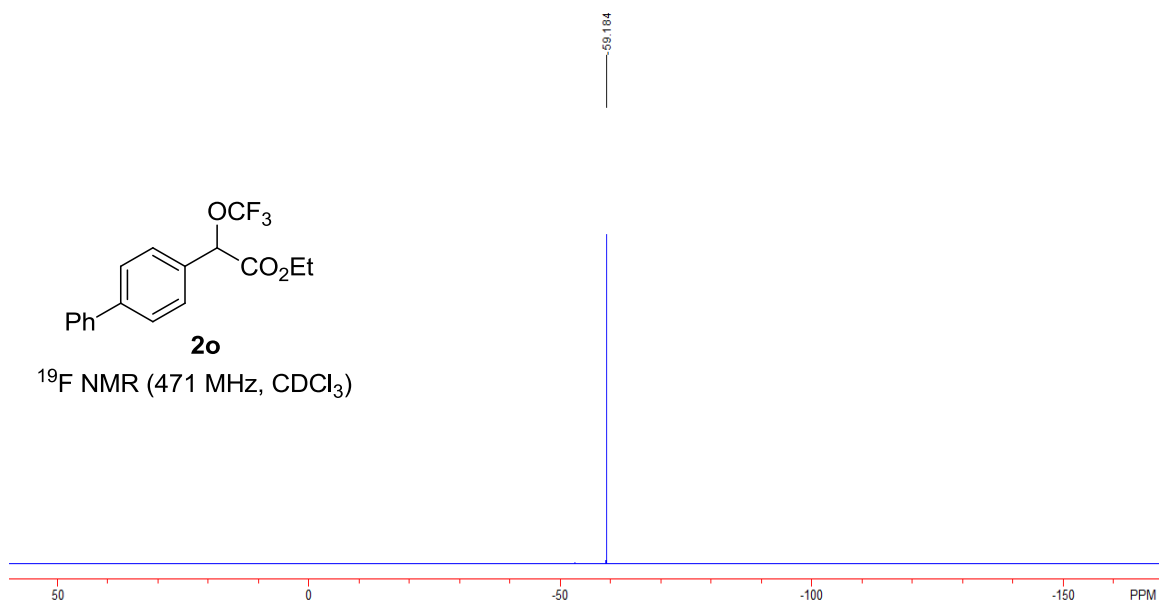



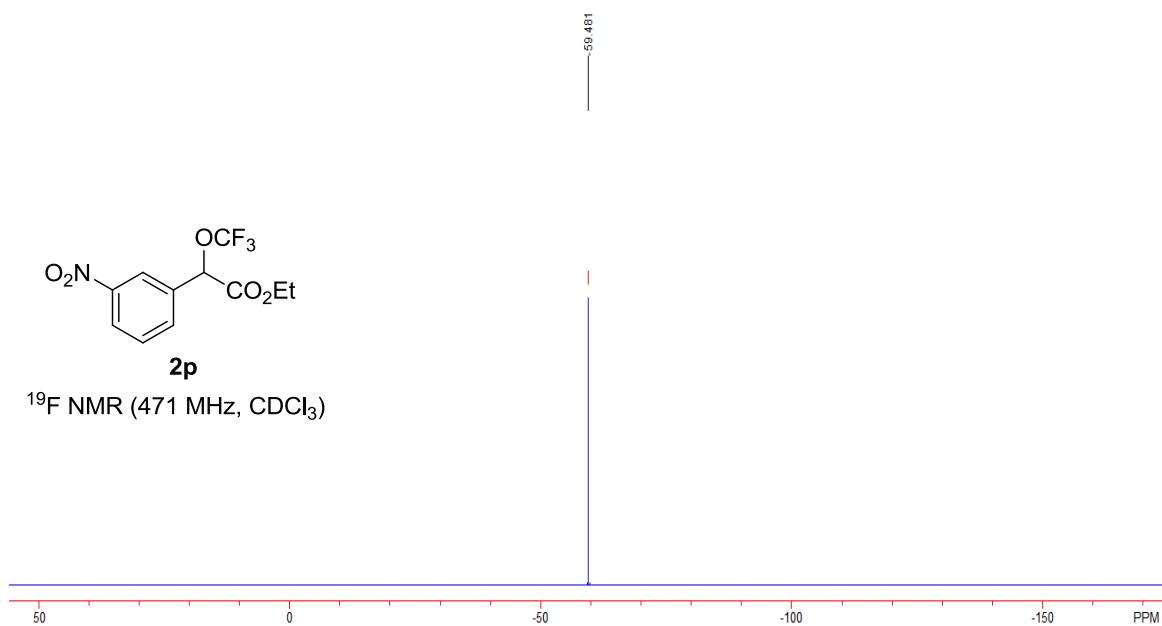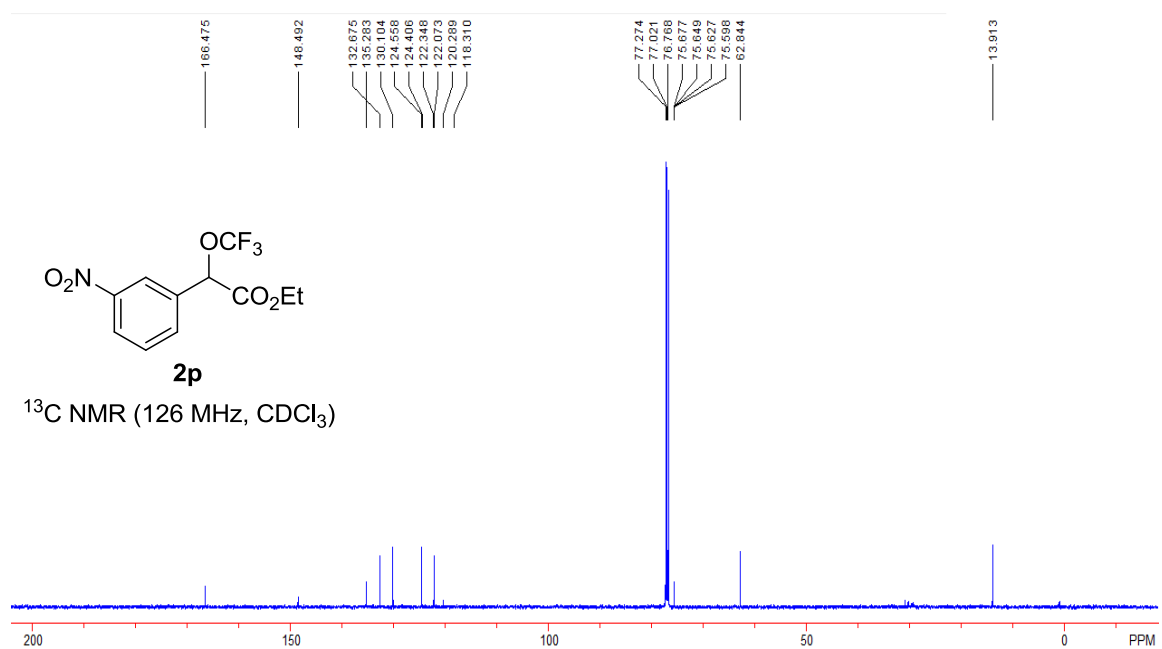

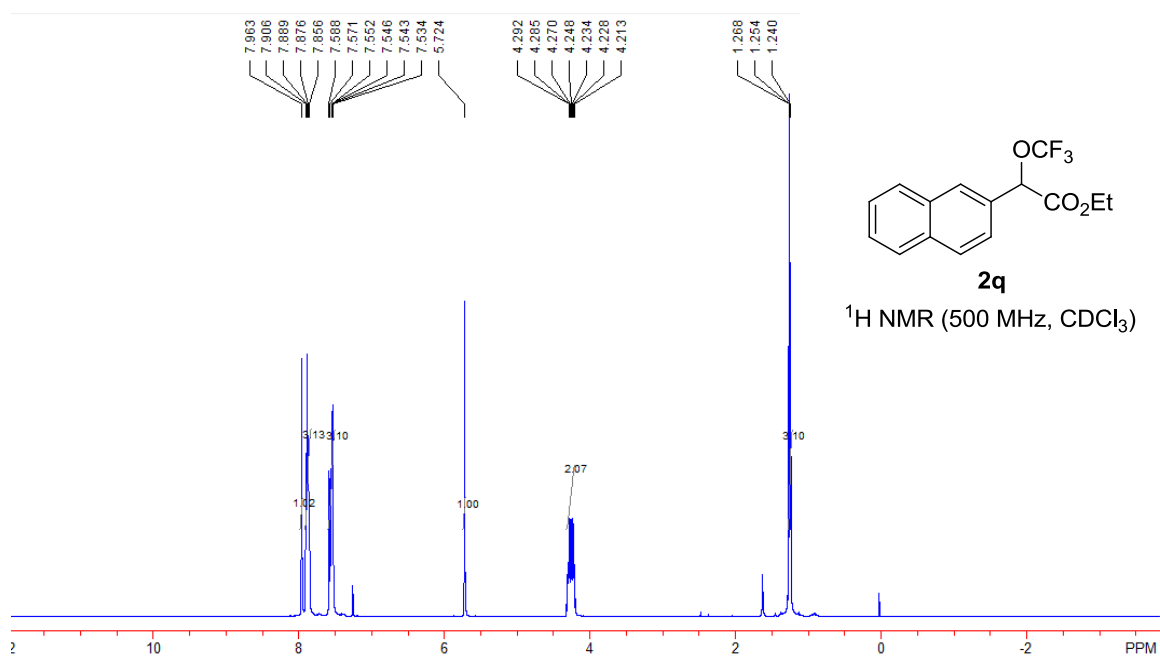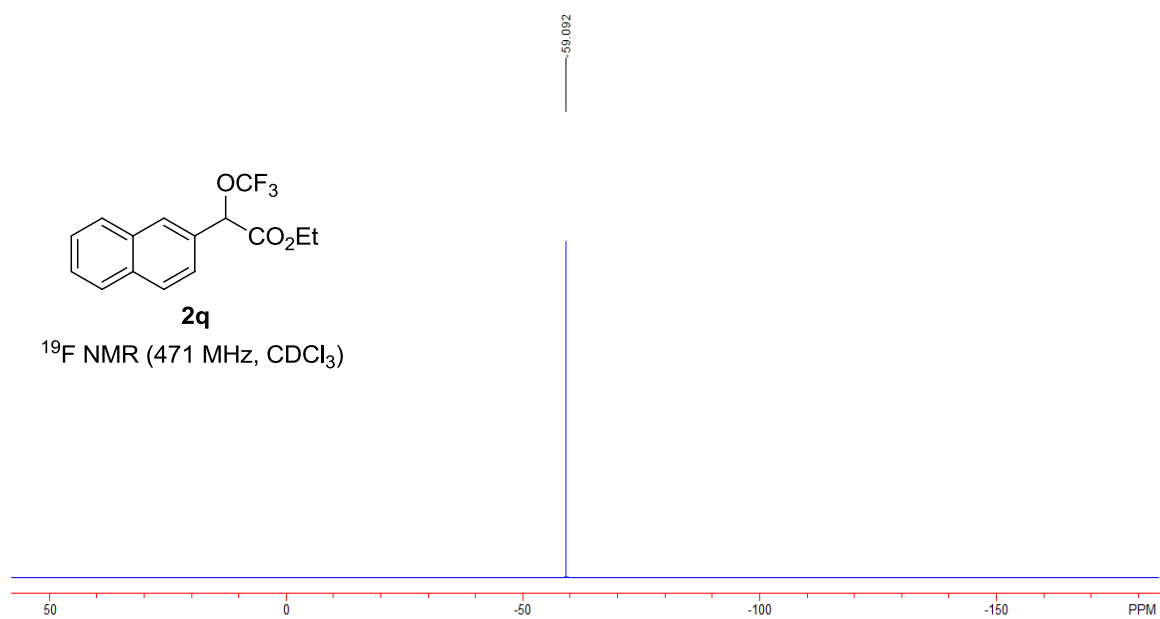

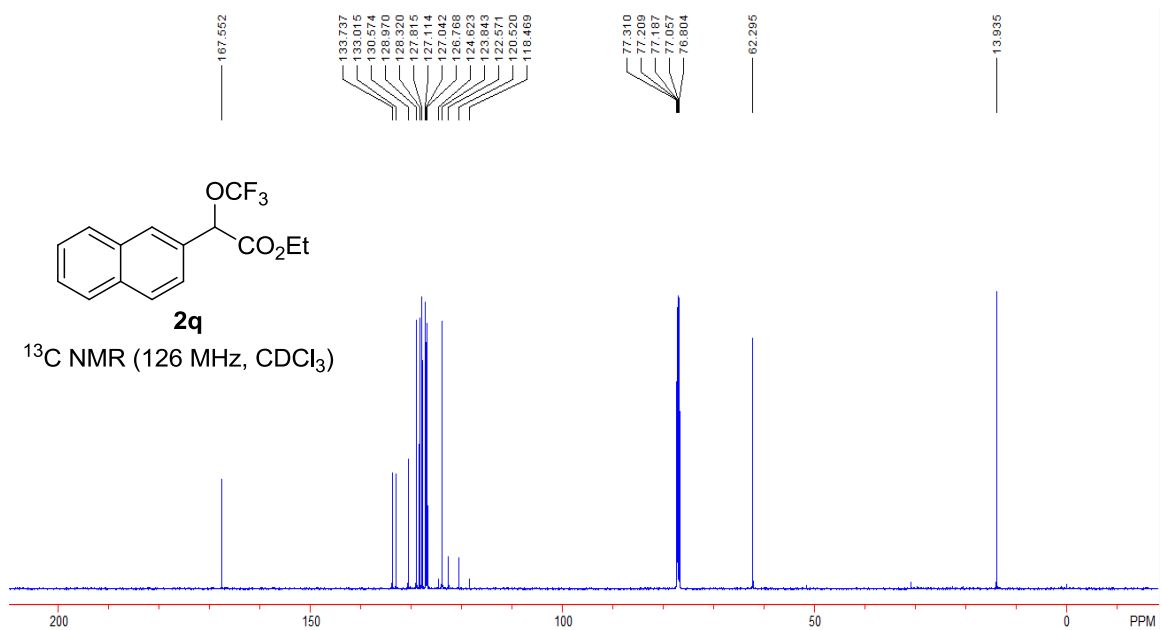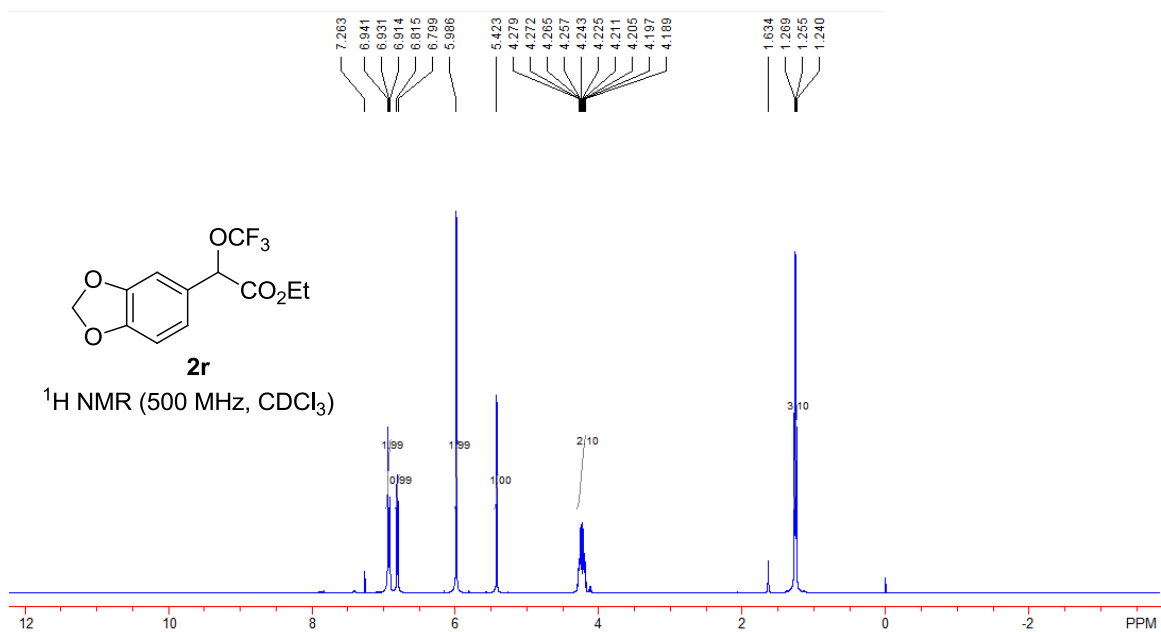

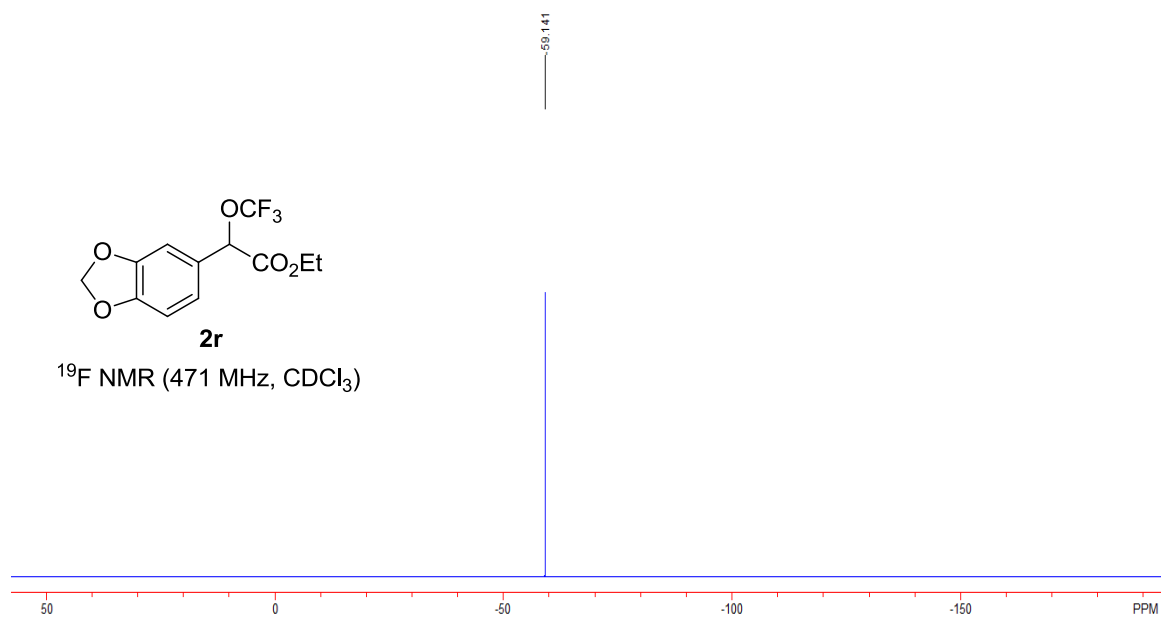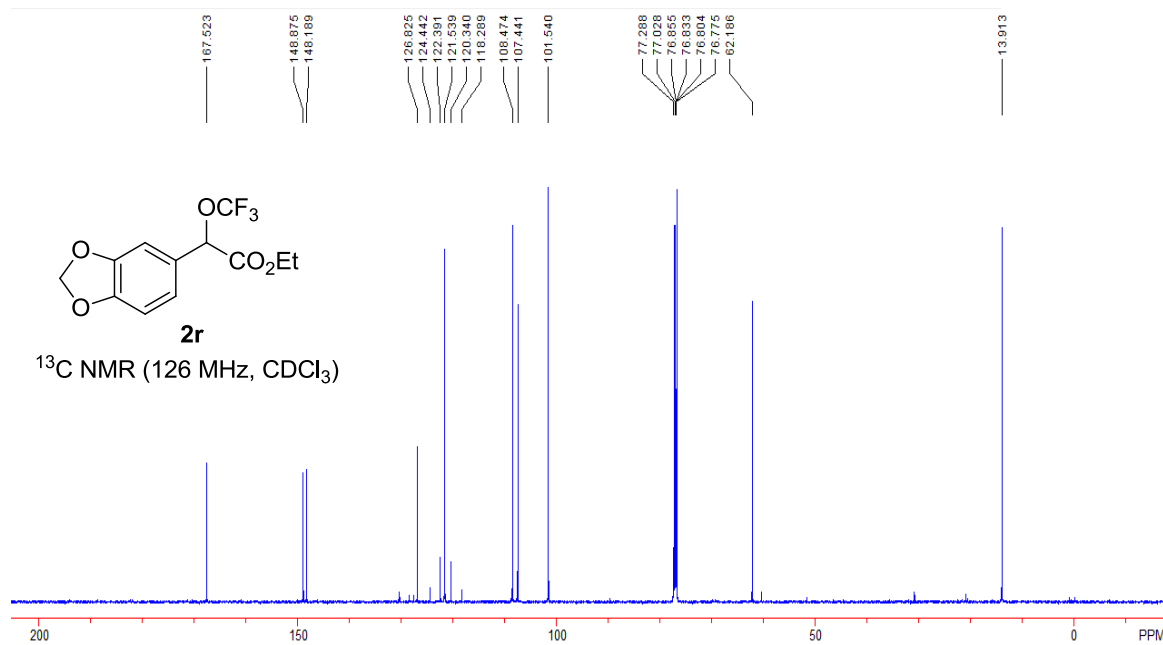

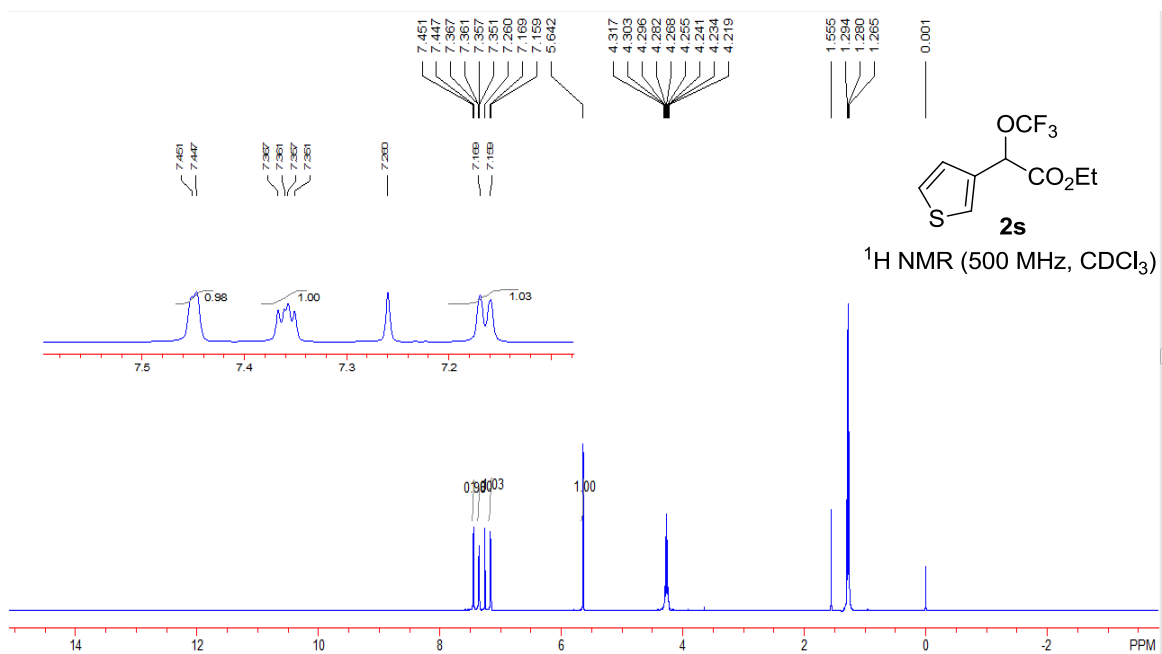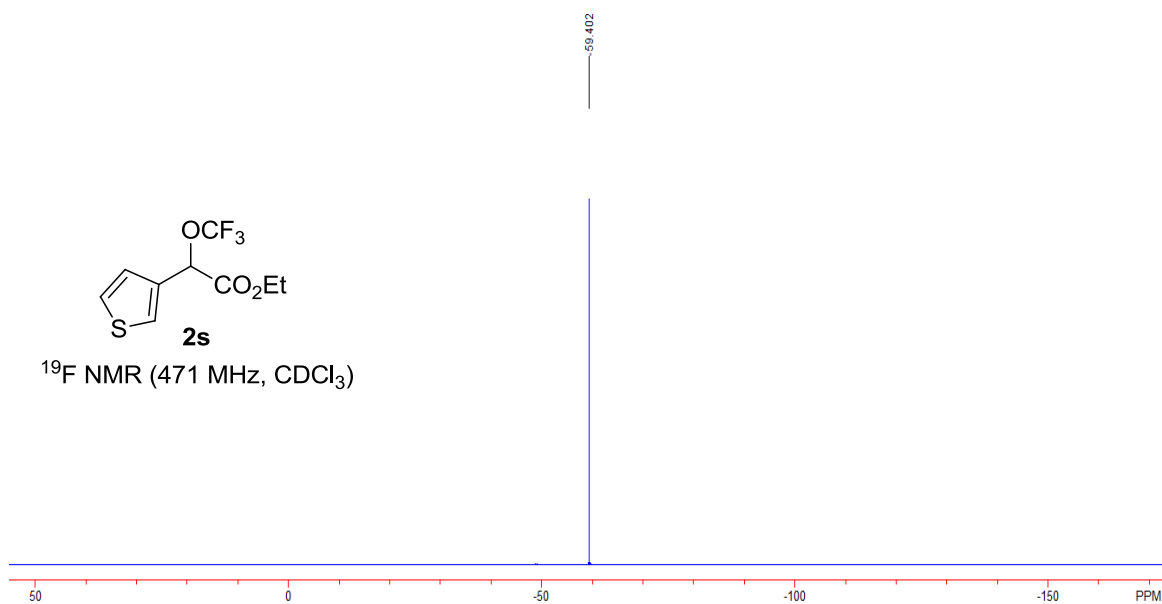

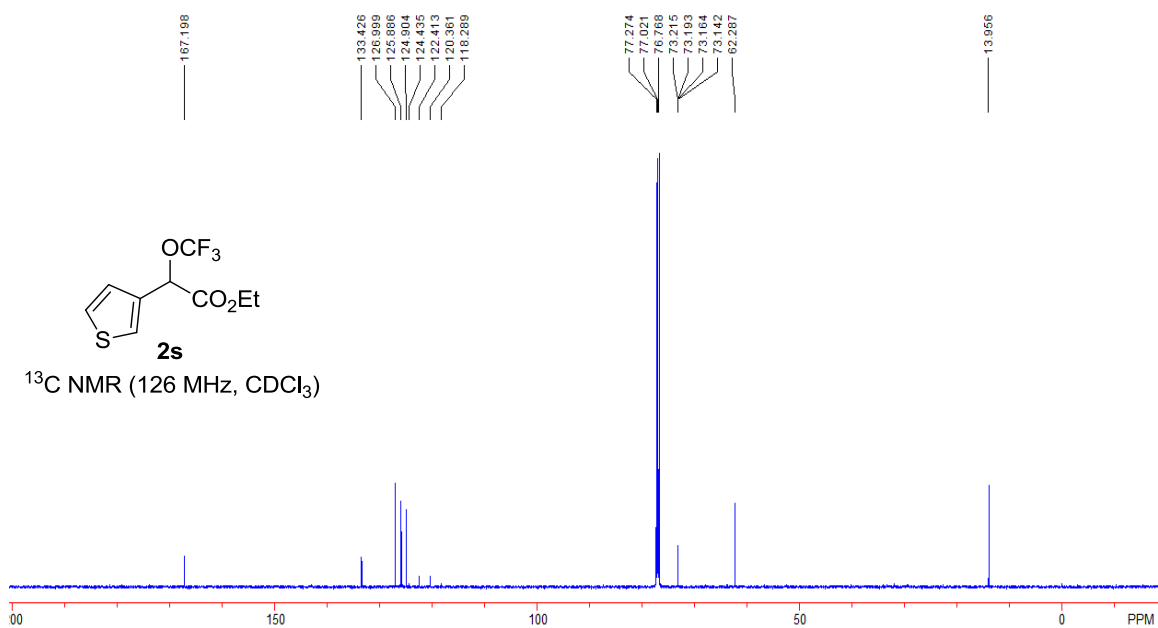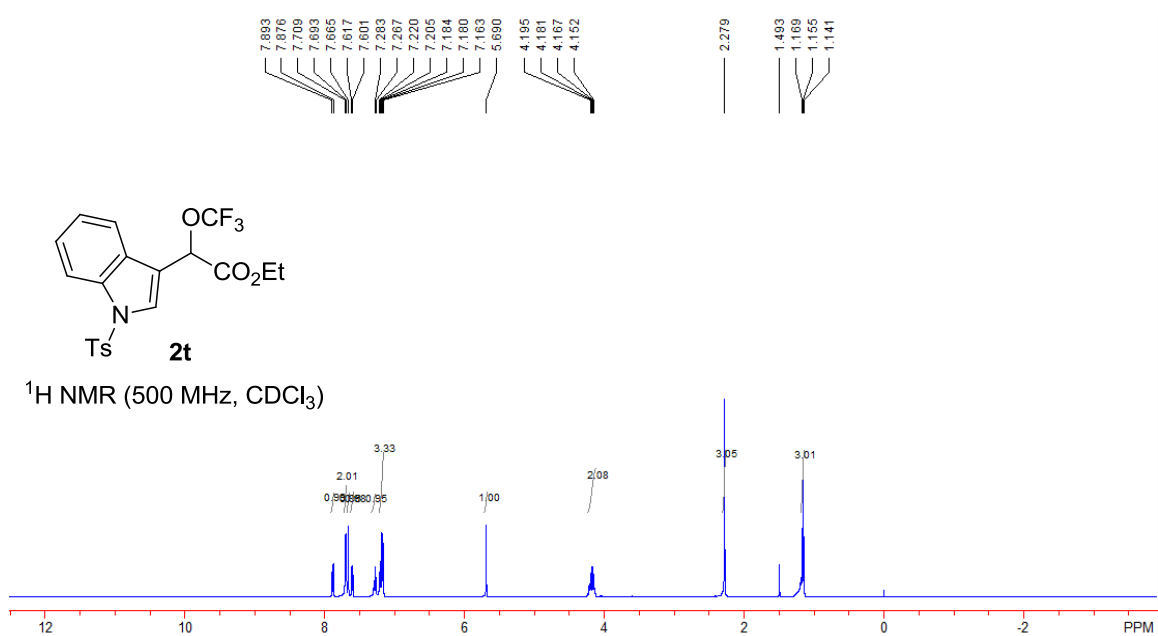



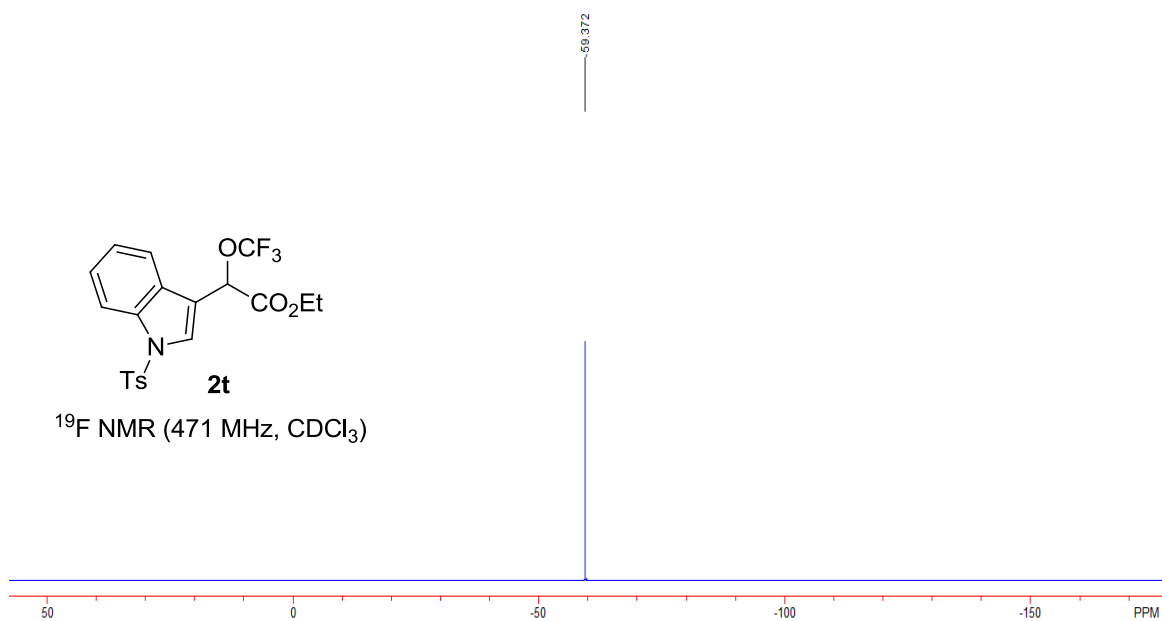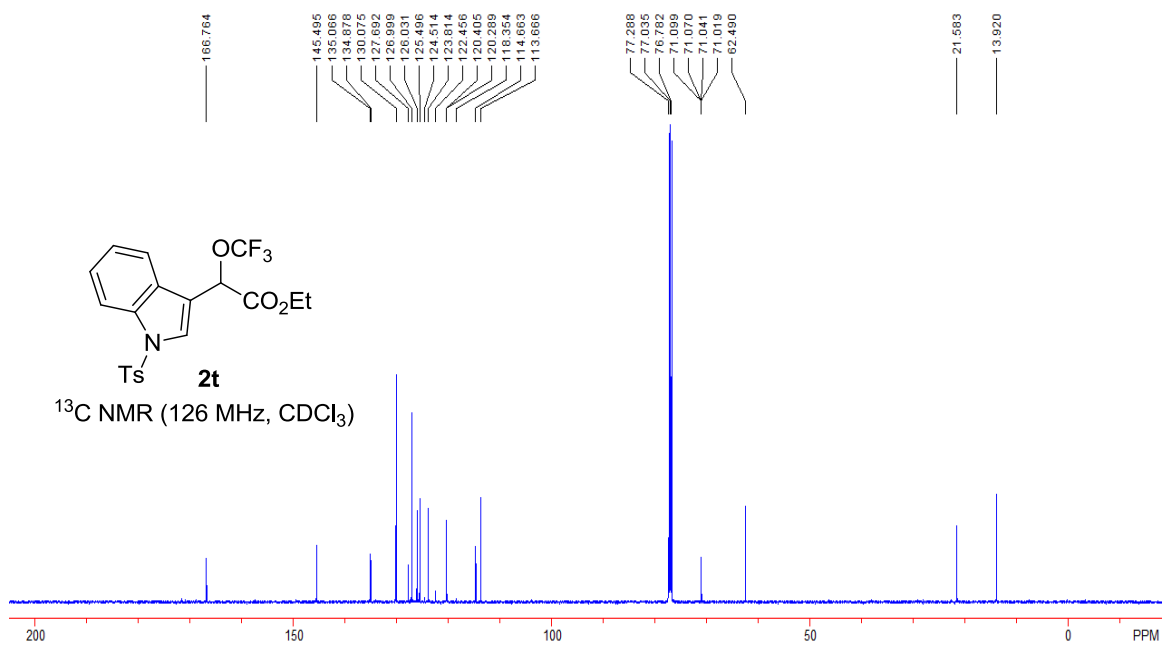

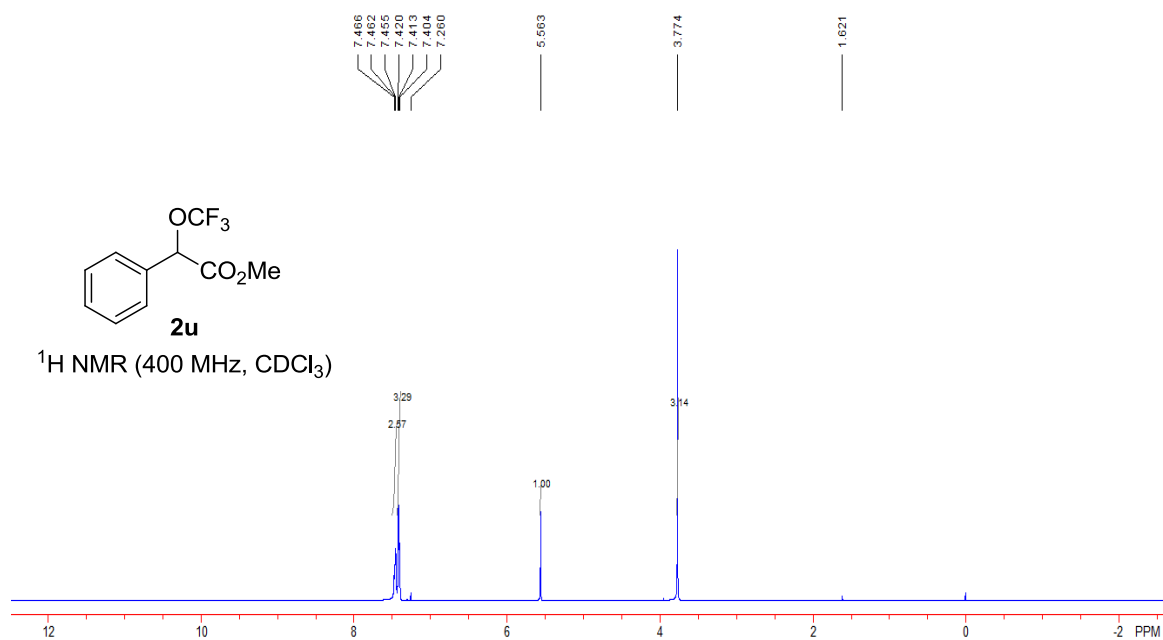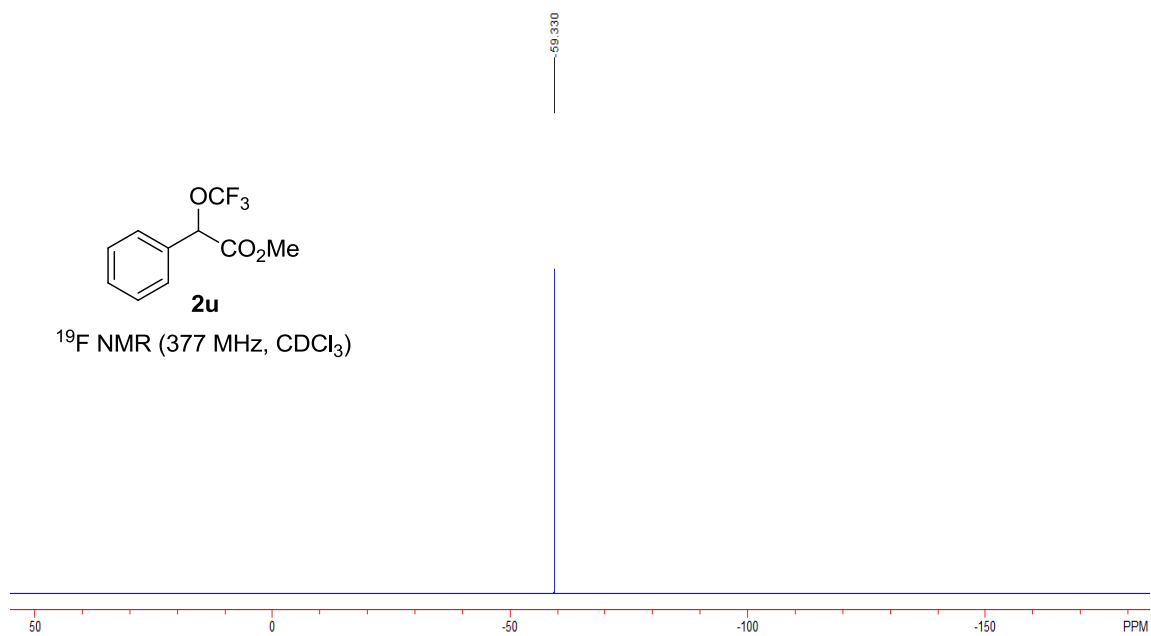

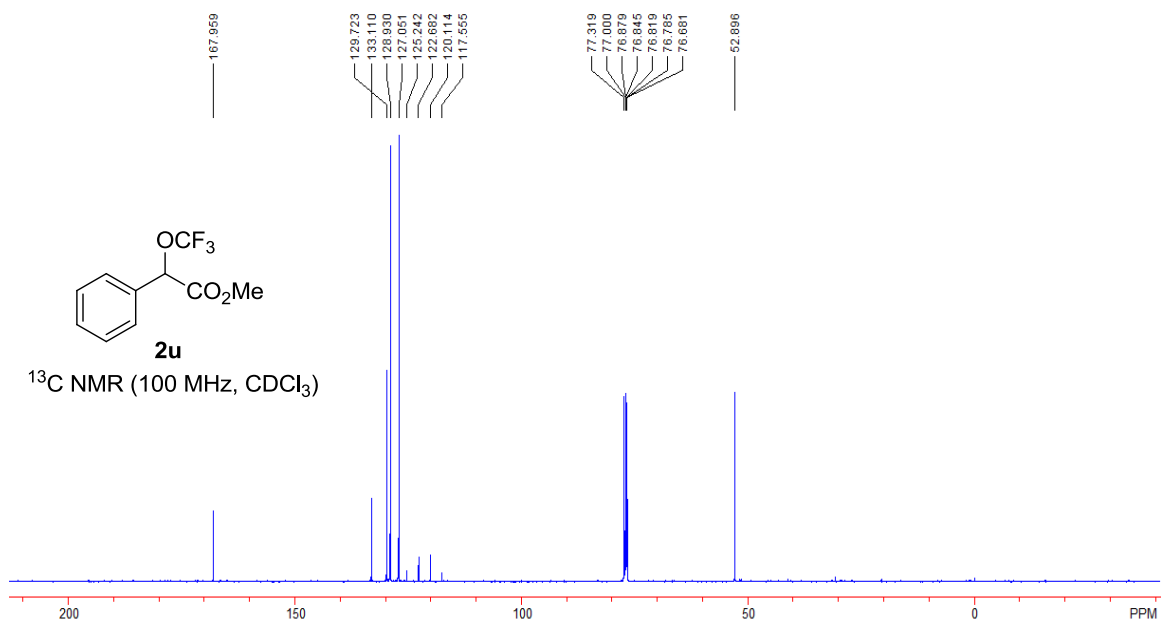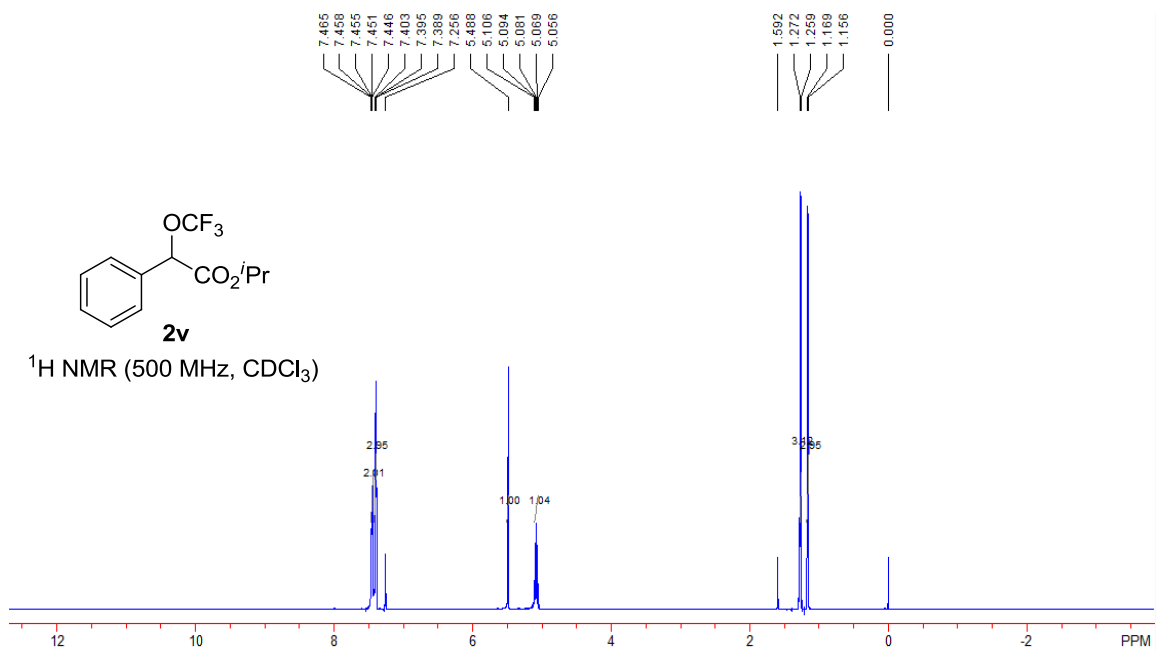

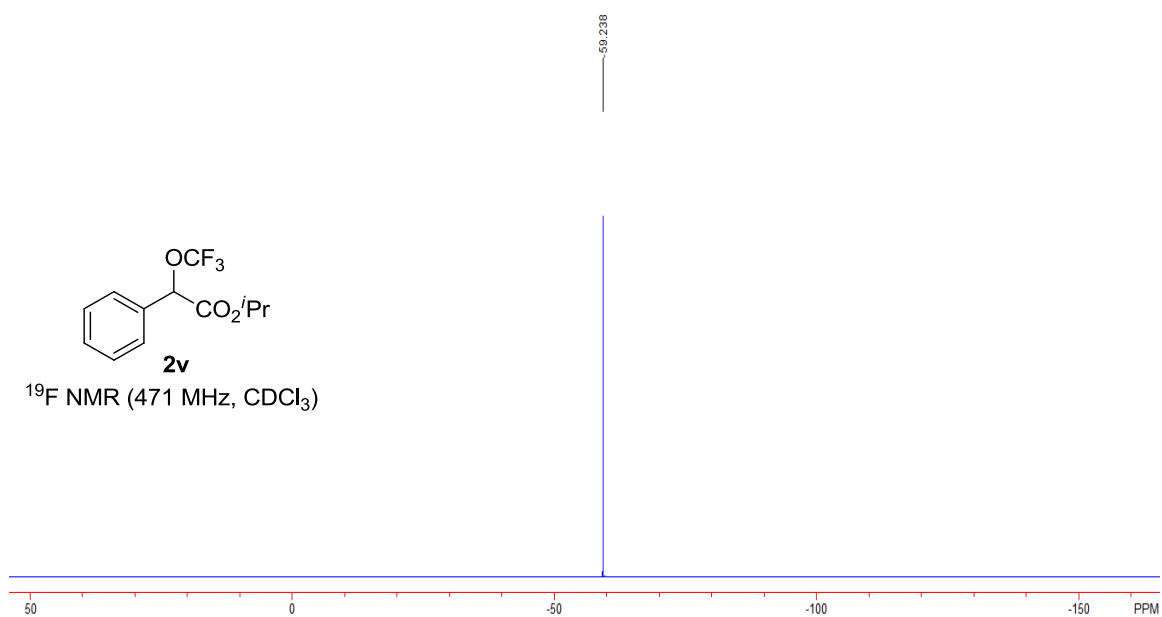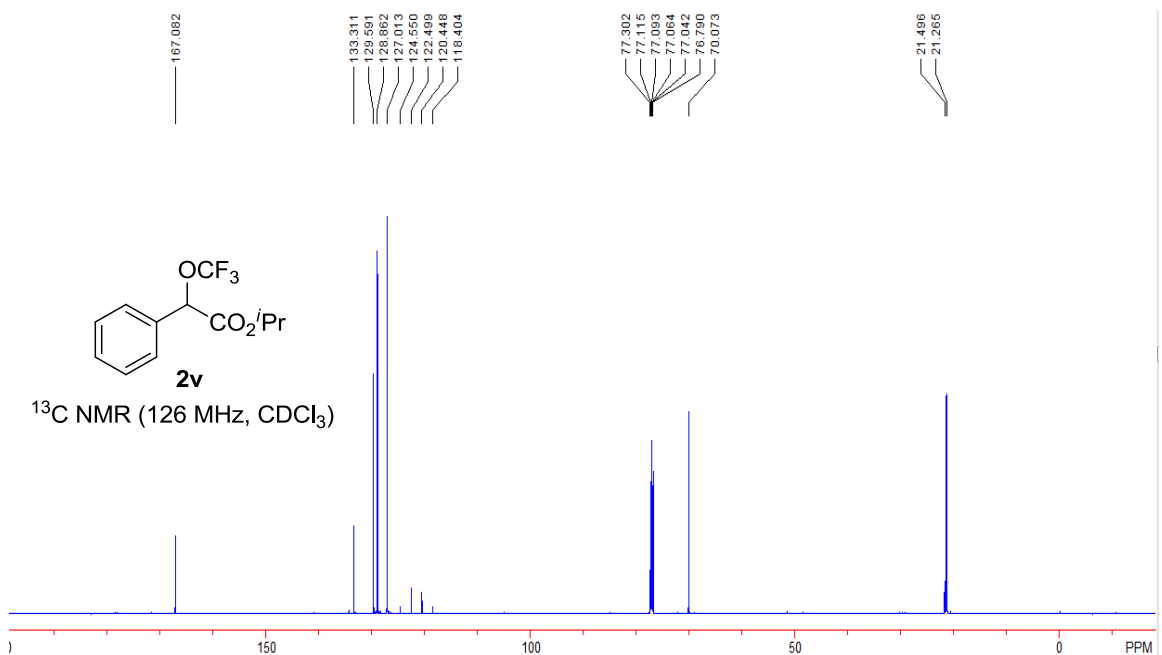

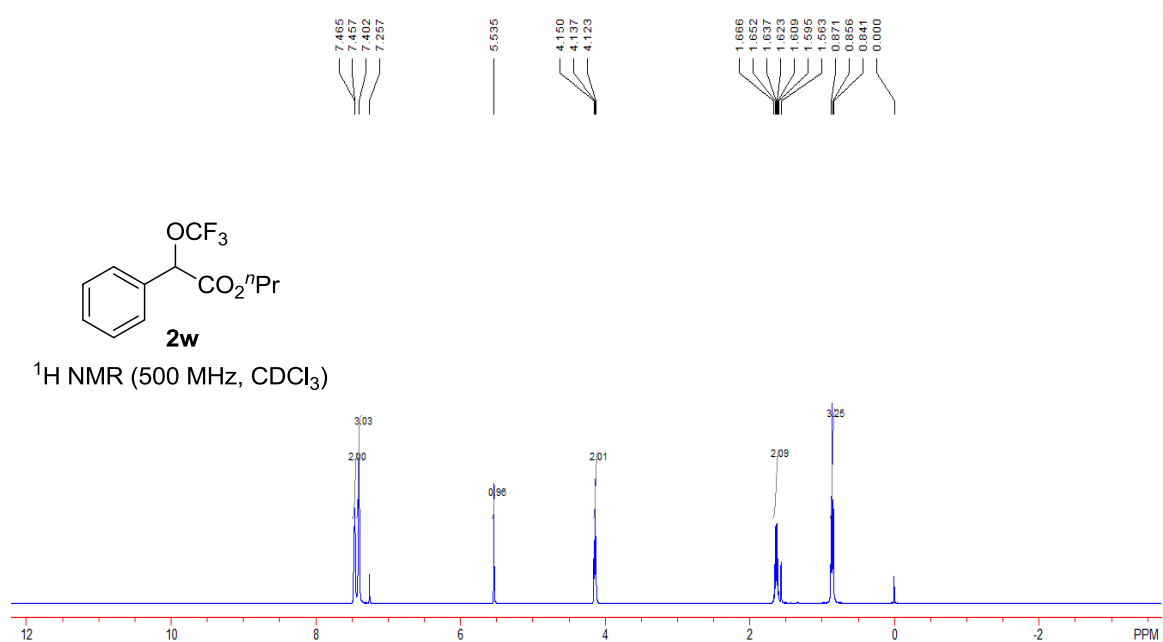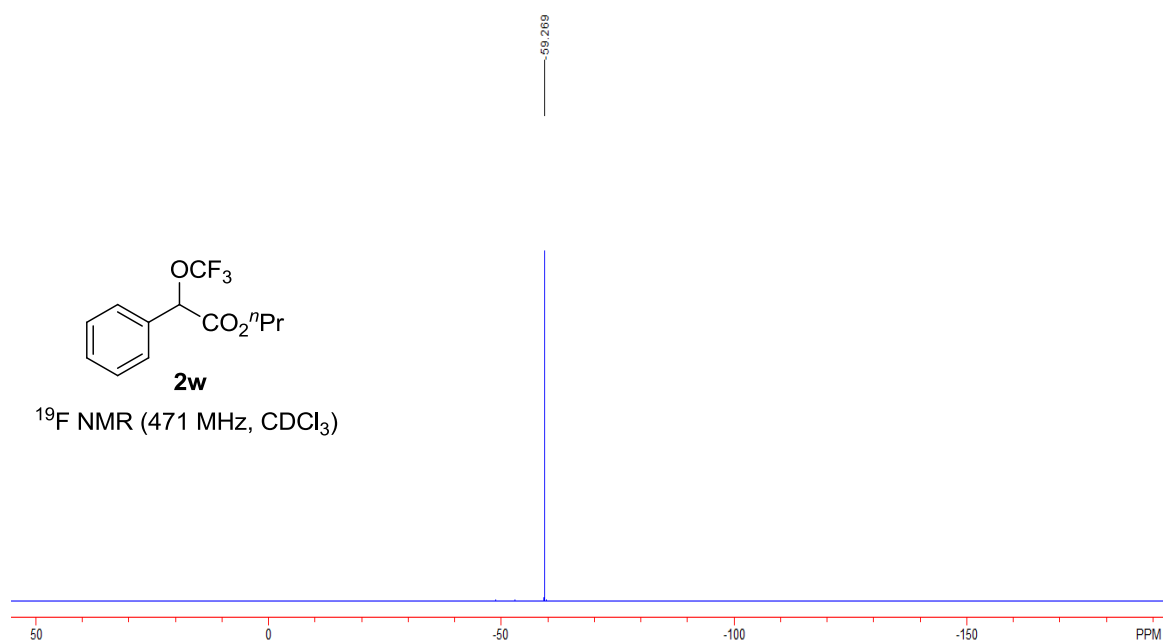

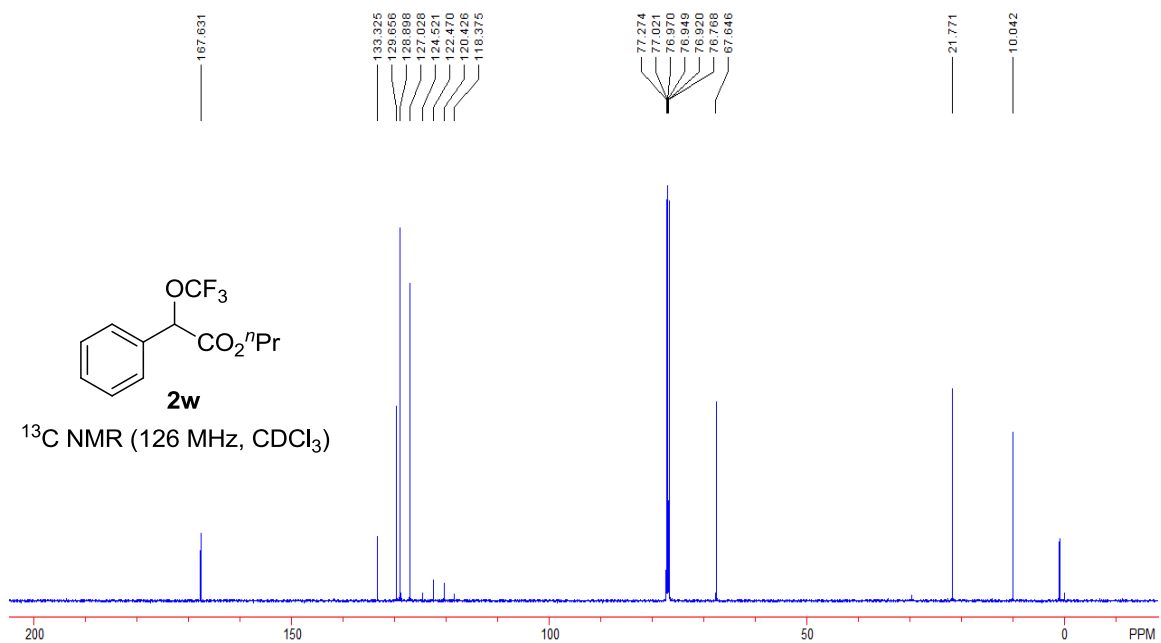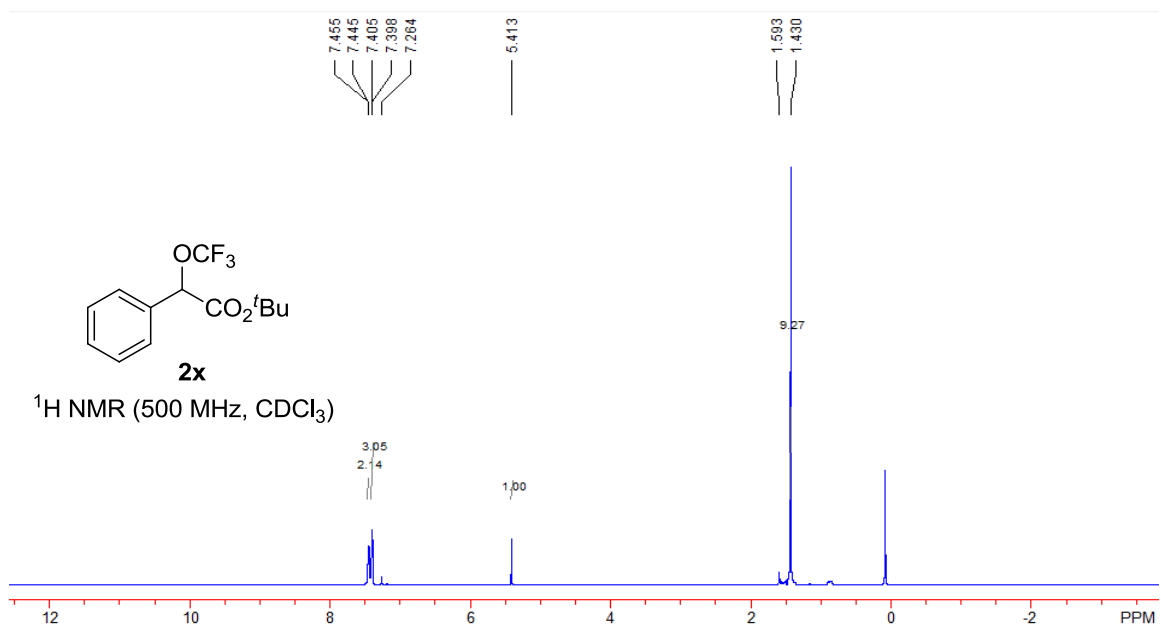

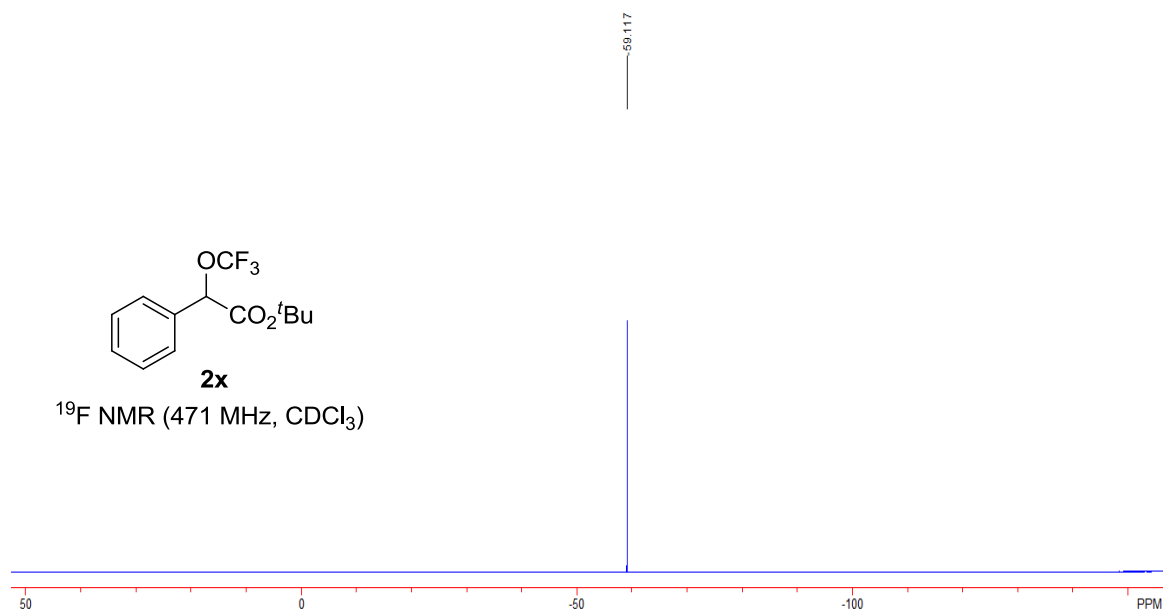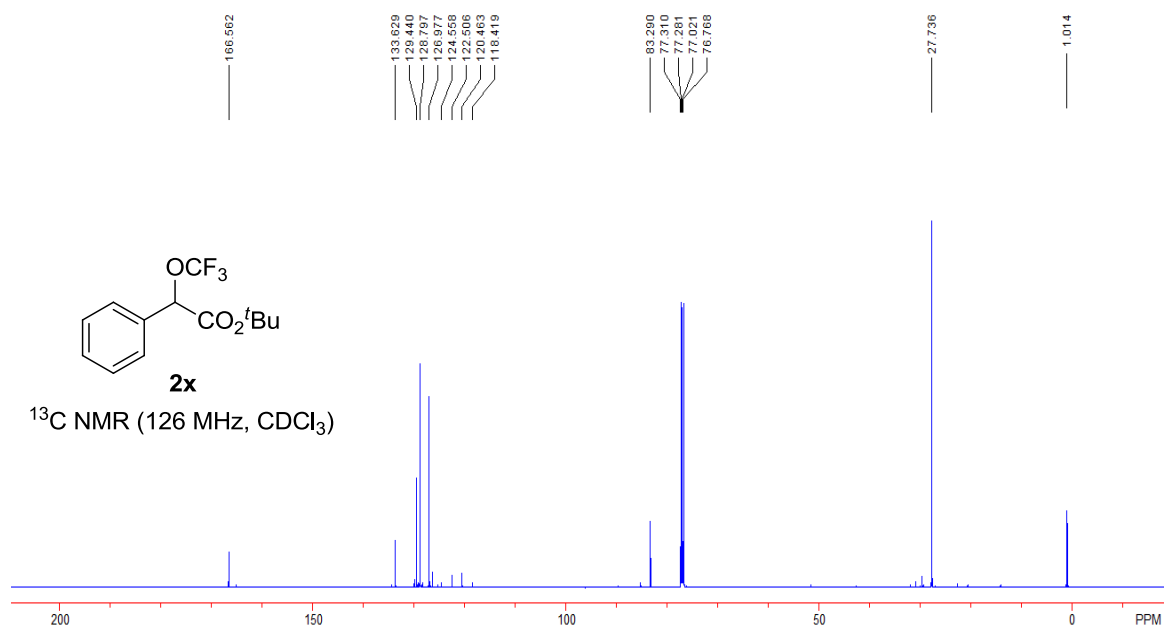

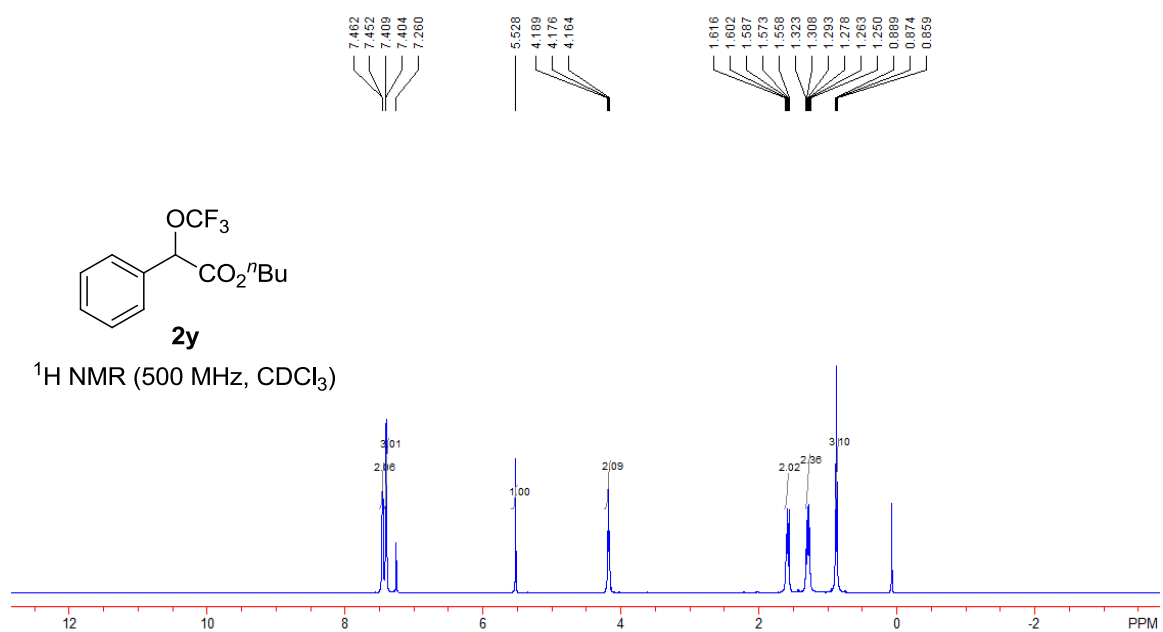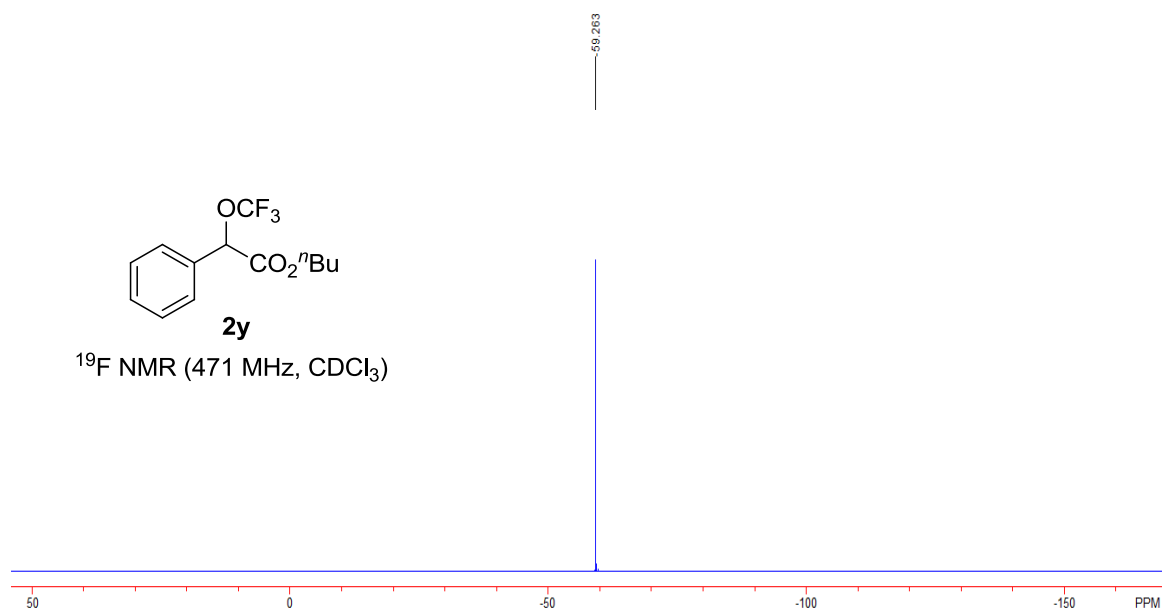



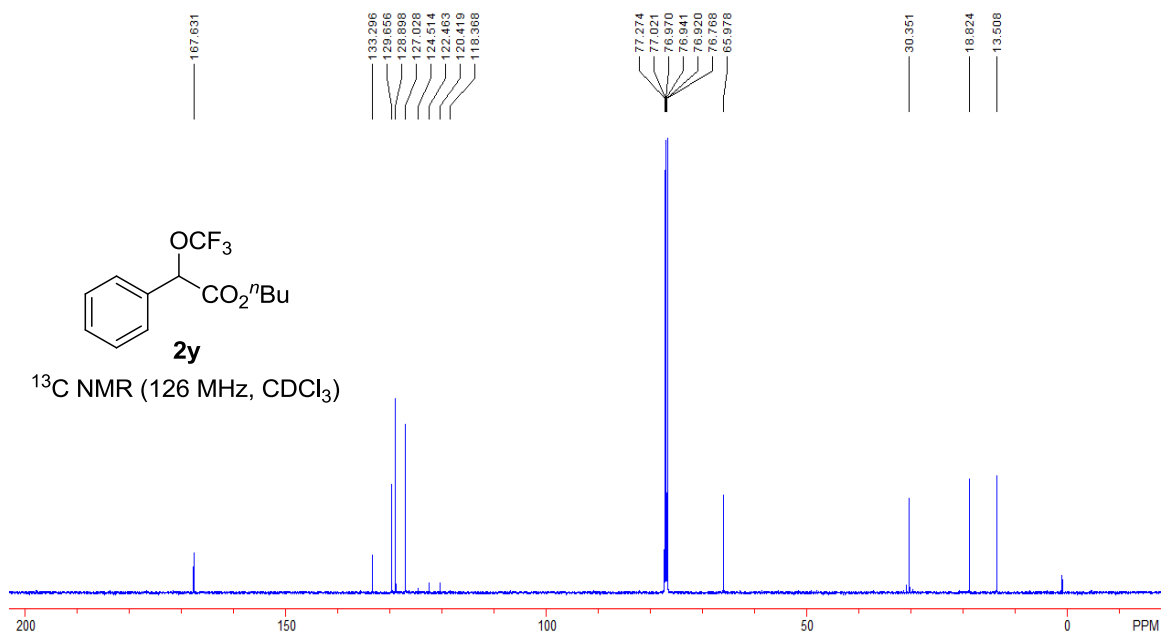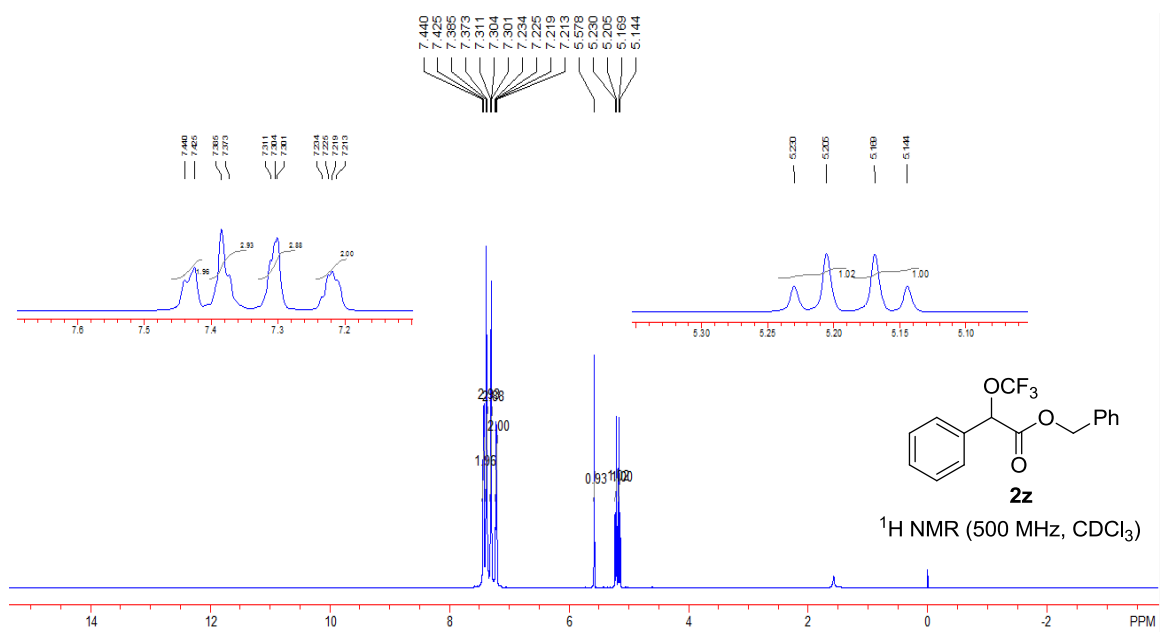

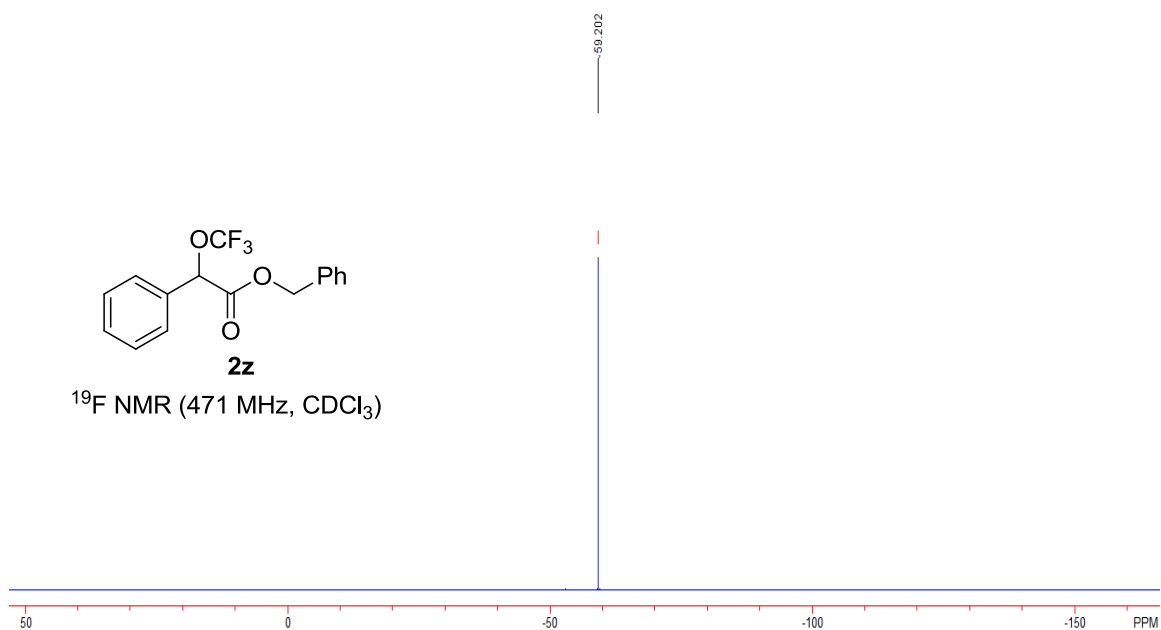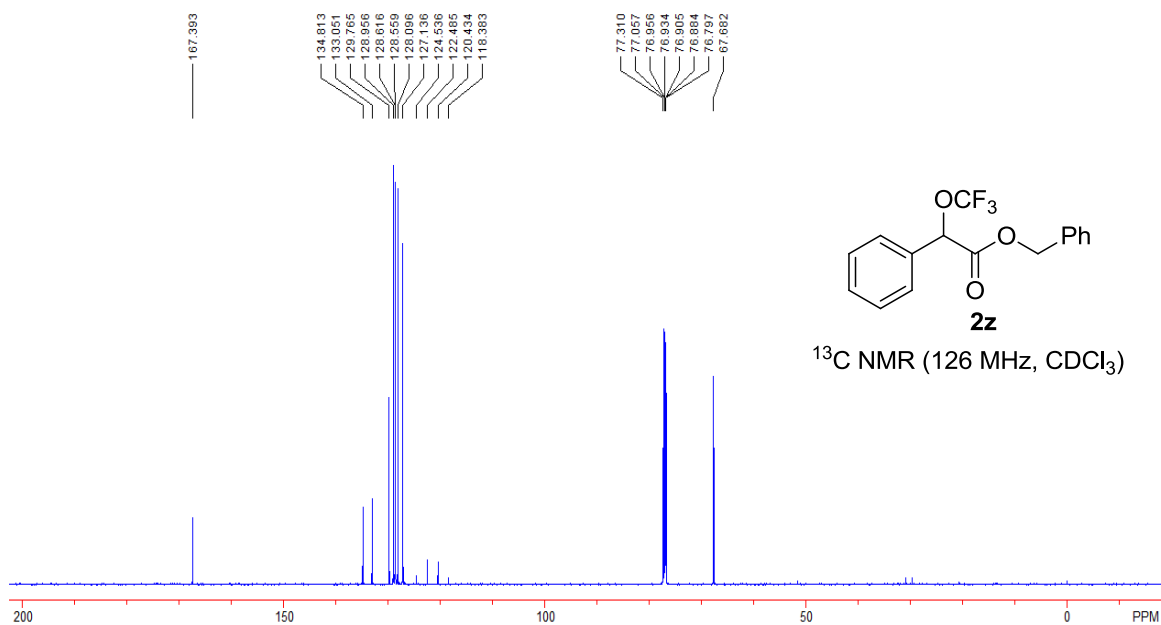

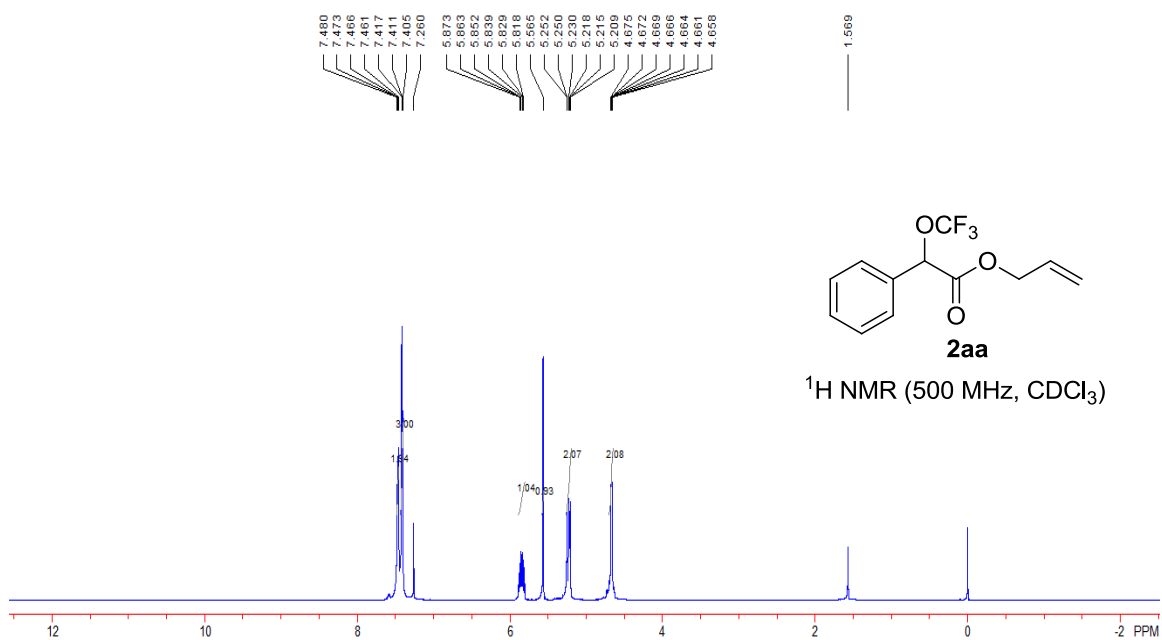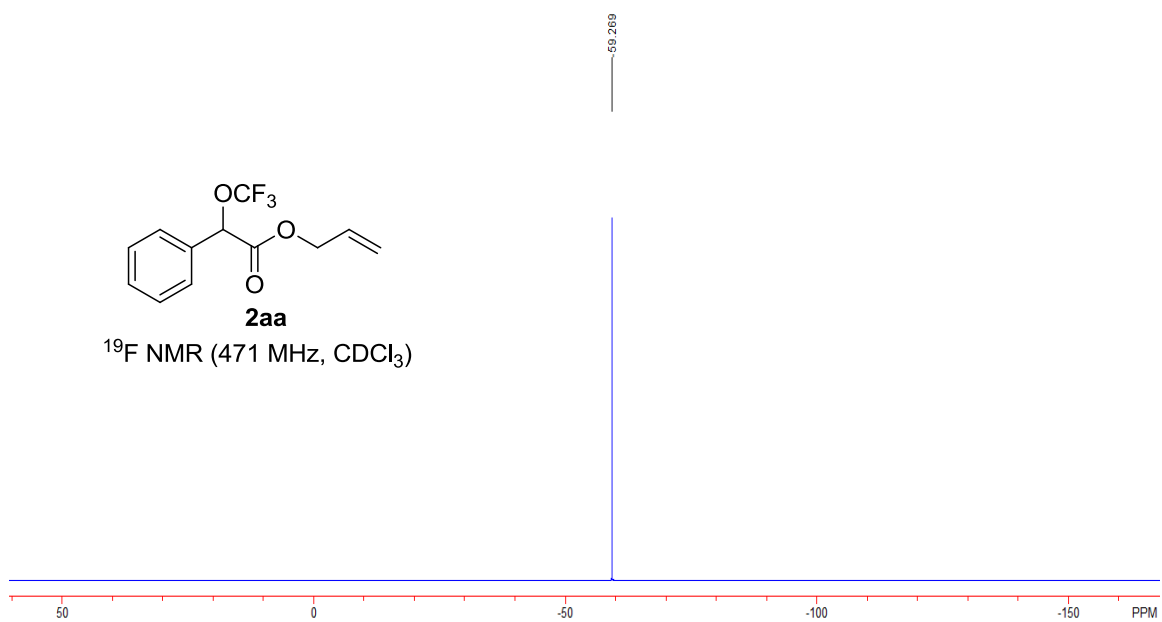

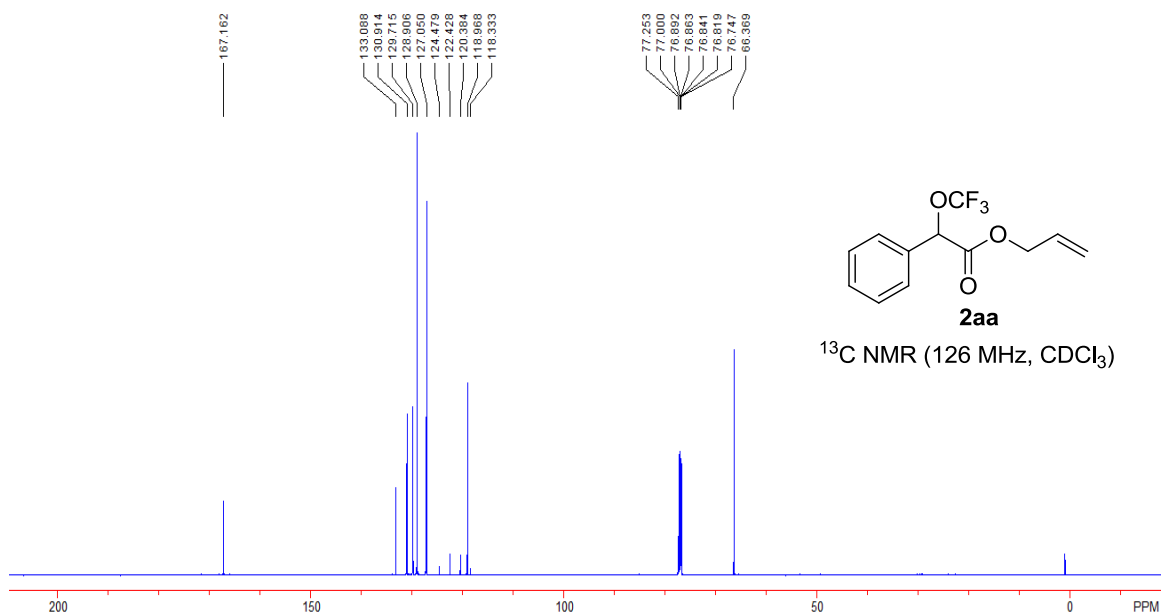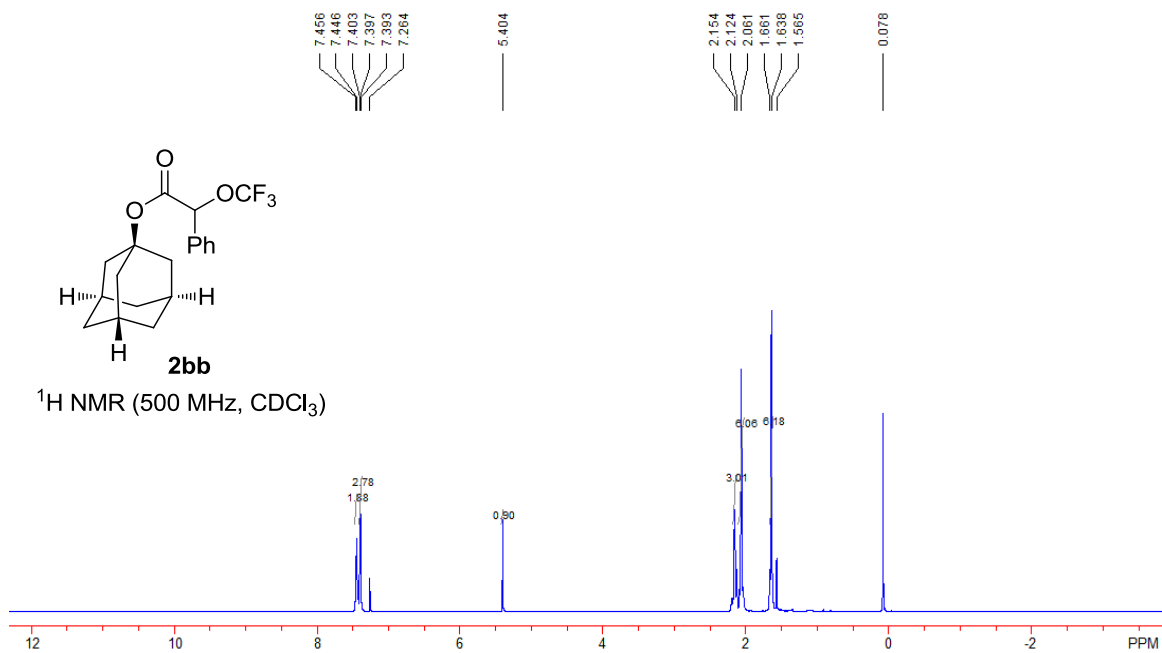

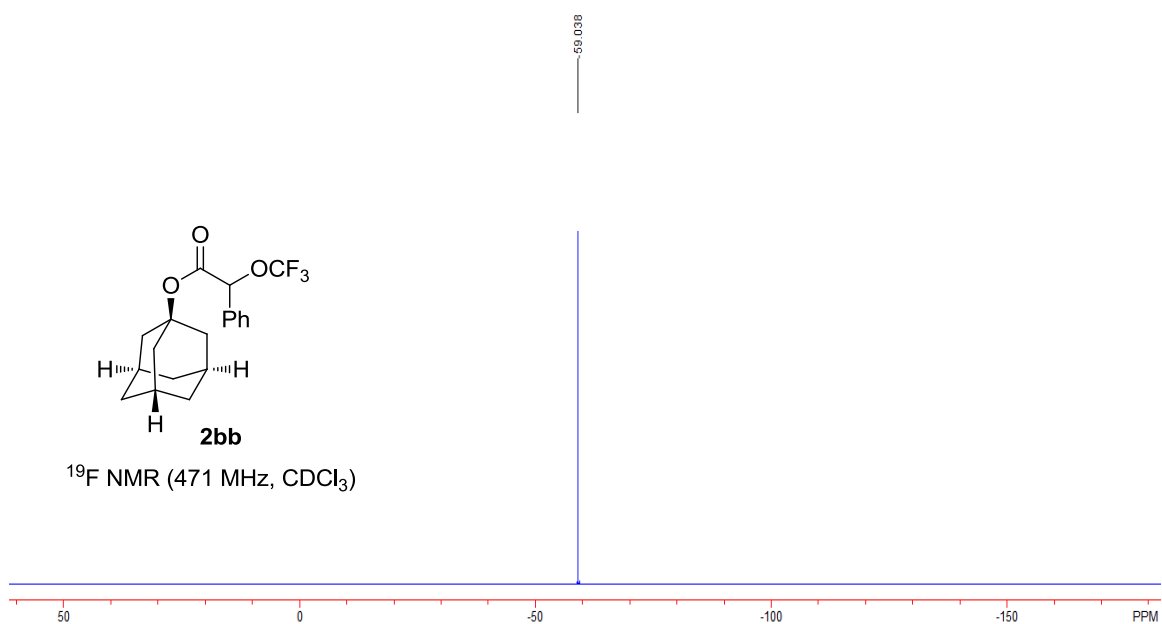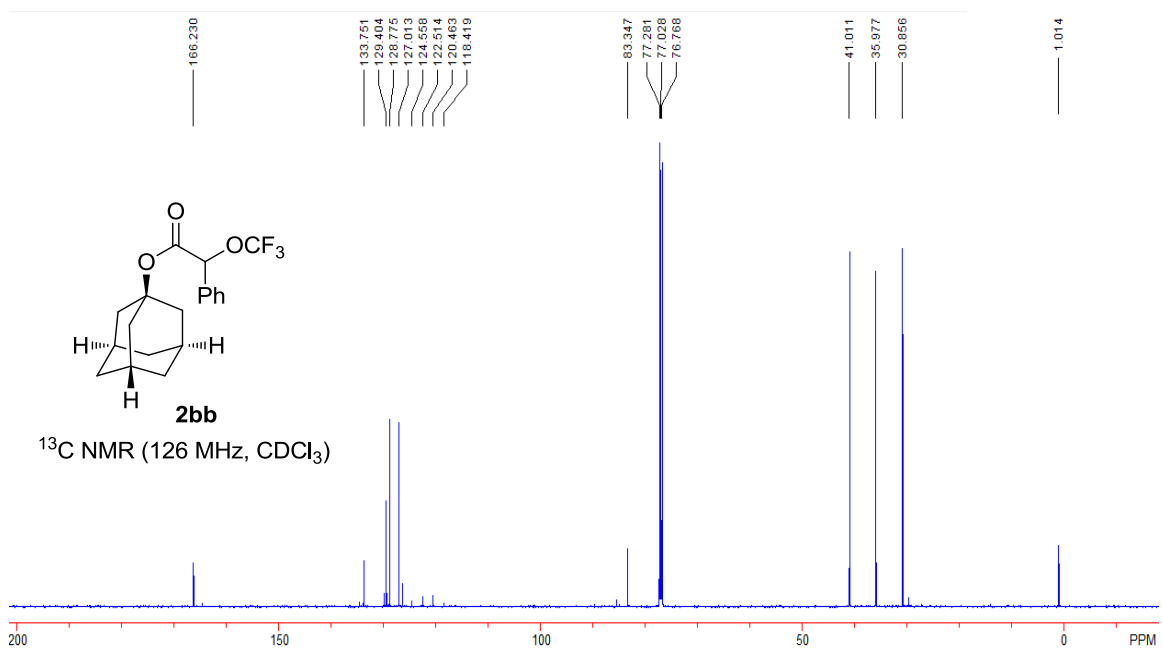

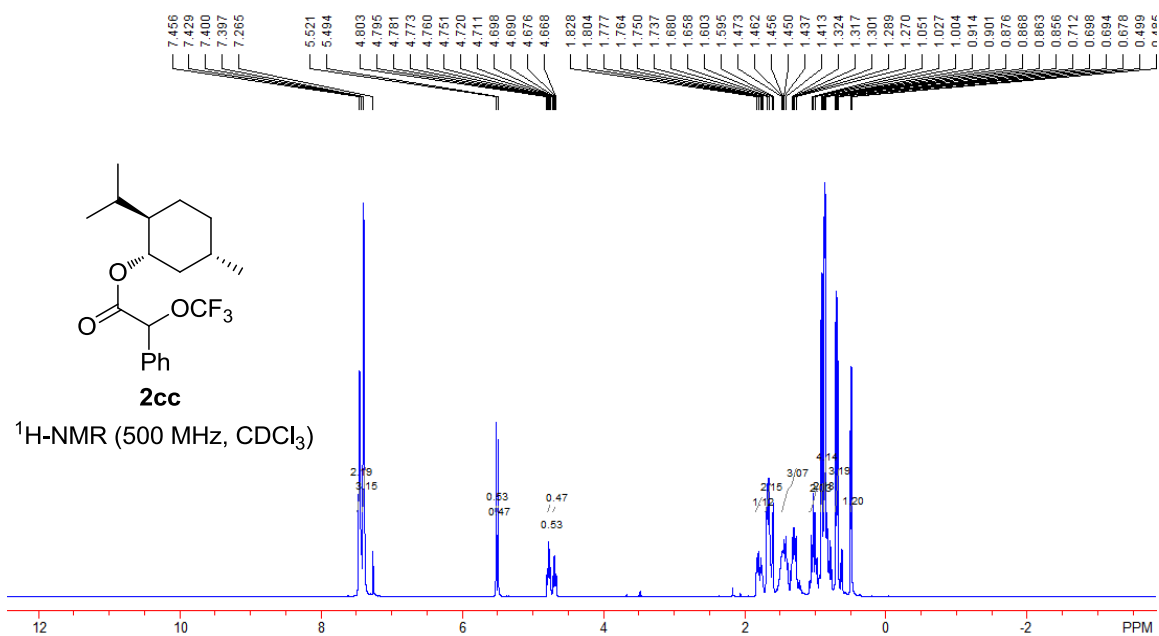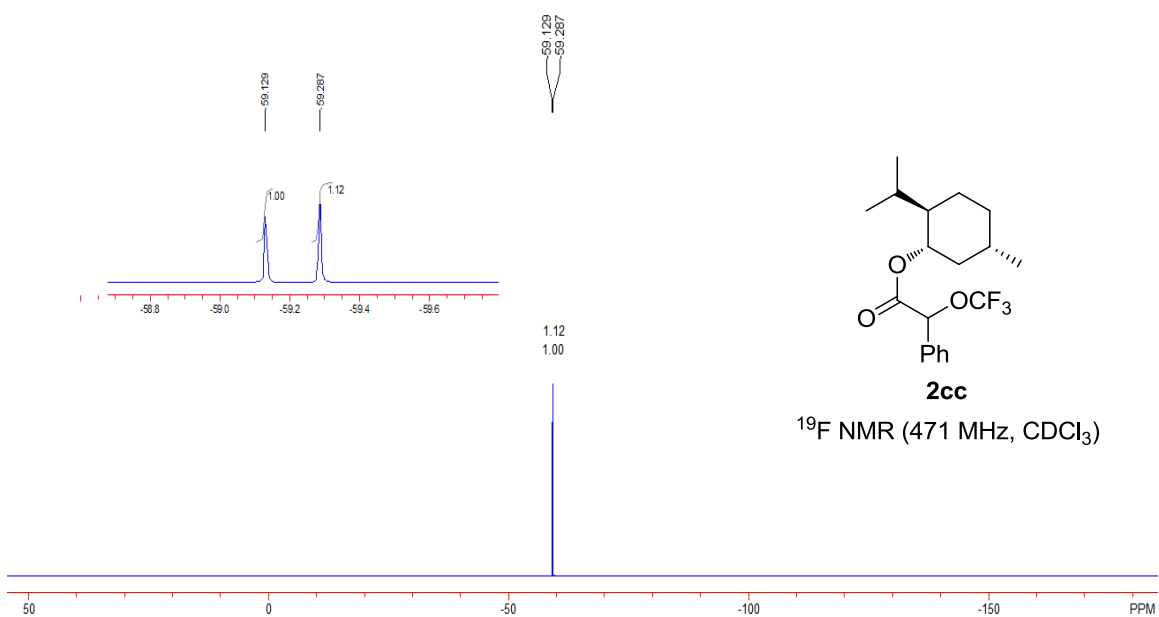

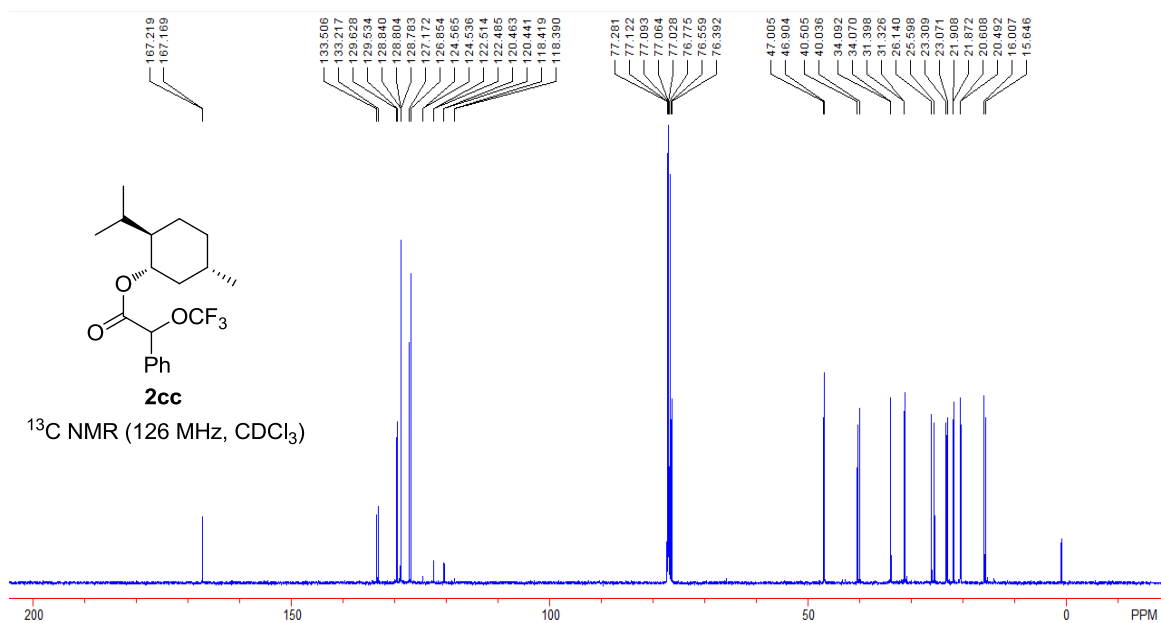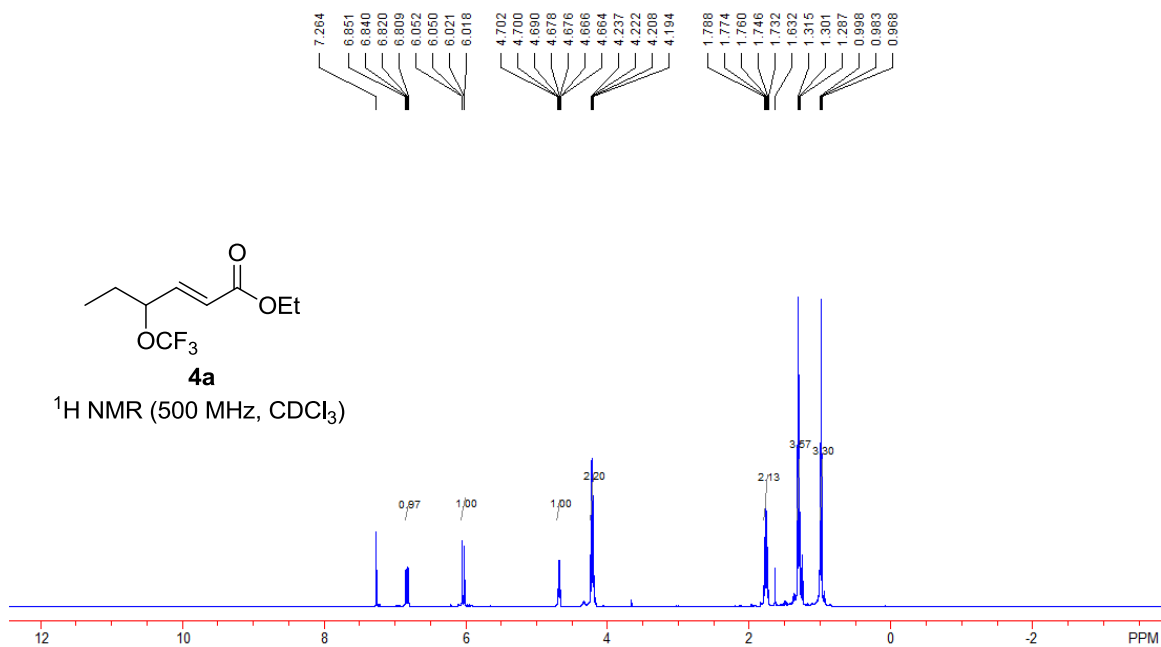

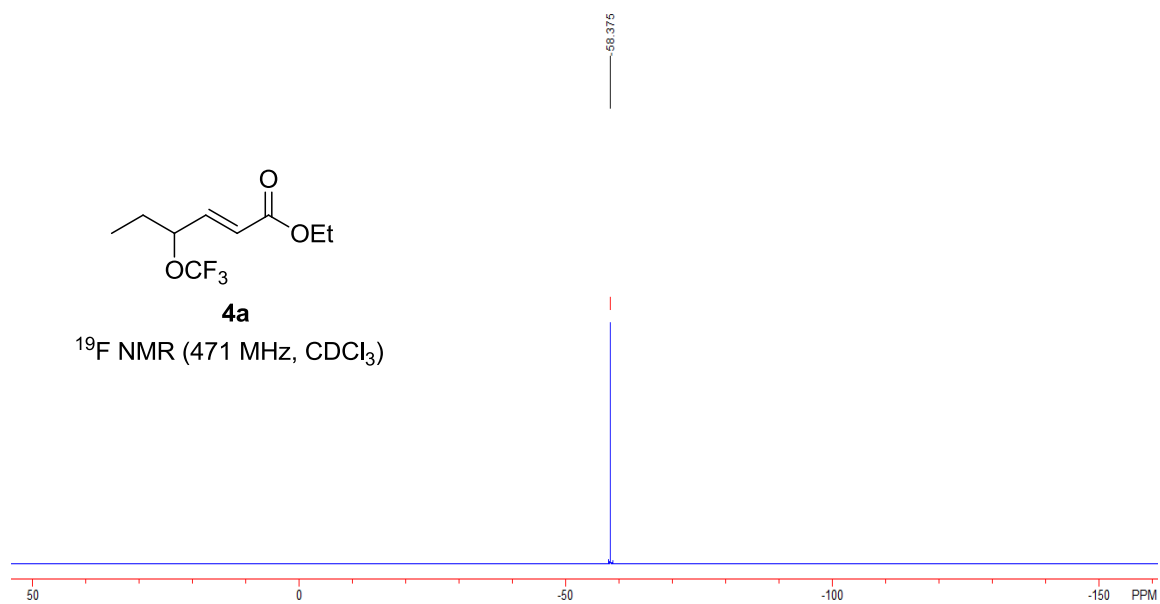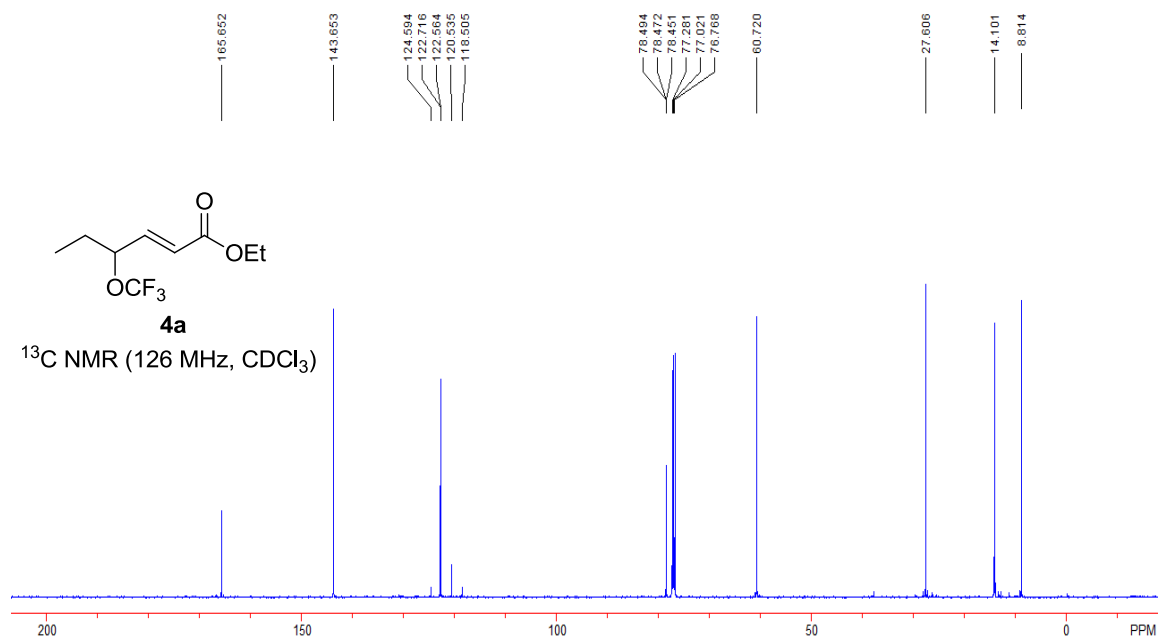



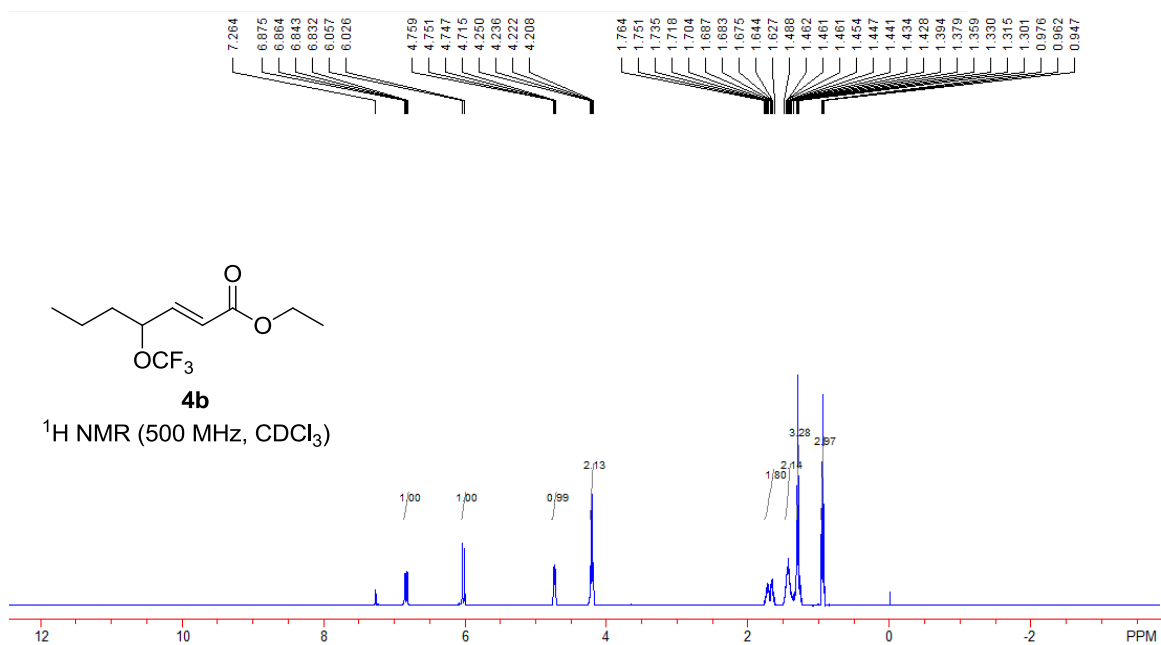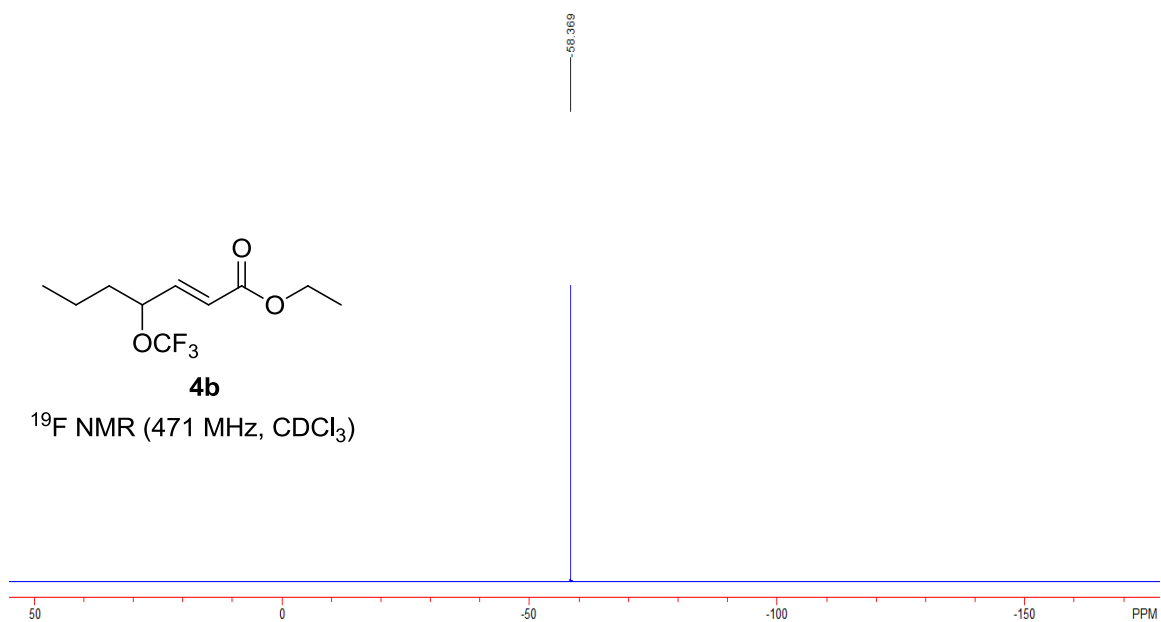

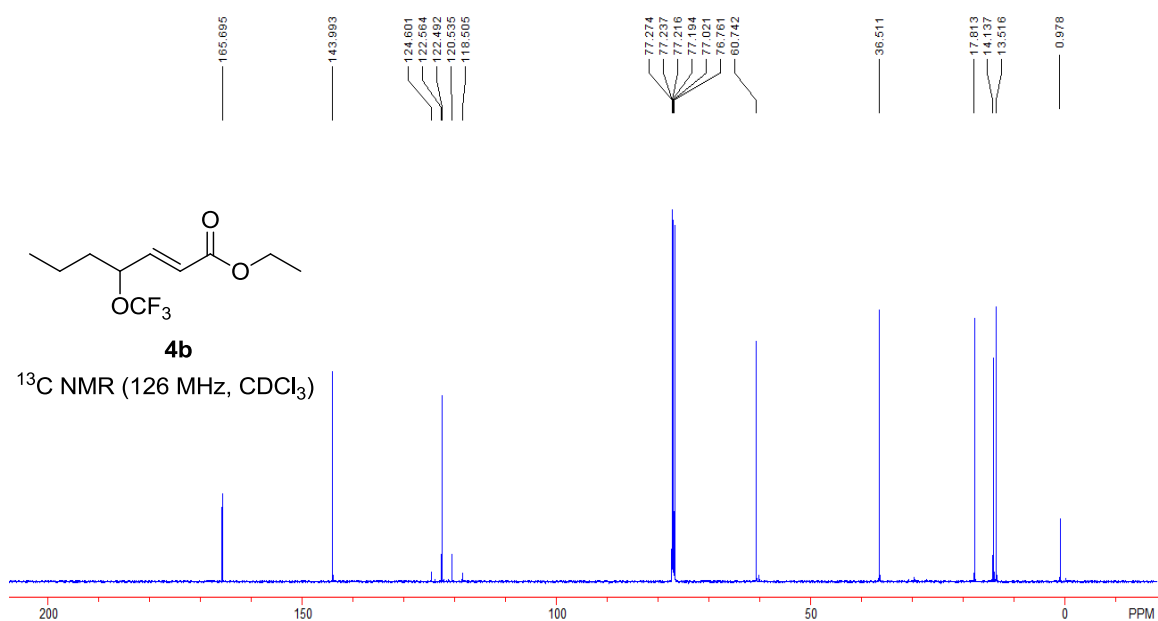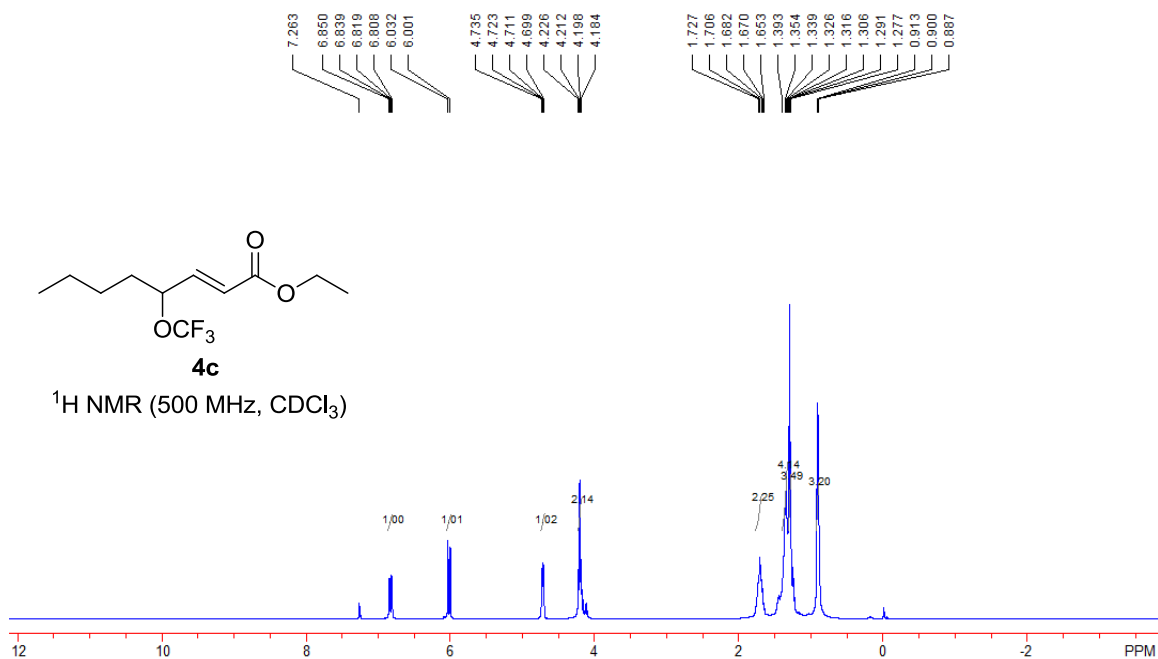

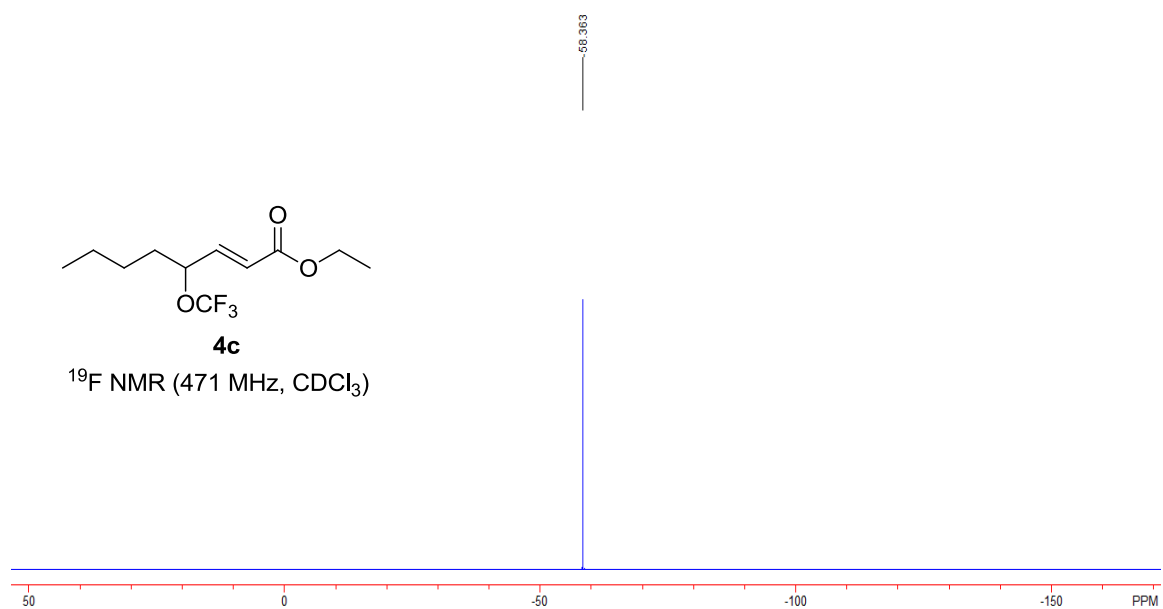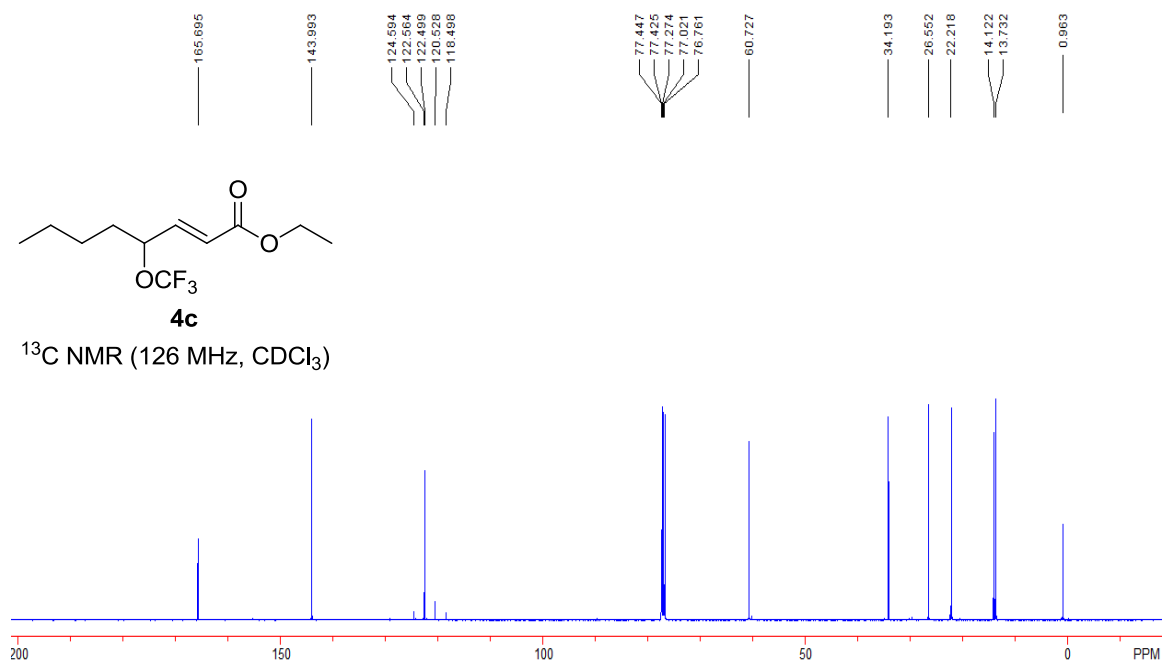

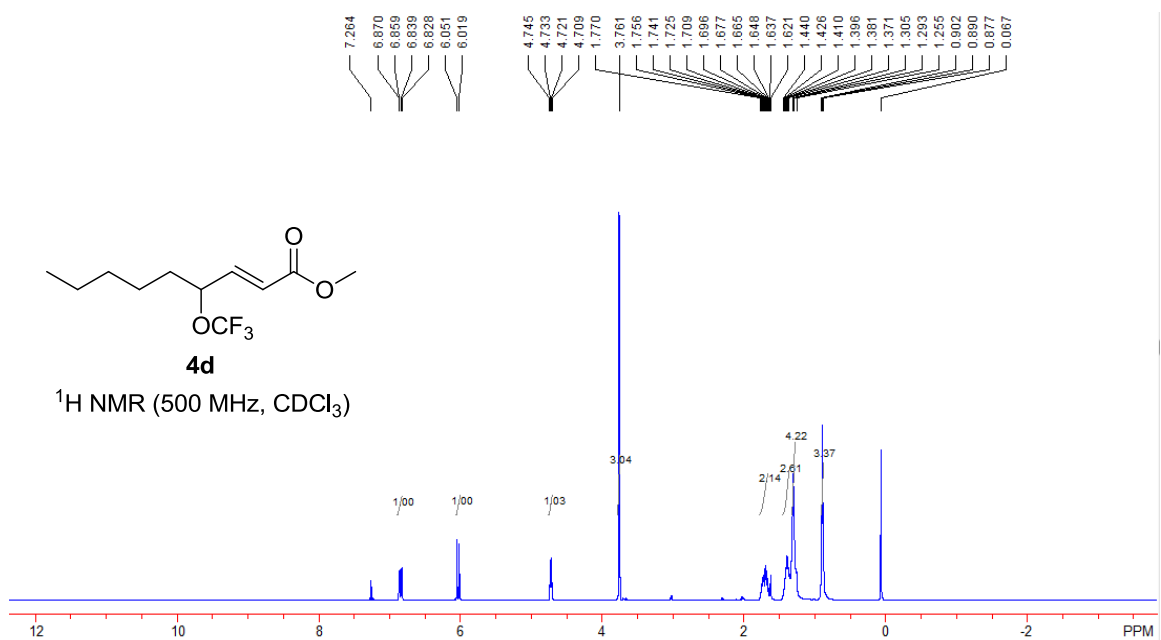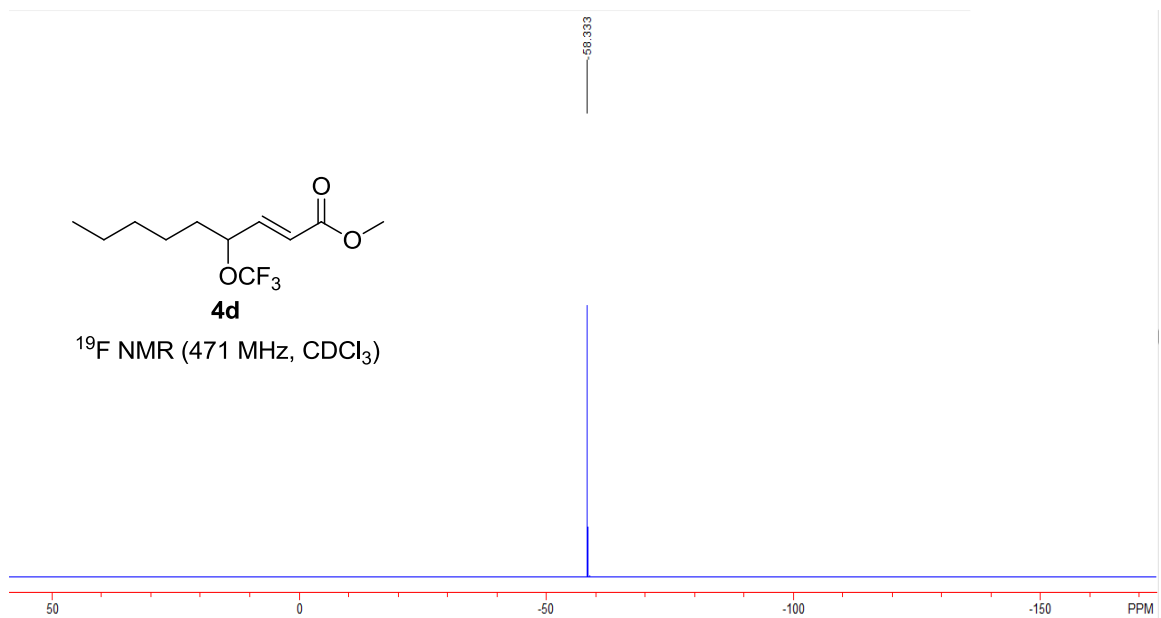

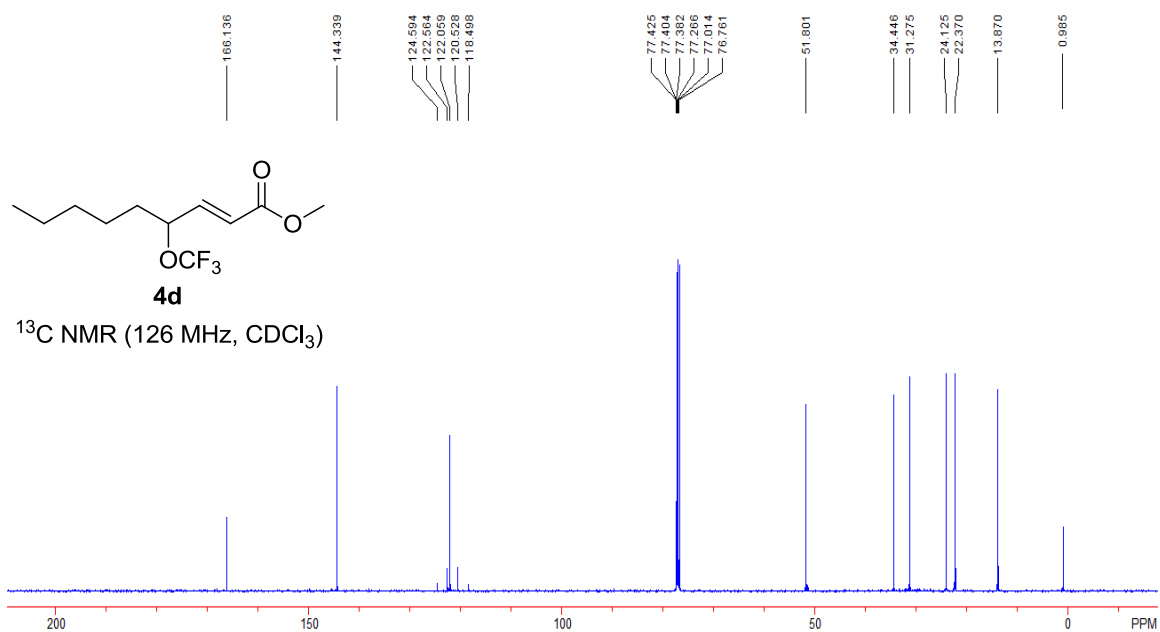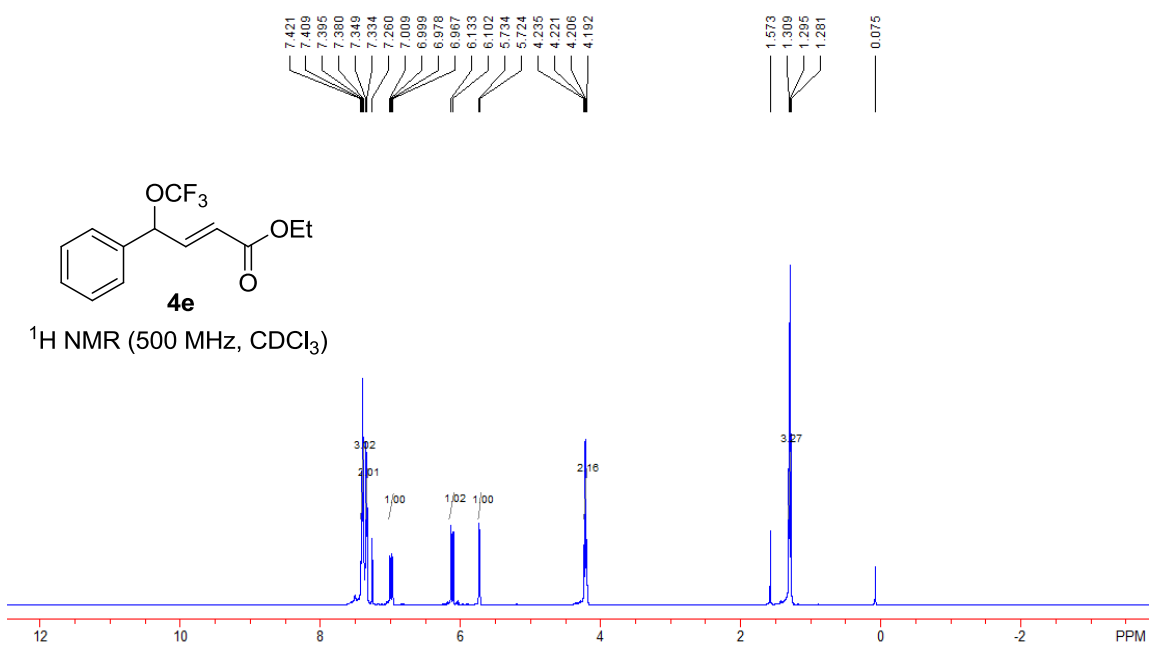

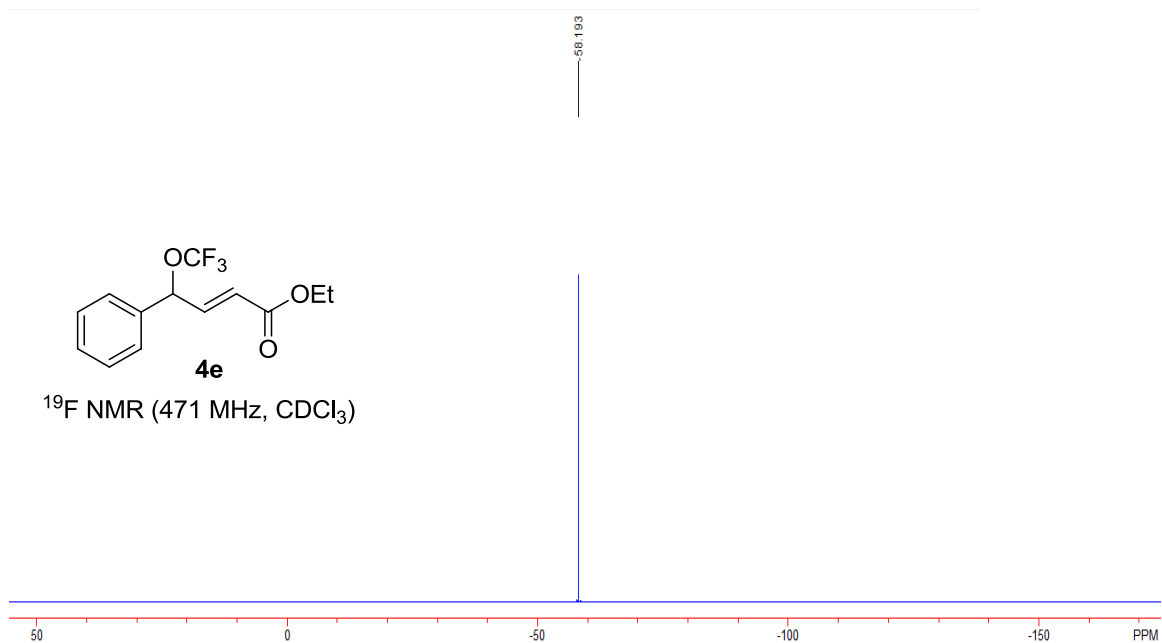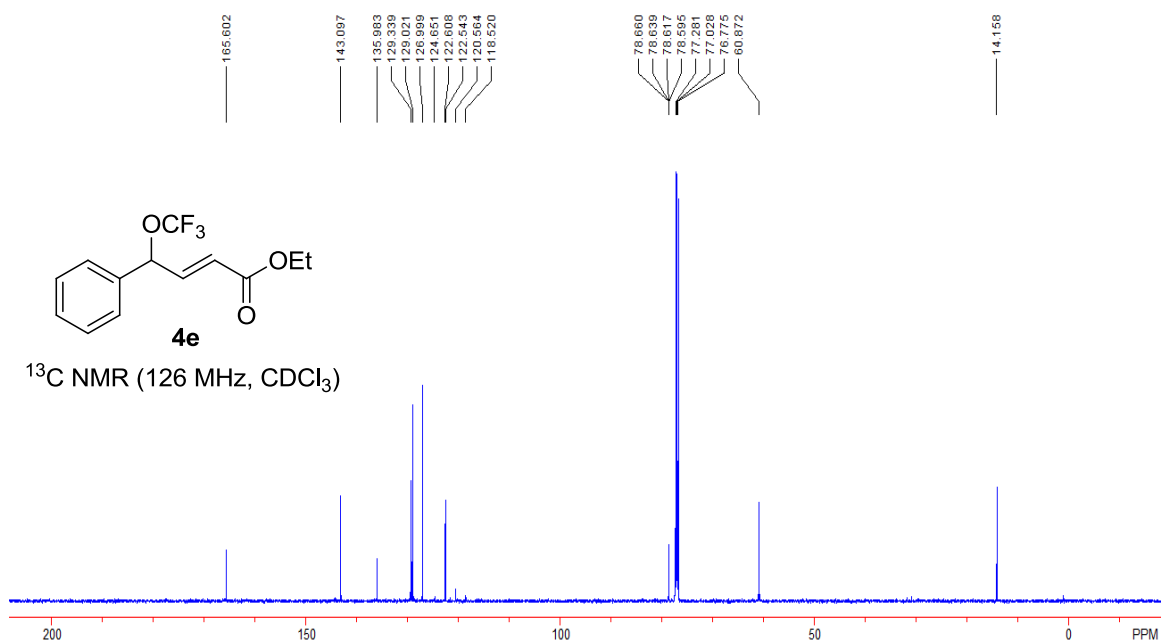

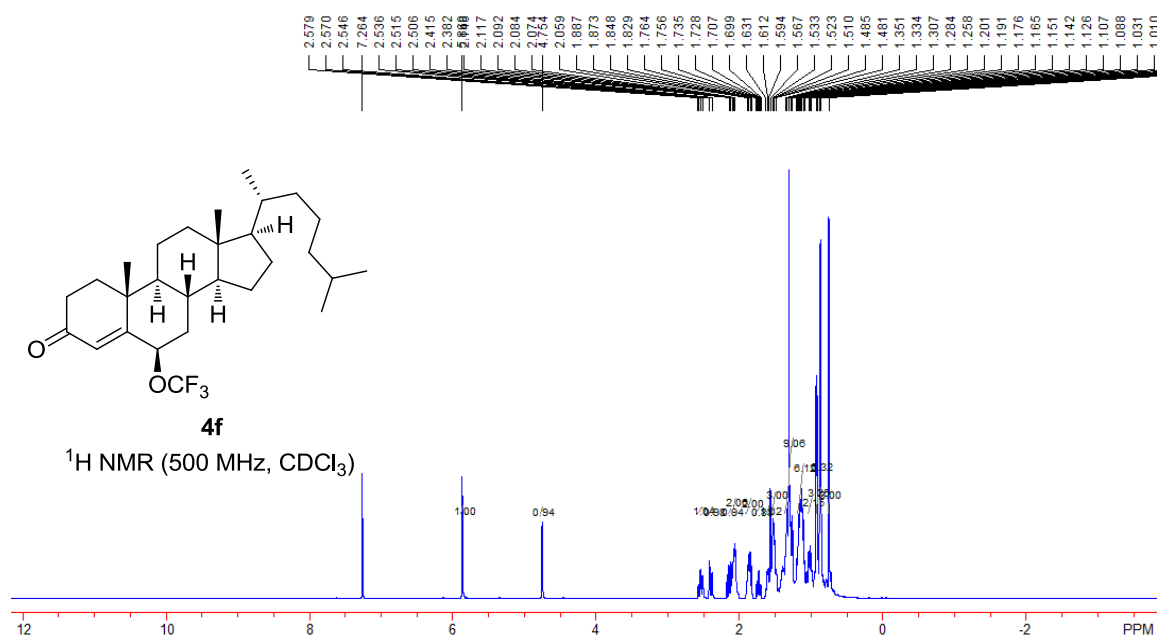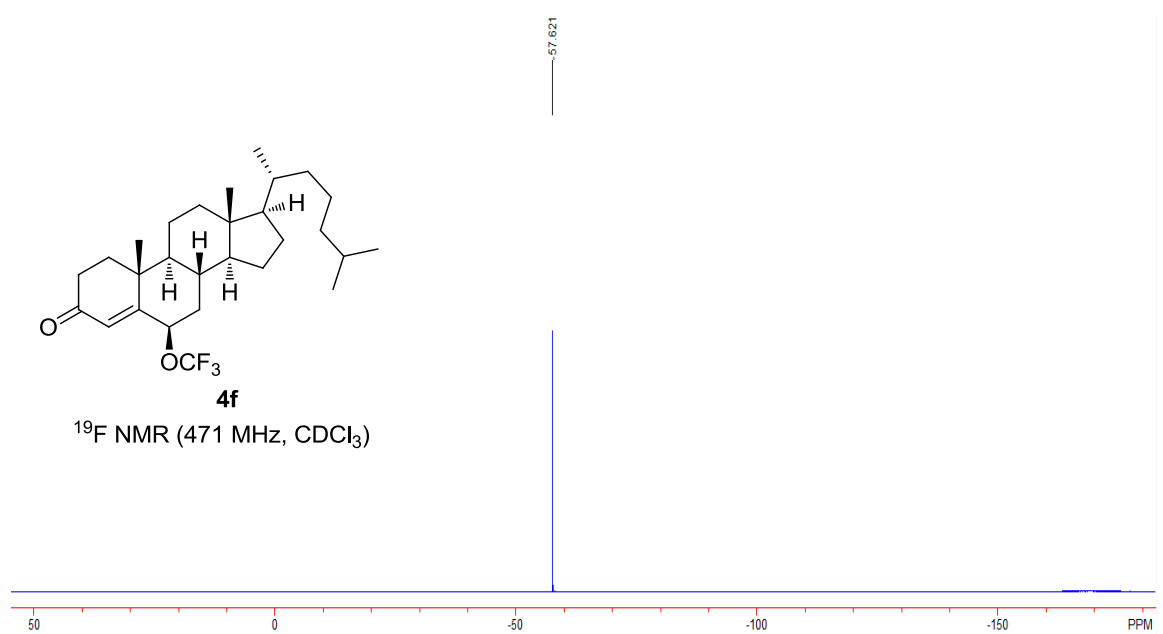

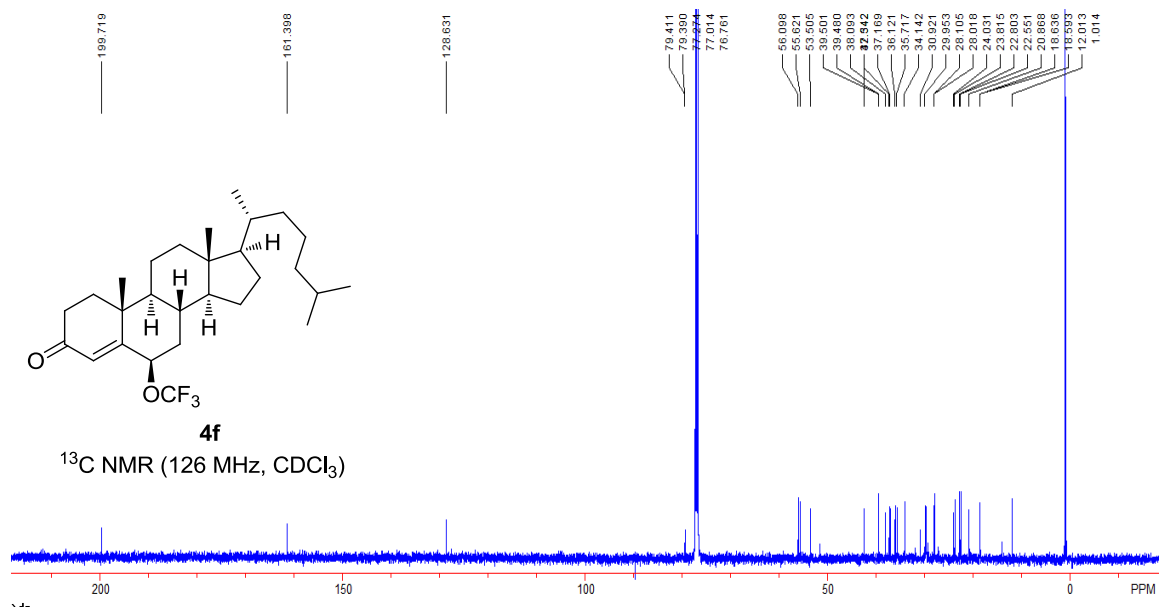

Supplement: c6cc03040h1.pdf [file c6cc03040h1.pdf]
